# Supplementary material for: Dissecting the dynamics of signaling events in the BMP, WNT, and NODAL cascade during self-organized fate patterning in human gastruloids
Source: PLoS Biol. 2019 Oct 15;17(10):e3000498. doi: 10.1371/journal.pbio.3000498 (PMC6814242; doi:10.1371/journal.pbio.3000498)
Supplement: S1 Table — (Sheet1) Fragments per kilobase per million (FPKM) values for all genes in all hESC samples. Sample_1, Sample_2, Sample_avg represent 2 biological replicates and average of the 2, respectively. (Sheet2) The list of 284 differentially expressed genes in BMP-treated samples versus pluripotent samples. (Sheet 3) The list of 174 lineage-specific genes in the human embryo dataset. (XLSX) [file pbio.3000498.s028.xlsx]

## Sheet: AllGenes_FPKM
genes	geneIds	media_1	media_2	bmp_1	bmp_2	bmpIwp2_1	bmpIwp2_2	bmpSb_1	bmpSb_2	media_avg	bmp_avg	bmpIwp2_avg	bmpSb_avg
	ENSG00000069712.10	0.24	0.51	0.24	0.21	0.24	0.18	0.32	0.24	0.375	0.225	0.21	0.28
	ENSG00000116957.12	23.37	23.92	12.21	12.75	12.91	13.76	12.49	15.45	23.645	12.48	13.335	13.97
	ENSG00000130201.7	0.79	0.58	0.07	0	0	0	0	0	0.685	0.035	0	0
	ENSG00000133808.4	0	0	0.07	0	0.04	0.08	0	0.12	0	0.035	0.06	0.06
	ENSG00000155640.6	3.11	2.52	2.06	2.01	2.6	1.67	3.04	1.75	2.815	2.035	2.135	2.395
	ENSG00000167945.1	0	0	0	0	0.23	0	0	0.09	0	0	0.115	0.045
	ENSG00000170647.3	5.5	3.6	2.32	2.79	2.35	2.32	4.57	2.72	4.55	2.555	2.335	3.645
	ENSG00000173088.12	0	0.2	0.15	0.54	0.16	0	0.14	0.35	0.1	0.345	0.08	0.245
	ENSG00000179979.8	2.14	1.51	2.06	1.76	2.29	1.33	2.02	1.35	1.825	1.91	1.81	1.685
	ENSG00000182109.7	2.02	1.77	1.74	2.91	1.51	2.22	2.2	2.64	1.895	2.325	1.865	2.42
	ENSG00000186232.3	0	0	0.35	0.42	0	0	0	0	0	0.385	0	0
	ENSG00000186354.10	0.35	0.06	0.91	0.08	0.36	0.17	1.65	0.22	0.205	0.495	0.265	0.935
	ENSG00000188206.6	10.37	6.72	4.52	4.8	4.72	3.35	5.48	3.91	8.545	4.66	4.035	4.695
	ENSG00000188477.12	0.06	0.07	0	0	0	0	0	0	0.065	0	0	0
	ENSG00000203819.6	4.44	4.02	3.81	6.92	0	5.92	1.56	2.52	4.23	5.365	2.96	2.04
	ENSG00000204365.5	0	0	0	0	0.07	0	0	0	0	0	0.035	0
	ENSG00000205663.5	3.44	1.31	2.46	1.34	3.56	0.23	1.32	2.36	2.375	1.9	1.895	1.84
	ENSG00000205664.10	32.92	36.82	31.61	41.34	24.27	29.64	27.72	40.63	34.87	36.475	26.955	34.175
	ENSG00000213971.7	18.82	19.12	14.4	17	12.16	11.92	22.36	19.78	18.97	15.7	12.04	21.07
	ENSG00000214733.8	0	0	0	0.91	0.24	0	0	1.39	0	0.455	0.12	0.695
	ENSG00000215447.7	5.72	5.68	14.17	5.81	5.79	8.51	10.02	7.94	5.7	9.99	7.15	8.98
	ENSG00000221972.3	0	0	0.44	1.09	1.04	1.04	0.35	0.3	0	0.765	1.04	0.325
	ENSG00000223401.1	0	0	1.25	0.5	3.64	1.3	0	1.33	0	0.875	2.47	0.665
	ENSG00000223473.2	1.35	1.19	2.09	3.7	1.63	1.62	1.53	1.86	1.27	2.895	1.625	1.695
	ENSG00000224871.1	1.25	0.94	2.8	2.58	1.93	1.12	1.7	1.8	1.095	2.69	1.525	1.75
	ENSG00000224911.1	0	2.52	1.44	1.72	0	2.48	2.01	0	1.26	1.58	1.24	1.005
	ENSG00000224956.5	4.93	4.23	3.95	4.35	5.74	4.33	4.26	3.08	4.58	4.15	5.035	3.67
	ENSG00000225261.1	0.22	0	0.36	0	0	0	0.27	0.35	0.11	0.18	0	0.31
	ENSG00000225302.2	0.64	0.68	0.46	0.68	0.3	0.36	1.11	0.75	0.66	0.57	0.33	0.93
	ENSG00000225490.1	0	0	0	0	0	0	0.34	0.62	0	0	0	0.48
	ENSG00000225541.1	0.25	0	0	0	0	0.33	0	0.08	0.125	0	0.165	0.04
	ENSG00000225892.3	2.13	2.23	2.2	2.4	2.06	2.17	2.71	2.89	2.18	2.3	2.115	2.8
	ENSG00000227136.2	0	0	1.39	0.49	0.4	0	0	0.16	0	0.94	0.2	0.08
	ENSG00000227603.1	0.83	0.68	0.76	0	0	0	0.92	0	0.755	0.38	0	0.46
	ENSG00000228214.6	0.57	1.66	2.03	2.44	5.38	2.25	10.18	3.48	1.115	2.235	3.815	6.83
	ENSG00000228265.5	1.19	1.1	3.04	3.69	0.99	2.34	1.48	3.58	1.145	3.365	1.665	2.53
	ENSG00000228989.1	4.02	4.27	1.64	1.93	1.75	4.92	1.25	1.27	4.145	1.785	3.335	1.26
	ENSG00000229481.2	4.04	2.05	0.83	0.22	0.63	0.43	0.97	0.25	3.045	0.525	0.53	0.61
	ENSG00000229729.6	2.58	1.25	3.49	4.18	4.6	7.57	3.9	3.65	1.915	3.835	6.085	3.775
	ENSG00000230058.1	0	0	0	0	0	1.35	0.53	0.52	0	0	0.675	0.525
	ENSG00000230439.2	0	0.1	0.15	0	0.08	0.08	0	0.06	0.05	0.075	0.08	0.03
	ENSG00000230939.1	0	0	0	0	0.43	0.53	0	0	0	0	0.48	0
	ENSG00000231025.1	2.5	2.66	1.99	2.69	1.63	1.78	3.21	1.82	2.58	2.34	1.705	2.515
	ENSG00000231121.3	1.02	0.19	0	0	0	0	0	0	0.605	0	0	0
	ENSG00000231196.3	0.6	0	0	0	0	0.59	0.5	0.23	0.3	0	0.295	0.365
	ENSG00000231435.1	0	0	0.14	0	0	0	0.13	0.11	0	0.07	0	0.12
	ENSG00000231459.1	0.1	0	0	0.1	0.09	0	0.07	0.06	0.05	0.05	0.045	0.065
	ENSG00000232224.5	0.04	0.04	0.17	0.12	0.1	0.03	0.09	0.19	0.04	0.145	0.065	0.14
	ENSG00000233501.1	0	0	0	0.13	0	0.12	0.05	0	0	0.065	0.06	0.025
	ENSG00000233800.3	0	0	0	0.72	0	0	0.36	0.48	0	0.36	0	0.42
	ENSG00000233895.1	0	0	0	1.93	0.84	1.64	5.9	0.85	0	0.965	1.24	3.375
	ENSG00000234165.1	0	0.46	0.35	0.85	0	0	0.92	0	0.23	0.6	0	0.46
	ENSG00000234449.2	0.16	0.42	0.11	0.15	0.13	0	0.11	0	0.29	0.13	0.065	0.055
	ENSG00000235373.1	2.19	1.03	1.26	1.05	1.15	0.4	1.5	1.07	1.61	1.155	0.775	1.285
	ENSG00000235565.1	0.25	0	0.05	0.06	0	0.06	0.15	0.08	0.125	0.055	0.03	0.115
	ENSG00000236850.4	1.82	1.99	1.83	1.51	1.2	2.04	2.44	1.85	1.905	1.67	1.62	2.145
	ENSG00000236983.1	0	0	0	0	0.27	0	0	0.47	0	0	0.135	0.235
	ENSG00000237021.2	0	0	0.23	0.21	0.25	0	0.11	0.14	0	0.22	0.125	0.125
	ENSG00000237485.5	4.15	0.51	2.12	1.18	2.13	0.62	1.77	2.83	2.33	1.65	1.375	2.3
	ENSG00000237647.8	0.17	0	0	0	0	0	0.07	0.12	0.085	0	0	0.095
	ENSG00000237857.2	0.33	0.73	0.73	1.35	0	0.2	0.17	0.67	0.53	1.04	0.1	0.42
	ENSG00000239500.2	0.41	0	0	0	0	0.88	0.5	0	0.205	0	0.44	0.25
	ENSG00000240524.2	11.26	3.54	4.27	4.54	18.13	5.93	10.99	3.67	7.4	4.405	12.03	7.33
	ENSG00000240618.1	0	0	3.51	0	0	4.53	0.12	2.43	0	1.755	2.265	1.275
	ENSG00000241043.1	0.16	0.44	0.13	0.24	0.94	0.71	0.38	0.65	0.3	0.185	0.825	0.515
	ENSG00000242349.5	1.23	0.98	2.05	3.89	2.19	2.27	0.27	3.06	1.105	2.97	2.23	1.665
	ENSG00000242687.2	1.83	1.46	2.27	0.78	1.72	0.53	1.16	1.72	1.645	1.525	1.125	1.44
	ENSG00000243113.1	0	0.87	2.71	0.23	0.1	0	0.4	1.12	0.435	1.47	0.05	0.76
	ENSG00000243350.1	0	0	3.3	3.75	0.53	0.8	1.69	6.86	0	3.525	0.665	4.275
	ENSG00000243587.6	0.12	0	0	0	0.1	0	0.19	0	0.06	0	0.05	0.095
	ENSG00000243993.1	0	0	0	0	0	2.87	4.6	6.68	0	0	1.435	5.64
	ENSG00000244211.3	0.19	0.19	0	0	0.31	0	0	0	0.19	0	0.155	0
	ENSG00000244567.1	1.76	1.68	0.73	2.06	1.67	0.68	0.89	0.94	1.72	1.395	1.175	0.915
	ENSG00000249430.1	27.22	16.34	61.51	41.38	55.83	30.01	56.12	37.92	21.78	51.445	42.92	47.02
	ENSG00000250588.6	5.17	4.97	2.62	4.65	4.32	4.69	2.52	3.19	5.07	3.635	4.505	2.855
	ENSG00000251331.6	0	2.22	5.64	4.44	2.97	0.58	2.05	2.23	1.11	5.04	1.775	2.14
	ENSG00000251628.1	0	0	8.41	3.54	1.32	2.68	4.13	1.18	0	5.975	2	2.655
	ENSG00000253379.5	0.16	0.18	0.07	0	0.29	0	0.13	0.11	0.17	0.035	0.145	0.12
	ENSG00000253426.5	0	0.25	0	0	0.55	0	0	0	0.125	0	0.275	0
	ENSG00000254010.1	3.46	4.87	8.99	3.8	13.47	11.97	8.75	5.04	4.165	6.395	12.72	6.895
	ENSG00000254286.5	0	1.3	0.99	0	0	1.53	0	0	0.65	0.495	0.765	0
	ENSG00000254414.1	0.21	0	0	0	0.19	0.39	0.34	0.9	0.105	0	0.29	0.62
	ENSG00000254667.2	4.93	1.91	3.58	4.41	3.69	1.16	1.32	5.52	3.42	3.995	2.425	3.42
	ENSG00000255318.1	1.07	0.5	0.57	0.23	0.19	0	1.04	0	0.785	0.4	0.095	0.52
	ENSG00000255864.5	0	0	1.53	0.32	1.27	0.28	0.47	0.15	0	0.925	0.775	0.31
	ENSG00000256164.1	0.78	1.53	0	0	0	0	0	0	1.155	0	0	0
	ENSG00000256304.1	3.73	2.9	11.98	8.8	9.22	9.16	9.23	6.43	3.315	10.39	9.19	7.83
	ENSG00000258297.1	3.35	4.87	4.5	3.74	3.84	6.9	3.25	2.86	4.11	4.12	5.37	3.055
	ENSG00000258838.5	0.44	1.52	1.25	2.32	1.41	1.77	1.48	1.78	0.98	1.785	1.59	1.63
	ENSG00000258929.6	0	0	0.54	0.12	0.61	0.05	0.24	0.57	0	0.33	0.33	0.405
	ENSG00000258999.1	0	0.44	0.33	0.4	0	0	0	0.27	0.22	0.365	0	0.135
	ENSG00000259264.5	0.55	1.88	0.39	0.24	0	0.72	0.37	0.32	1.215	0.315	0.36	0.345
	ENSG00000260114.2	1.53	0.96	1.49	0.7	1.7	1.56	2.42	1.14	1.245	1.095	1.63	1.78
	ENSG00000260614.1	0.6	0	0	0.34	0	0	0	0.23	0.3	0.17	0	0.115
	ENSG00000260766.1	1.05	0.88	0.2	0.65	0.43	0.07	0.69	0.27	0.965	0.425	0.25	0.48
	ENSG00000260837.1	0	0.11	0	0.1	0.26	0.17	0.15	0.07	0.055	0.05	0.215	0.11
	ENSG00000260841.1	0.55	0.29	0.36	0.31	0.32	0.24	0.07	0.24	0.42	0.335	0.28	0.155
	ENSG00000260936.1	0.13	0.15	0.22	0	0.12	0.59	0.21	0.54	0.14	0.11	0.355	0.375
	ENSG00000260977.1	0	0.19	0	0	0	0	0.14	0	0.095	0	0	0.07
	ENSG00000261254.2	0.08	0.31	0.23	0.05	0.12	0.14	0.06	0.07	0.195	0.14	0.13	0.065
	ENSG00000261317.1	2.96	4.56	3.85	5.69	2.63	2.8	4.9	3.95	3.76	4.77	2.715	4.425
	ENSG00000261353.1	4.26	4.52	0	4.01	4.57	1.66	1.14	2.64	4.39	2.005	3.115	1.89
	ENSG00000261533.2	0.13	0	0	0	0.18	0	0.1	0.18	0.065	0	0.09	0.14
	ENSG00000261643.1	0.82	1.19	1.79	3.06	1.81	0.57	1.15	1.89	1.005	2.425	1.19	1.52
	ENSG00000261685.2	0.32	0.26	0.29	0.68	0.36	0.21	0.62	0.72	0.29	0.485	0.285	0.67
	ENSG00000262222.1	6.44	3.81	4.6	3.58	4.59	3.68	4.94	5.05	5.125	4.09	4.135	4.995
	ENSG00000262251.1	1.61	3.97	0.99	2.28	0.52	2.53	0.81	1.52	2.79	1.635	1.525	1.165
	ENSG00000262601.1	1.41	2.23	1.05	1.28	1.04	0.45	1.15	0.68	1.82	1.165	0.745	0.915
	ENSG00000263013.1	0.97	1.09	1.64	1.15	0.25	0.25	0.99	0.38	1.03	1.395	0.25	0.685
	ENSG00000263082.1	0.45	0.35	0.16	0.13	0	0.11	0	0.43	0.4	0.145	0.055	0.215
	ENSG00000263214.1	0.39	0.15	0.11	0.89	0.23	0.3	0.41	0	0.27	0.5	0.265	0.205
	ENSG00000263470.1	5.59	7.97	5.74	10.3	4.69	6.36	11.23	11.72	6.78	8.02	5.525	11.475
	ENSG00000263931.1	1.41	0	4.93	0.59	10.74	6.11	4.53	3.14	0.705	2.76	8.425	3.835
	ENSG00000264299.1	0.98	4.1	26.01	23.14	17.38	21.34	10.42	11.46	2.54	24.575	19.36	10.94
	ENSG00000265780.1	0	0.21	0	0	0.17	0	0	0	0.105	0	0.085	0
	ENSG00000266486.1	0	0	0.87	0.57	0	0	0.4	0	0	0.72	0	0.2
	ENSG00000267163.1	1.02	0.88	0.77	0.95	1.15	0.89	1.9	0.81	0.95	0.86	1.02	1.355
	ENSG00000267194.1	4.18	3.19	0.32	0	0.2	0.25	0.49	0.19	3.685	0.16	0.225	0.34
	ENSG00000267701.2	0	0.95	0.36	0	0	0	0	0	0.475	0.18	0	0
	ENSG00000267896.1	5.18	4.72	1.19	0.96	2.46	0.83	3.76	3.82	4.95	1.075	1.645	3.79
	ENSG00000268439.5	29.39	32.06	7.24	8.6	13.3	12.99	13	11.51	30.725	7.92	13.145	12.255
	ENSG00000268525.1	19.83	17.11	8.5	10.25	10.34	8.86	13.89	8.43	18.47	9.375	9.6	11.16
	ENSG00000268549.1	0.52	0	0.18	0.37	0.13	0.2	0.06	0	0.26	0.275	0.165	0.03
	ENSG00000269051.5	2.01	0	0.8	0.97	3.9	0.84	3.45	1.61	1.005	0.885	2.37	2.53
	ENSG00000269227.1	2.59	0	0	0.58	0.81	1	0.89	0.77	1.295	0.29	0.905	0.83
	ENSG00000269549.2	0.18	0.19	0.5	0.35	0.28	0.4	0.76	0.29	0.185	0.425	0.34	0.525
	ENSG00000269948.5	0	0	0	0	0.17	0.08	0	0	0	0	0.125	0
	ENSG00000270010.1	0	1.9	0.48	2.89	0	0	0.81	1.15	0.95	1.685	0	0.98
	ENSG00000270028.1	0	0	0.92	1.12	0	0.65	0.27	0	0	1.02	0.325	0.135
	ENSG00000270067.1	0.29	0.36	0	1.31	0.26	0.57	0.72	3.93	0.325	0.655	0.415	2.325
	ENSG00000270189.1	0.98	0.8	1.4	0.82	1.24	0.5	0.95	0.49	0.89	1.11	0.87	0.72
	ENSG00000270223.1	0.19	0.66	0.17	0.81	1.86	0	0.77	0.54	0.425	0.49	0.93	0.655
	ENSG00000270246.3	65.57	48.9	11.14	13.93	11.85	16.34	13.29	14.8	57.235	12.535	14.095	14.045
	ENSG00000270750.1	0	0	0	0	0	0	0.81	1.55	0	0	0	1.18
	ENSG00000271020.1	0.84	1.67	0.84	1.52	1.47	0	0.72	1.69	1.255	1.18	0.735	1.205
	ENSG00000271430.1	5.61	2.57	7.63	5.82	5.32	6.25	10.18	5.97	4.09	6.725	5.785	8.075
	ENSG00000271840.1	0	0	0.22	0.27	0	0	0	0.18	0	0.245	0	0.09
	ENSG00000271941.1	0.78	0.31	1.18	1.44	0.92	1.01	1.5	2.69	0.545	1.31	0.965	2.095
	ENSG00000271997.1	0.43	0.11	0.11	0.14	0.26	0.06	0.03	0.05	0.27	0.125	0.16	0.04
	ENSG00000272250.1	0	0	0.46	0	0	0	0	0.36	0	0.23	0	0.18
	ENSG00000272367.1	0.19	0.64	0.16	0.39	0.16	0.34	1.04	0.26	0.415	0.275	0.25	0.65
	ENSG00000272486.1	0.16	0	0	0.17	0	0	0.13	0	0.08	0.085	0	0.065
	ENSG00000272579.1	9.99	11.16	8.4	8.38	6.14	6.48	11.22	9.91	10.575	8.39	6.31	10.565
	ENSG00000272780.5	1.22	1.82	0	0.44	0	0.53	0	0.18	1.52	0.22	0.265	0.09
	ENSG00000272869.5	7.91	1.05	0	0.58	10.55	1.53	5.77	0.91	4.48	0.29	6.04	3.34
	ENSG00000272993.1	1.16	1.42	1.61	0.65	1.03	2.55	2.88	2.82	1.29	1.13	1.79	2.85
	ENSG00000273009.1	0	0	0	0	0	0.34	0.28	0.52	0	0	0.17	0.4
	ENSG00000273030.1	0.49	0	0	1.24	0	0	0	0	0.245	0.62	0	0
	ENSG00000273170.5	0	0.12	0.03	0.19	0.74	0	0	0	0.06	0.11	0.37	0
	ENSG00000273237.1	1.1	0.24	0.72	0.33	0.68	0.2	0.43	0.82	0.67	0.525	0.44	0.625
	ENSG00000273352.1	0.25	0.88	1.11	1.62	0.65	1.88	0.6	1.44	0.565	1.365	1.265	1.02
	ENSG00000273389.1	0	0	3.42	1.62	0.52	0	3.25	1.07	0	2.52	0.26	2.16
	ENSG00000273478.1	1.79	0.37	5.57	0.68	1.32	1.18	2.98	0.68	1.08	3.125	1.25	1.83
	ENSG00000273547.1	0	0	0.08	0	0	0	0	0.06	0	0.04	0	0.03
	ENSG00000274245.1	0	0	0.25	0	0	0.54	0	0	0	0.125	0.27	0
	ENSG00000274627.1	3.74	1.25	1.72	1.49	2.15	1.16	3.21	1.16	2.495	1.605	1.655	2.185
	ENSG00000275149.1	0.2	0.04	0	0.08	0.11	0.14	0.09	0.18	0.12	0.04	0.125	0.135
	ENSG00000275673.1	0.64	0	0	0.37	0.28	0	0	0.49	0.32	0.185	0.14	0.245
	ENSG00000276073.1	0.21	0.26	0.53	0.45	0.41	0.61	0.19	0.24	0.235	0.49	0.51	0.215
	ENSG00000277877.4	1.79	0	0	0	0	0	0.51	0.5	0.895	0	0	0.505
	ENSG00000278309.1	0	0	0.09	0.22	0.14	0.1	0.3	0.31	0	0.155	0.12	0.305
	ENSG00000278451.1	4.18	1.5	17.68	14.28	22.46	26.28	24.23	14.44	2.84	15.98	24.37	19.335
	ENSG00000278566.1	0	0	0.08	0	0	0	0	0.06	0	0.04	0	0.03
	ENSG00000278882.1	1	0.32	0.36	0.45	0.13	0.39	0.34	0.49	0.66	0.405	0.26	0.415
	ENSG00000278919.1	0	0	0.11	0	0	0.06	0	0.04	0	0.055	0.03	0.02
	ENSG00000278938.1	0	0	0.39	0.91	0.97	0.38	1.11	0.3	0	0.65	0.675	0.705
	ENSG00000279007.1	0	0	0	0	0.73	0	0.83	0	0	0	0.365	0.415
	ENSG00000279010.1	0.12	0.08	0.09	0.1	0.12	0.08	0.15	0.1	0.1	0.095	0.1	0.125
	ENSG00000279018.1	2.81	0.23	1.75	0.21	0.53	0.94	0.49	1	1.52	0.98	0.735	0.745
	ENSG00000279448.1	0	3.04	1.18	0	0.73	0	1.67	0	1.52	0.59	0.365	0.835
	ENSG00000279473.1	89.07	100.73	63.89	74.47	71.55	62.62	71.3	80.02	94.9	69.18	67.085	75.66
	ENSG00000279496.1	3.08	3.3	4.01	3.91	2.36	2.92	4.21	4.15	3.19	3.96	2.64	4.18
	ENSG00000279522.1	0.47	0	0.08	0.48	0	0.17	0.15	0.38	0.235	0.28	0.085	0.265
	ENSG00000279535.1	0.96	2.84	0	0.08	0	1.58	0	0.04	1.9	0.04	0.79	0.02
	ENSG00000279560.1	0	0	0	27.93	14.76	0	0	0	0	13.965	7.38	0
	ENSG00000279576.1	9.54	64.37	43.37	205.21	57.1	159.29	40.12	143.28	36.955	124.29	108.195	91.7
	ENSG00000279618.1	63.05	58.45	41.01	49.26	31.7	43.54	43.63	41.51	60.75	45.135	37.62	42.57
	ENSG00000279624.3	1.36	0	1	0.58	0	0	0	0	0.68	0.79	0	0
	ENSG00000279644.1	2.52	1.22	2.44	2.35	1.83	2.89	2.18	3.39	1.87	2.395	2.36	2.785
	ENSG00000279767.1	33.14	27.76	22.83	20.68	21.05	23.85	24.49	25.51	30.45	21.755	22.45	25
	ENSG00000279816.1	0.34	0	0	1.6	0	0	0.58	0	0.17	0.8	0	0.29
	ENSG00000279877.1	0.21	0.5	0	0	0	0	0	0	0.355	0	0	0
	ENSG00000279909.1	15.81	15.06	6.43	4.92	7.54	6.27	5.35	4.47	15.435	5.675	6.905	4.91
	ENSG00000279921.1	0.4	0	0	1.28	0	1.08	0	0	0.2	0.64	0.54	0
	ENSG00000280041.1	0	0	0.39	0.91	0.97	0.38	1.11	0.3	0	0.65	0.675	0.705
	ENSG00000280141.1	0	0	0.39	0.91	0.97	0.38	1.11	0.3	0	0.65	0.675	0.705
	ENSG00000280156.1	0.04	0	0	0	0	0	0	0	0.02	0	0	0
	ENSG00000280158.1	10.22	15.32	26.75	23.03	15.48	31.24	17.26	21.7	12.77	24.89	23.36	19.48
	ENSG00000280178.1	2.98	3.56	1.12	2.45	0.44	0.95	0.61	1.45	3.27	1.785	0.695	1.03
	ENSG00000280240.1	0	0.09	0	0	0	0.07	0.06	0.11	0.045	0	0.035	0.085
	ENSG00000280316.1	1.32	0.83	0.28	0	0.31	0.12	0.05	0.14	1.075	0.14	0.215	0.095
	ENSG00000280328.1	0.16	0.13	0.26	0.07	0.06	0.07	0.12	0.1	0.145	0.165	0.065	0.11
	ENSG00000280403.1	5.04	0	0	1.36	0	0	0	2.7	2.52	0.68	0	1.35
	ENSG00000281205.1	0.38	0.29	0.16	0.06	0.16	0.07	0.14	0.12	0.335	0.11	0.115	0.13
	ENSG00000281508.1	1.24	4.66	0.94	4.93	1.47	2.48	1.38	3.78	2.95	2.935	1.975	2.58
	ENSG00000281796.1	0.09	0.37	0.07	0.09	0.23	0	0.33	0.34	0.23	0.08	0.115	0.335
	ENSG00000281844.1	0.47	0.48	1.11	0.5	0.41	0.65	0.46	1.21	0.475	0.805	0.53	0.835
	ENSG00000281881.1	5.68	3.28	3.71	6.63	6.95	4.2	5.12	3.21	4.48	5.17	5.575	4.165
	ENSG00000281932.1	1.4	0.39	0.26	0.14	0	0.12	0.94	0.97	0.895	0.2	0.06	0.955
	ENSG00000282031.1	7.22	0	4.12	0	6.91	1.44	0	0	3.61	2.06	4.175	0
	ENSG00000282056.1	2.02	1.33	1.99	1.43	1.8	1.17	1.74	1.91	1.675	1.71	1.485	1.825
	ENSG00000282558.1	2.35	1.71	0.63	0	0.49	3.79	2.24	2.11	2.03	0.315	2.14	2.175
	ENSG00000282682.1	6.92	0	2.29	2.46	8.37	5.92	2.58	11.02	3.46	2.375	7.145	6.8
A1BG	ENSG00000121410.11	8.21	19.67	2.8	16.57	1.8	8.62	2.26	7.46	13.94	9.685	5.21	4.86
A1BG-AS1	ENSG00000268895.5	4.13	2.99	2.98	4.8	3.28	3.3	2.37	3.97	3.56	3.89	3.29	3.17
A1CF	ENSG00000148584.14	0	0	0	0.03	0	0	0.02	0.02	0	0.015	0	0.02
A2M	ENSG00000175899.14	0	0	0	0.28	0.73	0.35	0	0	0	0.14	0.54	0
A2M-AS1	ENSG00000245105.2	0	0.29	0	0.07	0.06	0	0.1	0.09	0.145	0.035	0.03	0.095
A2ML1	ENSG00000166535.19	2.15	0.57	7.27	5.93	3.26	5.21	6.99	4.75	1.36	6.6	4.235	5.87
A4GALT	ENSG00000128274.15	2.18	3.69	0.12	0.08	0.06	0.07	0	0.36	2.935	0.1	0.065	0.18
AAAS	ENSG00000094914.12	37.34	45.71	45.99	48.39	43.19	43.86	34.97	47.59	41.525	47.19	43.525	41.28
AACS	ENSG00000081760.16	28.91	28.26	13.33	12.17	13.6	12.03	15.97	14.82	28.585	12.75	12.815	15.395
AACSP1	ENSG00000250420.8	0.15	0.54	0	0	0	0.17	0	0.1	0.345	0	0.085	0.05
AADAC	ENSG00000114771.13	0	0.1	0.08	0	0	0	0	0	0.05	0.04	0	0
AADACL3	ENSG00000188984.11	0.29	0.2	0.06	0.28	0.03	0.19	0.22	0.27	0.245	0.17	0.11	0.245
AADAT	ENSG00000109576.13	5.26	4.56	8.02	6.3	5.56	7.93	5.87	7.57	4.91	7.16	6.745	6.72
AAGAB	ENSG00000103591.12	20.72	22.32	25.41	26.05	24.67	25.86	27.52	23.77	21.52	25.73	25.265	25.645
AAK1	ENSG00000115977.18	21.28	6.67	24.62	25.6	20.71	15.53	28.09	18.96	13.975	25.11	18.12	23.525
AAMDC	ENSG00000087884.14	9.65	31.55	19.78	33.24	13.26	27.46	16.86	22.39	20.6	26.51	20.36	19.625
AAMP	ENSG00000127837.9	119.65	136.21	99.15	94.14	101.17	99.74	80.75	97.95	127.93	96.645	100.455	89.35
AANAT	ENSG00000129673.9	0	0.38	0.2	0	0.44	0	0	0.16	0.19	0.1	0.22	0.08
AAR2	ENSG00000131043.11	19.85	21.33	18.96	17.74	17.54	19.83	16.24	21.38	20.59	18.35	18.685	18.81
AARD	ENSG00000205002.3	1.63	1.96	0.25	0.06	0	0.05	0.1	0	1.795	0.155	0.025	0.05
AARS	ENSG00000090861.15	130.28	110.98	80.21	73.23	68.56	56.86	92.91	80.94	120.63	76.72	62.71	86.925
AARS2	ENSG00000124608.4	10.86	8.36	10.77	9.34	10.49	10.27	10.3	12.34	9.61	10.055	10.38	11.32
AARSD1	ENSG00000266967.6	33.11	43.19	20.27	24.28	24.1	18.57	21.46	30.12	38.15	22.275	21.335	25.79
AASDH	ENSG00000157426.13	4.8	5.25	4.78	5.39	3.18	4.77	6.98	4.49	5.025	5.085	3.975	5.735
AASDHPPT	ENSG00000149313.10	17.69	15.52	11.01	12.5	12.36	14.11	12.21	12.96	16.605	11.755	13.235	12.585
AASS	ENSG00000008311.14	202.61	142.56	22.5	17.27	18.58	17.37	32.99	18.94	172.585	19.885	17.975	25.965
AATBC	ENSG00000215458.8	0.75	0.22	0.12	0.12	0.08	0.05	0.05	0.18	0.485	0.12	0.065	0.115
AATF	ENSG00000275700.4	42.91	39.28	25.45	21.16	24.28	26.12	23.82	24.93	41.095	23.305	25.2	24.375
AATK	ENSG00000181409.11	1.21	1.04	0.34	0.55	0.36	0.3	0.43	0.44	1.125	0.445	0.33	0.435
ABALON	ENSG00000281376.1	13.43	14	8	14.16	9.82	11.81	8.99	10.27	13.715	11.08	10.815	9.63
ABAT	ENSG00000183044.11	4.77	3.34	1.82	2.29	0.91	1.16	1.84	1.98	4.055	2.055	1.035	1.91
ABCA1	ENSG00000165029.15	6.16	2.4	3.26	2.43	4.14	2.17	3.59	4.13	4.28	2.845	3.155	3.86
ABCA10	ENSG00000154263.17	0	0	0	0	0	0	0.19	0.02	0	0	0	0.105
ABCA11P	ENSG00000251595.7	3.45	2.99	2.45	2.37	0.83	1.93	2.87	2.79	3.22	2.41	1.38	2.83
ABCA12	ENSG00000144452.14	0.02	0.02	0.03	0.04	0.05	0.05	0.03	0.05	0.02	0.035	0.05	0.04
ABCA13	ENSG00000179869.14	0.02	0.03	0	0	0.11	0	0	0.01	0.025	0	0.055	0.005
ABCA17P	ENSG00000238098.8	0	0.07	0	0	0.06	0.62	0.05	0.04	0.035	0	0.34	0.045
ABCA2	ENSG00000107331.16	6.55	5.19	1.21	0.49	1.32	0.81	2.54	1.08	5.87	0.85	1.065	1.81
ABCA3	ENSG00000167972.13	7.92	3.07	1.37	0.94	1.73	0.66	2.45	1.12	5.495	1.155	1.195	1.785
ABCA4	ENSG00000198691.11	0	0	2.68	4.39	1.62	4.09	3.57	2.13	0	3.535	2.855	2.85
ABCA5	ENSG00000154265.15	3.32	1.26	1.66	0.83	0.55	1.63	3.13	0.64	2.29	1.245	1.09	1.885
ABCA7	ENSG00000064687.12	11.92	4.35	26.98	16.82	31.09	12.92	32.57	16.91	8.135	21.9	22.005	24.74
ABCA8	ENSG00000141338.13	0.03	0.5	0.08	0	0	0.04	0	0	0.265	0.04	0.02	0
ABCB1	ENSG00000085563.14	0.65	1.5	0.35	0.25	0.71	0.29	0	0.05	1.075	0.3	0.5	0.025
ABCB10	ENSG00000135776.4	5.17	4.92	4.04	5.42	4.42	4.65	4.36	5.42	5.045	4.73	4.535	4.89
ABCB10P1	ENSG00000274099.1	0.22	0.29	0.05	0.2	0.06	0	0.21	0.09	0.255	0.125	0.03	0.15
ABCB10P3	ENSG00000261524.1	0	0	0.11	0	0.06	0.18	0.16	0	0	0.055	0.12	0.08
ABCB10P4	ENSG00000260053.2	0.12	0.29	0	0.07	0	0	0	0.04	0.205	0.035	0	0.02
ABCB4	ENSG00000005471.15	0.49	0.12	0.82	0	0.85	0.03	0.14	0.41	0.305	0.41	0.44	0.275
ABCB6	ENSG00000115657.12	13.97	15.59	7.59	5.29	5.81	4.66	6.04	6.99	14.78	6.44	5.235	6.515
ABCB7	ENSG00000131269.15	28.67	17.42	22.45	17.46	15.46	25.19	24.44	16.67	23.045	19.955	20.325	20.555
ABCB8	ENSG00000197150.12	14.08	12.67	18.61	18.96	16.62	11.33	19.63	17.3	13.375	18.785	13.975	18.465
ABCB9	ENSG00000150967.17	4.11	4.44	2.55	2.22	2.73	2.71	3.91	3.06	4.275	2.385	2.72	3.485
ABCC1	ENSG00000103222.18	31.78	17	15.34	10.24	14.23	8.65	16.92	15.07	24.39	12.79	11.44	15.995
ABCC10	ENSG00000124574.14	12.71	8.27	14.16	14.98	10.21	14.48	16.64	10.23	10.49	14.57	12.345	13.435
ABCC11	ENSG00000121270.15	0.85	0	0.31	0.62	0.5	0.2	0.69	0.22	0.425	0.465	0.35	0.455
ABCC13	ENSG00000243064.8	0.04	0	0.25	0.62	0.12	0.13	0.04	0.05	0.02	0.435	0.125	0.045
ABCC2	ENSG00000023839.10	0.18	0.14	0.08	0.03	0.05	0.02	0.1	0.03	0.16	0.055	0.035	0.065
ABCC3	ENSG00000108846.15	0	0.24	0.46	0.02	0.07	0.25	0	0.08	0.12	0.24	0.16	0.04
ABCC4	ENSG00000125257.13	5.39	3.83	22.51	20.13	12.48	7.84	25.43	20.84	4.61	21.32	10.16	23.135
ABCC5	ENSG00000114770.16	17.49	18.16	13.4	14.9	11.78	11.26	16.99	13.61	17.825	14.15	11.52	15.3
ABCC6	ENSG00000091262.14	0.26	0.74	0.99	3.76	0.39	1.65	2.41	3.19	0.5	2.375	1.02	2.8
ABCC6P1	ENSG00000256340.8	0.45	0	0.11	1.77	1.09	0.83	1.67	1.45	0.225	0.94	0.96	1.56
ABCC6P2	ENSG00000255277.3	0	0	0.25	1.09	0.48	1.04	0.44	0.58	0	0.67	0.76	0.51
ABCC8	ENSG00000006071.11	0.57	1.73	0.03	0.61	0	0	0.05	0.09	1.15	0.32	0	0.07
ABCD1	ENSG00000101986.11	4.18	3.44	11.43	9.2	9.79	9.16	6.91	5.68	3.81	10.315	9.475	6.295
ABCD3	ENSG00000117528.11	15.16	8.58	34.74	33.08	29.75	33.98	40.73	31.31	11.87	33.91	31.865	36.02
ABCD4	ENSG00000119688.20	39.47	39.88	33.07	37.69	27.06	29.84	26.18	41.74	39.675	35.38	28.45	33.96
ABCE1	ENSG00000164163.10	98.95	74.07	28.21	28.39	30.93	27.29	25.39	33.21	86.51	28.3	29.11	29.3
ABCF1	ENSG00000204574.12	76.64	81.6	48.88	53.49	55.79	49.01	44.12	51.76	79.12	51.185	52.4	47.94
ABCF2	ENSG00000033050.7	62.1	42.43	28.8	30.59	33.31	27.96	31.19	29.62	52.265	29.695	30.635	30.405
ABCF3	ENSG00000161204.11	28.85	26.41	32.57	32.87	38.39	31.43	35.15	34.29	27.63	32.72	34.91	34.72
ABCG1	ENSG00000160179.18	2.53	2.22	0.56	0.43	2.01	1.09	1.59	0.89	2.375	0.495	1.55	1.24
ABCG2	ENSG00000118777.10	1.39	1.33	135.72	97.41	52.55	69.57	171.17	95.39	1.36	116.565	61.06	133.28
ABCG4	ENSG00000172350.9	1.01	0.53	0.09	0.06	0	0	0	0.14	0.77	0.075	0	0.07
ABCG5	ENSG00000138075.11	0	0.05	0.04	0	0	0	0	0	0.025	0.02	0	0
ABHD1	ENSG00000143994.13	0.19	0.05	0	0	0	0	0	0	0.12	0	0	0
ABHD10	ENSG00000144827.8	17.18	11.73	8.45	8.33	8.29	9.49	8.51	11.26	14.455	8.39	8.89	9.885
ABHD11	ENSG00000106077.18	5.84	9.35	13.58	16.03	12.48	12.71	16.87	15.72	7.595	14.805	12.595	16.295
ABHD11-AS1	ENSG00000225969.1	0	0.5	0	0	0	0	0.33	0	0.25	0	0	0.165
ABHD12	ENSG00000100997.18	32.82	32.61	57.36	54.39	45.32	46.35	60.61	53.49	32.715	55.875	45.835	57.05
ABHD13	ENSG00000139826.5	2.55	3.75	4.73	4.96	3.69	5.1	4.63	4.19	3.15	4.845	4.395	4.41
ABHD14A	ENSG00000248487.8	4.16	2.19	1.32	2.11	0.67	1.36	0.82	1.67	3.175	1.715	1.015	1.245
ABHD14A-ACY1	ENSG00000114786.15	0.19	0	0	0	0.83	0.17	0.15	1.86	0.095	0	0.5	1.005
ABHD14B	ENSG00000114779.19	3.15	2.44	1.82	2.43	1.63	2.68	2.35	2.14	2.795	2.125	2.155	2.245
ABHD15	ENSG00000168792.4	0.31	0.95	0.31	0.76	0.41	0.57	0.8	1.02	0.63	0.535	0.49	0.91
ABHD16A	ENSG00000204427.11	14.05	19.23	23.52	23.81	19.26	20.36	20.51	30.12	16.64	23.665	19.81	25.315
ABHD16B	ENSG00000183260.6	2.09	2.26	3.04	2.57	3.66	2.32	2.33	3.48	2.175	2.805	2.99	2.905
ABHD17A	ENSG00000129968.15	38.78	39.19	67.53	58.4	67.98	56.79	61.62	72.79	38.985	62.965	62.385	67.205
ABHD17AP1	ENSG00000198658.4	0	0.63	0	0	0	0	0.15	0.13	0.315	0	0	0.14
ABHD17B	ENSG00000107362.13	34.25	28.23	20.61	22.64	16.75	20.26	17.33	19.69	31.24	21.625	18.505	18.51
ABHD17C	ENSG00000136379.11	14.03	16.89	6.82	11.06	9.49	9.76	8.32	13.13	15.46	8.94	9.625	10.725
ABHD18	ENSG00000164074.14	9.34	7.04	7.8	4.86	8.59	7.66	7.25	7.07	8.19	6.33	8.125	7.16
ABHD2	ENSG00000140526.16	10.68	6.19	20.81	19.32	17.73	17.45	20.48	8.54	8.435	20.065	17.59	14.51
ABHD3	ENSG00000158201.9	2.47	2.81	1.39	5.14	1.57	5.73	2.21	3.8	2.64	3.265	3.65	3.005
ABHD4	ENSG00000100439.10	16.93	17.06	20.08	19.91	19.36	21.75	19.81	22.02	16.995	19.995	20.555	20.915
ABHD5	ENSG00000011198.7	9.24	11.92	12.6	10.18	14.4	15.14	11.29	11.57	10.58	11.39	14.77	11.43
ABHD6	ENSG00000163686.13	2.83	2.08	1.16	1.85	1.3	1.78	1.21	2.31	2.455	1.505	1.54	1.76
ABHD8	ENSG00000127220.5	8.24	9.37	17.73	15.81	15.75	15.42	18.21	19.9	8.805	16.77	15.585	19.055
ABI1	ENSG00000136754.16	10.19	10.55	19.9	22.4	18.75	23.36	18.67	21.57	10.37	21.15	21.055	20.12
ABI2	ENSG00000138443.15	47.36	38.48	22.61	23.26	36.36	27.85	34.79	25.84	42.92	22.935	32.105	30.315
ABI3	ENSG00000108798.8	2.02	1.46	0.11	0	0.08	0	0	0.06	1.74	0.055	0.04	0.03
ABI3BP	ENSG00000154175.16	0.12	0.41	0	0	0	0.07	0	0	0.265	0	0.035	0
ABL1	ENSG00000097007.17	50.11	40.73	51.06	45.56	44.94	44.54	55.83	46.85	45.42	48.31	44.74	51.34
ABL2	ENSG00000143322.19	12	4.34	4.17	4.4	5.28	3.82	7.98	4.24	8.17	4.285	4.55	6.11
ABLIM1	ENSG00000099204.18	38.69	16.9	14.65	13.3	10.04	10.76	15.88	13.58	27.795	13.975	10.4	14.73
ABLIM2	ENSG00000163995.18	0.82	0.4	0.11	0.41	0.06	0.08	0.52	0.22	0.61	0.26	0.07	0.37
ABLIM3	ENSG00000173210.19	0.36	0.24	0.65	0.25	0.43	0.58	0.36	0.29	0.3	0.45	0.505	0.325
ABO	ENSG00000175164.13	0.02	0.02	0	0	0	0	0.03	0	0.02	0	0	0.015
ABR	ENSG00000159842.14	22.87	13.94	13.22	11.08	16.96	14.77	20.88	26.37	18.405	12.15	15.865	23.625
ABRACL	ENSG00000146386.7	74.04	192.75	123.08	186.92	112.35	172.1	91.25	203.48	133.395	155	142.225	147.365
ABRAXAS1	ENSG00000163322.13	11.03	8.91	6.89	5.12	2.78	4.85	5.48	3.38	9.97	6.005	3.815	4.43
ABRAXAS2	ENSG00000165660.7	6.13	6.9	5.68	7.02	5.29	6.74	5.37	6.91	6.515	6.35	6.015	6.14
ABT1	ENSG00000146109.4	10	16.99	14.56	18.8	14.43	19.3	10.99	18.3	13.495	16.68	16.865	14.645
ABTB1	ENSG00000114626.17	0.98	1.42	1.67	2.73	5.94	4.27	3.06	4.32	1.2	2.2	5.105	3.69
ABTB2	ENSG00000166016.5	6.5	6.46	6.56	4.31	3.51	5.27	2.57	1.98	6.48	5.435	4.39	2.275
AC000032.1	ENSG00000260246.1	0.48	2.01	0	0	1.27	0	0	0.81	1.245	0	0.635	0.405
AC000068.1	ENSG00000185065.6	1.25	0.75	1.01	1.18	0.31	1.1	1.3	0.93	1	1.095	0.705	1.115
AC000068.2	ENSG00000273212.1	1.09	0	0	0	0	0	0.49	0.48	0.545	0	0	0.485
AC000068.3	ENSG00000273300.1	7.57	2.93	8.98	4.42	6.61	5.27	6.41	8.77	5.25	6.7	5.94	7.59
AC000078.1	ENSG00000232926.1	0	0	0	0	0.25	0	1.17	0.21	0	0	0.125	0.69
AC000089.1	ENSG00000235776.2	0	0.29	0	0	0	0.43	0.18	0	0.145	0	0.215	0.09
AC000095.1	ENSG00000270393.1	0.4	0.46	0.7	0	1.42	0	0.97	0	0.43	0.35	0.71	0.485
AC000120.1	ENSG00000243107.1	0.42	0.12	0.56	0.43	0.66	0.2	1.31	0.58	0.27	0.495	0.43	0.945
AC000123.2	ENSG00000279265.1	0	0	0.6	0	1.43	0	0	1.42	0	0.3	0.715	0.71
AC000123.3	ENSG00000280347.1	0.36	0.03	0.24	0.27	0.29	0.24	0.61	0.38	0.195	0.255	0.265	0.495
AC000367.1	ENSG00000224981.1	0	0	0	0	0	0	0.07	0.06	0	0	0	0.065
AC000403.1	ENSG00000278727.1	0.08	0	0	0	0	0.03	0.03	0	0.04	0	0.015	0.015
AC002044.2	ENSG00000279591.1	0	0	0	0.18	0.31	0	0	0.37	0	0.09	0.155	0.185
AC002056.1	ENSG00000213683.4	0.24	0	0	0	0	0	0	0.08	0.12	0	0	0.04
AC002059.1	ENSG00000273216.1	0	0	0.55	0	0	0	0	0.43	0	0.275	0	0.215
AC002091.1	ENSG00000265975.1	0	0.51	1.15	0	0.34	0	0	0	0.255	0.575	0.17	0
AC002091.2	ENSG00000266389.1	0	2.37	0.91	2.13	0	0	1.36	2.11	1.185	1.52	0	1.735
AC002094.1	ENSG00000258924.4	6.03	3.05	0	0.95	0	0	0	0.17	4.54	0.475	0	0.085
AC002094.2	ENSG00000265618.1	2.03	5.89	3.92	6.63	6.32	6.59	3.33	5.92	3.96	5.275	6.455	4.625
AC002116.1	ENSG00000248101.2	0.78	0	0	0	0	0	0	1.99	0.39	0	0	0.995
AC002116.2	ENSG00000267698.1	0	1.54	1.16	1.41	0.55	0	0.51	1.87	0.77	1.285	0.275	1.19
AC002128.1	ENSG00000268947.1	0.82	0.19	1.26	0.17	1.31	0.15	0.39	0.11	0.505	0.715	0.73	0.25
AC002310.1	ENSG00000235560.3	1.17	0.94	0.62	2.71	0.66	2	0.59	2.03	1.055	1.665	1.33	1.31
AC002310.2	ENSG00000239791.1	1.7	3.15	3.14	3.55	2.7	2.89	3.3	2.65	2.425	3.345	2.795	2.975
AC002310.3	ENSG00000260494.1	0.26	0.63	0	0	0.23	0	0.21	0	0.445	0	0.115	0.105
AC002310.6	ENSG00000278922.1	3.61	2.25	4.77	4.15	3.32	4.55	4.17	3.69	2.93	4.46	3.935	3.93
AC002350.1	ENSG00000278993.1	0.57	0.53	0.66	0.41	0.51	0.57	1.52	0.6	0.55	0.535	0.54	1.06
AC002351.1	ENSG00000258240.5	0.71	0	0	0	0	0	0	0.55	0.355	0	0	0.275
AC002398.1	ENSG00000267049.1	0.63	0	0	0	1.1	0	1.75	0.58	0.315	0	0.55	1.165
AC002467.1	ENSG00000241764.3	2.38	8.7	1.42	5.01	1.06	3.64	1.26	3.5	5.54	3.215	2.35	2.38
AC002470.1	ENSG00000272829.1	0	0	0	3.39	3.24	0	0.72	2.24	0	1.695	1.62	1.48
AC002480.1	ENSG00000232759.1	0	0.06	0.05	0.06	0	0.05	0	0.16	0.03	0.055	0.025	0.08
AC002519.1	ENSG00000259810.2	0	0	0.2	0	0	0.04	0.08	0	0	0.1	0.02	0.04
AC002525.1	ENSG00000279314.1	0	0.1	0.46	0.09	0.5	0.5	0	0.31	0.05	0.275	0.5	0.155
AC002540.1	ENSG00000279067.1	0	0	0.1	0.24	0	0	0	0	0	0.17	0	0
AC002543.1	ENSG00000235945.1	0.08	0	0	0.3	0	0	0	0.05	0.04	0.15	0	0.025
AC002550.1	ENSG00000261312.1	11.89	16.78	3.59	5.95	5.91	6.98	5.11	7.34	14.335	4.77	6.445	6.225
AC002550.2	ENSG00000276571.1	0.75	6.34	0	0	1.3	1.93	0	0	3.545	0	1.615	0
AC002553.1	ENSG00000227782.2	0.9	0	1.59	1.71	1.99	1.06	3.1	0.65	0.45	1.65	1.525	1.875
AC002553.2	ENSG00000275413.1	0	0	2.07	0	0	1.93	3.87	0	0	1.035	0.965	1.935
AC002558.1	ENSG00000239291.1	0.22	0	0.6	0	0	0.21	0	0.16	0.11	0.3	0.105	0.08
AC002996.1	ENSG00000257767.2	4.94	0	0	0	5.67	0	0	2.5	2.47	0	2.835	1.25
AC003002.3	ENSG00000269533.5	0.58	0	0.31	1.37	0	1.2	0	1.72	0.29	0.84	0.6	0.86
AC003070.1	ENSG00000267344.1	0.55	0	0	0	0.97	0.63	0.99	0	0.275	0	0.8	0.495
AC003072.1	ENSG00000250318.1	0	1.26	0.95	0	0.29	1.67	1.4	1.54	0.63	0.475	0.98	1.47
AC003101.3	ENSG00000278977.1	18.61	7.38	12.81	12.52	13.74	14.32	16.53	12.32	12.995	12.665	14.03	14.425
AC003102.1	ENSG00000260793.2	0.25	0.81	1.88	1.33	1.89	1.41	1.48	1.89	0.53	1.605	1.65	1.685
AC003681.1	ENSG00000279159.1	0.66	0.38	0.73	0.76	0.87	0.7	0.95	0.82	0.52	0.745	0.785	0.885
AC003957.1	ENSG00000279825.1	0.05	0.06	0	0.03	0.02	0.05	0.16	0.04	0.055	0.015	0.035	0.1
AC003973.3	ENSG00000279377.1	23.25	0.43	9.23	0.2	8.24	0.13	11.77	0.26	11.84	4.715	4.185	6.015
AC003991.1	ENSG00000228113.7	0	0	0	0.51	0.43	0	0	0.84	0	0.255	0.215	0.42
AC004057.1	ENSG00000196656.7	36.35	715.26	330.73	369.1	57.39	389.09	78.19	474.8	375.805	349.915	223.24	276.495
AC004067.1	ENSG00000273447.1	0	1.98	0	0.3	0.48	0	1.79	0.2	0.99	0.15	0.24	0.995
AC004069.1	ENSG00000251259.1	0.4	0	0	1.43	0	0	0	0	0.2	0.715	0	0
AC004076.1	ENSG00000268163.1	0	0	0	0	1.65	0	0	0.51	0	0	0.825	0.255
AC004076.2	ENSG00000276449.1	0.67	0.58	0.03	0.17	0.3	0.04	0.16	0.11	0.625	0.1	0.17	0.135
AC004080.1	ENSG00000253308.2	0	0	0.44	1.33	0	0	0.2	2.49	0	0.885	0	1.345
AC004148.2	ENSG00000263272.1	4.64	4.95	2.84	2.74	3.79	2.87	4.55	3.15	4.795	2.79	3.33	3.85
AC004156.1	ENSG00000267666.2	0	0	0	0.17	0.04	0	0.1	0.03	0	0.085	0.02	0.065
AC004158.1	ENSG00000260664.2	0.19	0.1	0.15	0.28	0.11	0.08	0.12	0.19	0.145	0.215	0.095	0.155
AC004160.1	ENSG00000230333.6	0	0	0.51	0.48	0	0.06	0	0.18	0	0.495	0.03	0.09
AC004217.1	ENSG00000257494.1	0	0	0.89	0	0.22	0	0	0.18	0	0.445	0.11	0.09
AC004221.1	ENSG00000267778.1	0.42	0.49	0	0	0.93	0.2	0.17	0.6	0.455	0	0.565	0.385
AC004232.2	ENSG00000262899.1	0	0	0.38	0	0.39	0	0.53	0.31	0	0.19	0.195	0.42
AC004232.3	ENSG00000279031.1	0.43	0.58	0.44	0	0	0	0	0	0.505	0.22	0	0
AC004233.1	ENSG00000262362.1	0.34	0	0	0	0	0.68	0.28	0.78	0.17	0	0.34	0.53
AC004233.2	ENSG00000270168.2	0.07	0.38	0.11	0.35	0.13	0.12	0.06	0.14	0.225	0.23	0.125	0.1
AC004233.3	ENSG00000272079.2	2.62	2.36	3.85	3.58	3.43	4.71	4.52	5.8	2.49	3.715	4.07	5.16
AC004241.1	ENSG00000257433.5	0.17	1.08	0.95	0	0	0.04	0.36	0.34	0.625	0.475	0.02	0.35
AC004241.3	ENSG00000276390.1	0.44	1.19	0	0	0	0	2.67	0.72	0.815	0	0	1.695
AC004241.4	ENSG00000277173.1	0.15	0	0	0	0.13	0	0	0	0.075	0	0.065	0
AC004241.5	ENSG00000280054.1	0	0.06	0	0.12	0	0	0.09	0.08	0.03	0.06	0	0.085
AC004263.1	ENSG00000275936.1	1.14	0	0.53	0.32	0	0.84	0.94	0.43	0.57	0.425	0.42	0.685
AC004264.1	ENSG00000268812.3	0.91	0	0.2	0.25	0	0	0	0	0.455	0.225	0	0
AC004408.2	ENSG00000280177.1	0	0.05	0	0	0.05	0	0.04	0.13	0.025	0	0.025	0.085
AC004448.2	ENSG00000235979.8	0	0	0.15	0	0	0	0	0	0	0.075	0	0
AC004449.1	ENSG00000261204.1	1.23	0.94	0.72	1.7	0.54	1.45	0	1.12	1.085	1.21	0.995	0.56
AC004453.1	ENSG00000146677.7	0.69	2.25	0	1.02	0	0.86	0	0.67	1.47	0.51	0.43	0.335
AC004453.2	ENSG00000279853.1	0	0	0	0	0.06	0.12	0.16	0.18	0	0	0.09	0.17
AC004461.2	ENSG00000281530.1	0.9	0.26	0.2	0	0.99	0.21	1.64	0.97	0.58	0.1	0.6	1.305
AC004466.1	ENSG00000268069.2	1.52	2.24	2.58	1.9	2.3	0.42	1.81	0.21	1.88	2.24	1.36	1.01
AC004471.2	ENSG00000272682.1	0.2	0.33	0.17	0.2	0.27	0	0.24	0.07	0.265	0.185	0.135	0.155
AC004477.1	ENSG00000263412.1	0.4	2.11	0.91	0.49	1.44	0.13	0.81	1.4	1.255	0.7	0.785	1.105
AC004477.3	ENSG00000278765.1	1.77	0	1.02	0.41	0	0.36	0.3	0.82	0.885	0.715	0.18	0.56
AC004490.1	ENSG00000267122.1	0	0.33	0.12	0.21	0.09	0.05	0.12	0.03	0.165	0.165	0.07	0.075
AC004491.1	ENSG00000279996.1	0	0.17	0	0	0	0.07	0.06	0.16	0.085	0	0.035	0.11
AC004494.1	ENSG00000262312.2	0	0	0	0.2	0.05	0.13	0.12	0	0	0.1	0.09	0.06
AC004494.2	ENSG00000278942.1	0.21	0.5	0.94	0	0.38	0	0.52	0	0.355	0.47	0.19	0.26
AC004522.2	ENSG00000237640.1	0.28	0.35	0	0	0	0	0	0	0.315	0	0	0
AC004528.2	ENSG00000274177.1	23.74	42.94	36.95	25.12	38.42	29.8	20.59	40.81	33.34	31.035	34.11	30.7
AC004540.1	ENSG00000214870.8	1.47	0.93	0.36	0	0	1.03	0	0.19	1.2	0.18	0.515	0.095
AC004542.1	ENSG00000269972.1	5.39	0	51.43	9.19	17.62	7.29	21.12	24.44	2.695	30.31	12.455	22.78
AC004542.2	ENSG00000269987.1	16.84	25.36	17.21	14.96	31.09	22.95	20.62	23.41	21.1	16.085	27.02	22.015
AC004556.1	ENSG00000276345.1	26.26	74.86	61.06	81.49	62.06	84.25	49.36	82.68	50.56	71.275	73.155	66.02
AC004584.3	ENSG00000263120.1	0	0	0.3	0.12	0.11	0	0.05	0.16	0	0.21	0.055	0.105
AC004623.1	ENSG00000279488.1	4.52	2	2.32	1.5	3.17	1.26	3.72	1.96	3.26	1.91	2.215	2.84
AC004656.1	ENSG00000260822.1	9.64	8.26	2.94	3.67	2.32	3.13	5.06	3.83	8.95	3.305	2.725	4.445
AC004678.1	ENSG00000275468.1	0.74	0.85	0.48	0	0.82	0.51	0.59	1.17	0.795	0.24	0.665	0.88
AC004678.2	ENSG00000279653.1	0.17	1.34	0.43	0.7	0	0.15	0.67	0.35	0.755	0.565	0.075	0.51
AC004690.2	ENSG00000241345.1	0	0	0.56	0.94	0.3	0.53	1.03	0.4	0	0.75	0.415	0.715
AC004706.1	ENSG00000261996.1	0.6	0	0	1.06	0.35	1.3	0.16	0	0.3	0.53	0.825	0.08
AC004707.1	ENSG00000253102.1	103	15.64	24.5	24.9	84.41	27.28	59.23	26.12	59.32	24.7	55.845	42.675
AC004754.1	ENSG00000269881.1	0	0	0.14	0	0	0	0	0.37	0	0.07	0	0.185
AC004771.1	ENSG00000227495.1	0	0	0.35	0.85	1.27	0	1.22	0.56	0	0.6	0.635	0.89
AC004771.3	ENSG00000262227.1	1.58	2.07	2.75	0.95	2.09	1.64	1.69	0.31	1.825	1.85	1.865	1
AC004771.4	ENSG00000262429.1	1.54	0	0	3.33	1.81	0.57	4.12	3.09	0.77	1.665	1.19	3.605
AC004771.5	ENSG00000262678.1	1.62	0	2.85	0.98	2.5	0.85	4.18	0.98	0.81	1.915	1.675	2.58
AC004801.2	ENSG00000240399.1	0	6.27	0	0.51	1.45	0.89	2.68	0.34	3.135	0.255	1.17	1.51
AC004801.6	ENSG00000276814.1	0	0.39	0	0	0.15	0.32	0.14	0.12	0.195	0	0.235	0.13
AC004803.1	ENSG00000250132.6	1.27	0.75	1.64	1.4	1.62	1.87	1.59	2.8	1.01	1.52	1.745	2.195
AC004812.2	ENSG00000277283.1	0.56	1.73	0.79	1.04	0.75	1.04	0.92	1.3	1.145	0.915	0.895	1.11
AC004816.1	ENSG00000259153.1	3	2	10.34	10.48	5.09	6.35	3.91	6.32	2.5	10.41	5.72	5.115
AC004816.2	ENSG00000275630.1	1.96	13	0	11.21	0	0	0	0	7.48	5.605	0	0
AC004824.1	ENSG00000227751.1	87.67	141.09	14.54	35.71	16.78	37.14	11.78	29.88	114.38	25.125	26.96	20.83
AC004825.2	ENSG00000274818.1	1.67	2.45	1.24	1.48	0	0	0	1.96	2.06	1.36	0	0.98
AC004832.5	ENSG00000273350.1	0	1.19	0	1.07	0.63	0	0	0	0.595	0.535	0.315	0
AC004835.1	ENSG00000230392.1	0	0	0	0.05	0	0	0.04	0.1	0	0.025	0	0.07
AC004839.1	ENSG00000272854.1	0.47	0	0	0.58	1.23	0	0.41	0.77	0.235	0.29	0.615	0.59
AC004846.1	ENSG00000258376.2	0.37	0	0	0	0	0	0.07	0	0.185	0	0	0.035
AC004846.2	ENSG00000258944.1	1.41	0	0.21	0.26	0	0	0.57	0.85	0.705	0.235	0	0.71
AC004854.2	ENSG00000272768.1	19.8	5.79	10.52	7.3	11.43	5.92	15.19	8.06	12.795	8.91	8.675	11.625
AC004865.2	ENSG00000239636.1	0	6.89	0.91	1.11	0	0.19	0.5	0.59	3.445	1.01	0.095	0.545
AC004877.1	ENSG00000273419.1	0.3	0.18	0.75	0.3	0.36	0.61	0.85	0.44	0.24	0.525	0.485	0.645
AC004877.2	ENSG00000280149.1	0	0.44	0	0.4	0.3	0.35	0.87	0.27	0.22	0.2	0.325	0.57
AC004889.1	ENSG00000244198.5	7.48	3.33	0.39	0.52	3.5	1.07	2.32	0.65	5.405	0.455	2.285	1.485
AC004890.2	ENSG00000244560.6	2.51	0.82	1.48	0.62	0.39	0.16	0.41	3.47	1.665	1.05	0.275	1.94
AC004893.1	ENSG00000238109.1	0	0.25	0	0.57	0	0	0.26	0.08	0.125	0.285	0	0.17
AC004906.1	ENSG00000237286.1	2.09	0	0.3	0	0	0.16	0.42	0.12	1.045	0.15	0.08	0.27
AC004908.1	ENSG00000272240.1	0.41	1.08	0.41	0.49	0	0	1.75	0	0.745	0.45	0	0.875
AC004908.2	ENSG00000272812.1	0.74	0.95	0.36	0.44	0.65	1.13	0.94	1.74	0.845	0.4	0.89	1.34
AC004908.3	ENSG00000273402.1	0	0	0	0	0.57	0.32	0.27	0.25	0	0	0.445	0.26
AC004918.1	ENSG00000244701.1	1.66	1.7	0.85	1.3	0.63	1.58	0.58	1.21	1.68	1.075	1.105	0.895
AC004918.3	ENSG00000270157.1	2.04	1.5	0.64	1.57	0.49	0.17	0.45	0.66	1.77	1.105	0.33	0.555
AC004923.1	ENSG00000254610.2	1.65	0.28	0	0.26	0	0	0	0	0.965	0.13	0	0
AC004925.1	ENSG00000279419.1	0.05	0.28	0.29	0.16	0.14	0.55	0.28	0.45	0.165	0.225	0.345	0.365
AC004943.1	ENSG00000259209.3	1	0.52	0.13	0.32	0	0.14	0.93	0.53	0.76	0.225	0.07	0.73
AC004943.2	ENSG00000259768.5	1.38	0.96	6.36	5.5	6.13	4.52	8.17	5.16	1.17	5.93	5.325	6.665
AC004951.1	ENSG00000228434.1	1.43	0.52	0.77	0.72	1.27	0.56	1.98	0.8	0.975	0.745	0.915	1.39
AC004951.4	ENSG00000273432.1	0.3	0.54	0.24	0.24	0.13	0.19	0.46	0.47	0.42	0.24	0.16	0.465
AC004980.1	ENSG00000205485.13	5.82	2.92	2.61	3.39	5.6	3.44	5.73	4.53	4.37	3	4.52	5.13
AC004982.1	ENSG00000272732.1	0	0.4	0.15	0.09	0	0	0	0	0.2	0.12	0	0
AC004982.2	ENSG00000272894.5	0.1	0.32	0.08	0.29	0.17	0.17	0.38	0.32	0.21	0.185	0.17	0.35
AC004987.2	ENSG00000233225.3	0.14	0	0.47	0.44	1	0.51	0	0.1	0.07	0.455	0.755	0.05
AC004997.1	ENSG00000248751.6	0.09	0	0.31	0	0	0	0.28	0.38	0.045	0.155	0	0.33
AC005000.1	ENSG00000228532.4	9.28	0	0	0	0	0	0	6.76	4.64	0	0	3.38
AC005005.3	ENSG00000273387.1	0.33	0.12	0.73	1.45	1.07	0.2	0.43	0.82	0.225	1.09	0.635	0.625
AC005014.1	ENSG00000224280.1	0.05	0	0.04	0	0	0.04	0	0.03	0.025	0.02	0.02	0.015
AC005014.2	ENSG00000272361.2	0	0.88	0.33	0.4	0	0.7	0.58	0.27	0.44	0.365	0.35	0.425
AC005020.1	ENSG00000224448.1	0	0	0	0	0	0	0.74	0.35	0	0	0	0.545
AC005034.3	ENSG00000270696.1	7.87	5.97	5.79	4.91	4.95	4.38	6.27	4.48	6.92	5.35	4.665	5.375
AC005034.4	ENSG00000270996.1	0	0.45	0	0.41	0.17	0.36	0.15	0.14	0.225	0.205	0.265	0.145
AC005034.5	ENSG00000271452.1	2.12	0	0	0	2.33	0.6	0.95	0	1.06	0	1.465	0.475
AC005037.1	ENSG00000183308.6	1.64	0	2.07	0.71	2.32	0.41	2.11	0.78	0.82	1.39	1.365	1.445
AC005041.1	ENSG00000159239.11	1.44	1.72	0.16	0.62	0.52	0.14	0.61	0.48	1.58	0.39	0.33	0.545
AC005046.1	ENSG00000273055.1	1.61	1.21	4.27	1.85	2	2.89	10.26	2.46	1.41	3.06	2.445	6.36
AC005052.1	ENSG00000279601.1	0	0.12	0.28	0.23	0.1	0.15	0.22	0.27	0.06	0.255	0.125	0.245
AC005062.1	ENSG00000243004.5	7.36	18.2	2.77	3.24	0.79	1.92	1.28	0.95	12.78	3.005	1.355	1.115
AC005070.3	ENSG00000272918.1	0.11	0.35	0.52	0.32	0.58	0.09	0.37	0.36	0.23	0.42	0.335	0.365
AC005072.1	ENSG00000272219.1	0	0	0	0.34	0	0	0.26	0	0	0.17	0	0.13
AC005076.1	ENSG00000224046.1	0.48	1.7	1.07	0.52	1.48	1.13	0.58	0.87	1.09	0.795	1.305	0.725
AC005077.4	ENSG00000230882.1	0.44	0.34	0.32	0.12	0.25	0.07	0.28	0.05	0.39	0.22	0.16	0.165
AC005083.1	ENSG00000233834.6	1.26	4.63	0.91	4.01	1.03	0.29	0.82	2.53	2.945	2.46	0.66	1.675
AC005089.1	ENSG00000274080.1	0.45	0.63	0.1	0.39	0.06	0	0.15	0.13	0.54	0.245	0.03	0.14
AC005104.1	ENSG00000223374.1	0	0.88	0	2.4	0.51	1.37	1.61	0.53	0.44	1.2	0.94	1.07
AC005154.2	ENSG00000244480.1	0	0	0.18	0	0.1	0.1	0.25	0.15	0	0.09	0.1	0.2
AC005162.3	ENSG00000272568.5	0	0.16	0.06	0.36	0.07	0.13	0.06	0	0.08	0.21	0.1	0.03
AC005165.1	ENSG00000223561.6	0	0	1.39	0.21	0.54	1.04	0.16	0.26	0	0.8	0.79	0.21
AC005180.2	ENSG00000267505.1	0	0	0	0.91	0	0	0.33	0	0	0.455	0	0.165
AC005183.1	ENSG00000271500.1	0	0.08	0	0	0.13	0.2	0	0.15	0.04	0	0.165	0.075
AC005224.1	ENSG00000231595.1	0.69	0.98	0.33	0.7	0.53	0.26	0.47	0.4	0.835	0.515	0.395	0.435
AC005224.4	ENSG00000266709.1	4.2	2.1	0	0.46	0.81	0.81	0.71	0.61	3.15	0.23	0.81	0.66
AC005225.2	ENSG00000258603.3	1.39	0.4	0.6	0	0.28	0.32	2.14	0.49	0.895	0.3	0.3	1.315
AC005225.4	ENSG00000279026.1	0.07	0	0.05	0.06	0.23	0.11	0	0.09	0.035	0.055	0.17	0.045
AC005229.4	ENSG00000273314.1	1.06	2.14	1.28	2.37	0.88	3.29	1.79	3.07	1.6	1.825	2.085	2.43
AC005253.1	ENSG00000268030.1	2.71	0.95	3.5	2.2	1.96	0.9	2.62	2.15	1.83	2.85	1.43	2.385
AC005253.2	ENSG00000268983.1	9.24	7.55	2.17	10.25	19.38	2.92	9.06	6.79	8.395	6.21	11.15	7.925
AC005261.1	ENSG00000268205.1	2.65	3.94	2.71	3.36	1.73	3.62	2.81	4.18	3.295	3.035	2.675	3.495
AC005261.2	ENSG00000268678.1	0.48	0.18	0	0.33	0.42	0	0.63	0.33	0.33	0.165	0.21	0.48
AC005261.3	ENSG00000268713.1	1.23	1.99	0.65	0.92	1.2	1.6	1.14	0.99	1.61	0.785	1.4	1.065
AC005261.5	ENSG00000279541.1	3.69	4.09	0.93	1.37	2.09	3.3	1.32	3.12	3.89	1.15	2.695	2.22
AC005262.2	ENSG00000267139.1	0.56	0	0	0	0	0	0	0.5	0.28	0	0	0.25
AC005274.1	ENSG00000280168.1	0.45	0.53	0	0.49	0	0.64	0.73	0.16	0.49	0.245	0.32	0.445
AC005277.1	ENSG00000263707.1	1.13	0	0	0	0.97	0	2.46	1.45	0.565	0	0.485	1.955
AC005288.1	ENSG00000266469.1	12.05	10	12.7	7.23	8.88	5.54	13.35	6.85	11.025	9.965	7.21	10.1
AC005306.1	ENSG00000267283.1	8.62	7.91	3.62	9.48	3.54	0	5.32	1.81	8.265	6.55	1.77	3.565
AC005307.1	ENSG00000260725.1	0.29	0.96	0.16	0.29	0.09	0	0.15	0.26	0.625	0.225	0.045	0.205
AC005324.4	ENSG00000255104.7	0	1.06	0	0	0.07	0	0.57	0.19	0.53	0	0.035	0.38
AC005324.5	ENSG00000266261.1	1.86	0.48	0.36	0	0.99	0	0	0	1.17	0.18	0.495	0
AC005329.1	ENSG00000248015.6	1.13	2.34	2.13	1.34	1.61	0.72	1.44	1.11	1.735	1.735	1.165	1.275
AC005329.2	ENSG00000267755.1	13.73	12.29	5.44	1.57	3.96	0	1.86	0	13.01	3.505	1.98	0.93
AC005329.3	ENSG00000280486.1	0.11	0.25	0.57	0.23	0.3	0	0.18	0.08	0.18	0.4	0.15	0.13
AC005330.1	ENSG00000267372.2	0	0.14	0.11	0.26	0.23	0.23	0.2	0	0.07	0.185	0.23	0.1
AC005332.1	ENSG00000265100.1	0.12	0.13	0.1	0.12	0	0.11	0.28	0.33	0.125	0.11	0.055	0.305
AC005332.3	ENSG00000274561.1	0.58	0	0.66	0	0	0	1.57	0.52	0.29	0.33	0	1.045
AC005332.4	ENSG00000274712.1	1.1	1.9	1.78	1.68	1.83	1.35	0.8	1.95	1.5	1.73	1.59	1.375
AC005332.5	ENSG00000277476.1	0.31	0.06	0.71	0.21	0.69	0.59	0.84	0.41	0.185	0.46	0.64	0.625
AC005332.6	ENSG00000278730.1	2.18	1.5	3.9	3.2	4.23	3.23	4.74	2.2	1.84	3.55	3.73	3.47
AC005339.1	ENSG00000268565.1	0	3.87	0	3.48	0.66	3.93	0	3.07	1.935	1.74	2.295	1.535
AC005355.1	ENSG00000250994.1	0.53	0	0	0	0	0	0	0	0.265	0	0	0
AC005358.2	ENSG00000265489.1	0.08	0	0.51	0.11	0.24	0.78	0.41	0.02	0.04	0.31	0.51	0.215
AC005381.1	ENSG00000267243.5	5.9	2.18	0.3	1.23	0.2	1.41	1.19	0.8	4.04	0.765	0.805	0.995
AC005393.1	ENSG00000276445.1	1.08	0.92	0	0	0	0	0.61	0	1	0	0	0.305
AC005394.1	ENSG00000266893.1	0.25	0	0.21	0	0	0	0	0	0.125	0.105	0	0
AC005410.1	ENSG00000241185.2	0	0	0.53	0	0.43	0.88	0	0.47	0	0.265	0.655	0.235
AC005476.2	ENSG00000259146.3	0	0	0.47	0	0	0.48	0.79	0	0	0.235	0.24	0.395
AC005479.1	ENSG00000259005.1	0.71	0	1.37	0.41	1.25	1.08	1.2	0.28	0.355	0.89	1.165	0.74
AC005479.2	ENSG00000270000.1	0.62	2.85	0	3.44	0	1.47	0.57	0	1.735	1.72	0.735	0.285
AC005480.1	ENSG00000258891.1	0	0	0.06	0.15	2.8	1.8	0.53	0.45	0	0.105	2.3	0.49
AC005481.1	ENSG00000222012.1	0.04	0.04	0	0	0	0	0	0	0.04	0	0	0
AC005498.3	ENSG00000269696.1	0.07	0.23	0	0.43	0.13	0.13	0.39	0.1	0.15	0.215	0.13	0.245
AC005519.1	ENSG00000258559.2	1.56	0.88	2.17	1.56	1.65	1.69	2.06	1.86	1.22	1.865	1.67	1.96
AC005520.1	ENSG00000258653.3	0	0.3	0.18	0	0	0.17	0.16	0.12	0.15	0.09	0.085	0.14
AC005520.2	ENSG00000259065.1	0	0	0.83	0	0.36	0	0	0	0	0.415	0.18	0
AC005523.2	ENSG00000269604.1	26.42	17.85	13.69	15.72	16.84	15.52	17.49	16.33	22.135	14.705	16.18	16.91
AC005532.1	ENSG00000230825.1	0	0	0	0.37	0	0	0.27	0	0	0.185	0	0.135
AC005534.2	ENSG00000234450.1	0.61	0	0	0	0	0.72	0	0	0.305	0	0.36	0
AC005540.1	ENSG00000235852.1	13.84	9.07	2.59	2.58	3.32	3.3	3.15	4.1	11.455	2.585	3.31	3.625
AC005562.1	ENSG00000214719.11	1.72	3.08	16.85	21.86	7.64	21.97	12.2	11.73	2.4	19.355	14.805	11.965
AC005578.1	ENSG00000280247.1	0.16	0	0	0.34	0	0	0	0.23	0.08	0.17	0	0.115
AC005586.1	ENSG00000240449.1	0	0	0	1.29	0.97	0.75	0	0	0	0.645	0.86	0
AC005586.2	ENSG00000261305.1	0.21	0	0.37	0.68	0.94	0.2	0	0.46	0.105	0.525	0.57	0.23
AC005592.1	ENSG00000261757.1	1.1	0.1	0	0	0.16	0	0	0.06	0.6	0	0.08	0.03
AC005606.1	ENSG00000260107.1	5.98	6.94	0.48	2.87	4.05	4.46	0.4	2.29	6.46	1.675	4.255	1.345
AC005606.2	ENSG00000261790.1	15.66	20.77	5.01	8.61	5.81	16.89	7.68	10.49	18.215	6.81	11.35	9.085
AC005609.1	ENSG00000278901.1	0.33	0.41	0.63	0	0.29	0	0.55	0.25	0.37	0.315	0.145	0.4
AC005609.2	ENSG00000278907.1	0	0	1.02	0.82	0	0	0.59	0.27	0	0.92	0	0.43
AC005609.3	ENSG00000278915.1	9.89	3.3	8.56	7.76	10.34	5.23	20.49	7.17	6.595	8.16	7.785	13.83
AC005609.4	ENSG00000278946.1	0.58	0	0.65	0.78	1.01	0.66	1.04	2.57	0.29	0.715	0.835	1.805
AC005609.5	ENSG00000279726.1	2.25	0	1.51	1.66	1.18	0.48	2.06	0.84	1.125	1.585	0.83	1.45
AC005618.1	ENSG00000272070.1	0.4	0.52	0.43	0.18	0.16	0.44	0.63	0.32	0.46	0.305	0.3	0.475
AC005618.3	ENSG00000280026.1	2.35	0	1.55	0.94	1.38	0.41	0.33	1.56	1.175	1.245	0.895	0.945
AC005632.2	ENSG00000261596.2	0.43	0	0	0.23	0	0	0	0.15	0.215	0.115	0	0.075
AC005674.2	ENSG00000261490.1	0.79	0.59	0.66	0.98	0.78	0.51	0.58	0.68	0.69	0.82	0.645	0.63
AC005691.1	ENSG00000278860.1	0	0	0	0	0.63	0	2.75	0.71	0	0	0.315	1.73
AC005696.1	ENSG00000262050.1	1.76	0	1.34	0.8	0	0	2.13	1.05	0.88	1.07	0	1.59
AC005696.2	ENSG00000272770.1	11.59	8.87	8.52	11.82	5.98	7.7	9.43	13.51	10.23	10.17	6.84	11.47
AC005696.4	ENSG00000277200.1	5.31	3.57	1.03	1.32	1.15	1.12	1.82	1.88	4.44	1.175	1.135	1.85
AC005697.2	ENSG00000266527.1	0.19	0	0.21	0.32	0.34	0.28	0.49	0.3	0.095	0.265	0.31	0.395
AC005702.1	ENSG00000267318.1	0	0	0	0	0.44	0.01	0.89	0	0	0	0.225	0.445
AC005703.6	ENSG00000279660.1	0	0	0	0	0.1	0	0	0.08	0	0	0.05	0.04
AC005726.1	ENSG00000258472.8	7.74	2	2.35	1.21	2.57	0.79	3.39	1.83	4.87	1.78	1.68	2.61
AC005726.2	ENSG00000264044.1	13.83	4.64	6.25	5.01	8.91	7.38	10.13	6.33	9.235	5.63	8.145	8.23
AC005726.3	ENSG00000264608.1	4.39	1.6	1.22	0	0.96	2.49	6.91	2.41	2.995	0.61	1.725	4.66
AC005726.4	ENSG00000265168.1	8.18	38.26	0	0	9.63	3.37	2.07	24.61	23.22	0	6.5	13.34
AC005726.5	ENSG00000265287.2	3.94	3.08	1.41	2.84	2.56	1.1	1.8	0.84	3.51	2.125	1.83	1.32
AC005746.1	ENSG00000266934.1	0.29	0	0	0	0	0	0.96	0.22	0.145	0	0	0.59
AC005775.1	ENSG00000266933.2	8.51	4.85	8.01	10.03	9.2	10.5	8.04	7.27	6.68	9.02	9.85	7.655
AC005776.2	ENSG00000273218.1	0	0	0.14	0.42	0.08	0.22	0.33	0.06	0	0.28	0.15	0.195
AC005785.1	ENSG00000268189.2	4.38	6.15	4.19	5.59	5.78	6.02	3.35	5.31	5.265	4.89	5.9	4.33
AC005785.2	ENSG00000279203.1	0.95	0.79	0.6	0.36	1.12	0	0.8	0	0.87	0.48	0.56	0.4
AC005786.3	ENSG00000267436.1	22.73	18.21	4.47	9	8.35	5.84	9.03	7.47	20.47	6.735	7.095	8.25
AC005786.4	ENSG00000279590.1	0	0	0	0.95	0	0	0.7	0	0	0.475	0	0.35
AC005821.1	ENSG00000265702.1	0.36	0	0.07	0.13	0	0.17	0	0.08	0.18	0.1	0.085	0.04
AC005822.1	ENSG00000235554.1	0.32	0	0.27	0	0	0.15	0.26	0	0.16	0.135	0.075	0.13
AC005828.3	ENSG00000263644.1	0	0	0.34	0.41	0.31	1.43	0.3	0.82	0	0.375	0.87	0.56
AC005831.1	ENSG00000280202.1	0.27	0.19	0.22	0.09	0.32	0	0	0.24	0.23	0.155	0.16	0.12
AC005833.1	ENSG00000255639.2	2.98	0	0.35	0.32	2.69	0.19	0.35	0.15	1.49	0.335	1.44	0.25
AC005837.1	ENSG00000261335.1	0	0.67	0.43	0.79	0.39	0.85	0.41	0.82	0.335	0.61	0.62	0.615
AC005837.2	ENSG00000267168.1	0	0	0	0	0	0.29	0.55	0	0	0	0.145	0.275
AC005838.2	ENSG00000266538.1	0	6.67	0	0	0	0	1.54	0	3.335	0	0	0.77
AC005839.1	ENSG00000279089.1	0.96	1.02	0.73	0.43	0.58	0.68	0.97	0.17	0.99	0.58	0.63	0.57
AC005840.4	ENSG00000276718.1	0	1.31	0	0.4	0.3	0.35	0	0.53	0.655	0.2	0.325	0.265
AC005863.1	ENSG00000205325.1	0	0	0	0.05	0.08	0	0	0	0	0.025	0.04	0
AC005899.4	ENSG00000265794.5	0.17	0.6	0.16	0.57	0.47	0	0	0	0.385	0.365	0.235	0
AC005899.8	ENSG00000279762.3	0.45	0.1	0.11	0.13	0.08	0	0	0.06	0.275	0.12	0.04	0.03
AC005911.1	ENSG00000278356.1	0.55	0.81	0.62	0.74	0	0.63	3.49	0	0.68	0.68	0.315	1.745
AC005921.2	ENSG00000262967.1	13.94	21.76	9.41	9.81	7.97	15.08	20.69	12.41	17.85	9.61	11.525	16.55
AC005921.3	ENSG00000278963.1	0.07	0.07	0	0	0	0	0	0.09	0.07	0	0	0.045
AC005943.1	ENSG00000267059.2	0.42	0	0.61	0.63	0	0	0.32	1.36	0.21	0.62	0	0.84
AC005944.1	ENSG00000267469.1	7.6	14.82	7.47	12.64	4.36	8.6	3.88	11.7	11.21	10.055	6.48	7.79
AC005962.1	ENSG00000278627.1	0.3	0	0	0	0	0.3	0	0.46	0.15	0	0.15	0.23
AC006001.2	ENSG00000226824.6	3.05	0.62	0	1.13	0	0	1.12	1.12	1.835	0.565	0	1.12
AC006001.3	ENSG00000229180.5	0.78	0.38	0.73	0.65	0.75	0.26	1.06	0.64	0.58	0.69	0.505	0.85
AC006001.4	ENSG00000275400.1	3.73	7.54	2.91	2.26	3.24	3.83	4.29	5.98	5.635	2.585	3.535	5.135
AC006011.1	ENSG00000244563.1	0	25.07	17.21	5.25	0	5.63	0	6.43	12.535	11.23	2.815	3.215
AC006027.1	ENSG00000272638.1	0.75	1.2	4.3	4.97	2.44	3.85	8.62	5.7	0.975	4.635	3.145	7.16
AC006030.1	ENSG00000264324.1	0	0	0	0	0.03	0	0	0	0	0	0.015	0
AC006042.3	ENSG00000233264.2	0.1	0.12	0	0	0.19	0	0	0.07	0.11	0	0.095	0.035
AC006058.1	ENSG00000261786.1	0.54	0.63	0.6	0.53	0.31	0.62	0.83	1.16	0.585	0.565	0.465	0.995
AC006058.3	ENSG00000272121.1	0.15	0.7	0.13	0	0	0.7	0	0.11	0.425	0.065	0.35	0.055
AC006058.4	ENSG00000280435.1	0.36	0.3	0.37	0.55	0.24	0.4	0.7	0.73	0.33	0.46	0.32	0.715
AC006064.2	ENSG00000247853.2	1.32	0.29	0.85	0.46	1.36	0.23	1.02	0.75	0.805	0.655	0.795	0.885
AC006064.4	ENSG00000269968.1	246.21	497.04	173.14	302.82	415.73	324.36	175.26	308.25	371.625	237.98	370.045	241.755
AC006077.2	ENSG00000279799.1	1.1	0.81	1.84	3.66	0.48	1.25	0.99	2.42	0.955	2.75	0.865	1.705
AC006111.2	ENSG00000263235.1	1.39	2.1	0.52	0.48	0.68	0.14	0.37	0.64	1.745	0.5	0.41	0.505
AC006116.10	ENSG00000267776.1	3.15	9.51	2.52	2.13	11.21	1.84	3.13	5.56	6.33	2.325	6.525	4.345
AC006116.7	ENSG00000267459.1	18.85	15.89	10.69	8.82	9.05	10.25	11.31	11.1	17.37	9.755	9.65	11.205
AC006116.8	ENSG00000267549.5	0	0.32	0	0.2	0	0	0.46	0.07	0.16	0.1	0	0.265
AC006122.1	ENSG00000213970.3	0	0	0	0	0.52	1.39	0	0	0	0	0.955	0
AC006128.1	ENSG00000279716.1	4.53	5.06	4.45	5.21	5.41	3.13	3.47	7.19	4.795	4.83	4.27	5.33
AC006130.1	ENSG00000267063.1	0	0	0.39	0.47	0	0	0	1.24	0	0.43	0	0.62
AC006141.1	ENSG00000264895.1	0	0.14	0.05	0	0.06	0.18	0	0.04	0.07	0.025	0.12	0.02
AC006146.1	ENSG00000258660.1	1.66	1.01	0.76	1.23	0	1.61	3.19	0	1.335	0.995	0.805	1.595
AC006160.1	ENSG00000249502.1	0.49	0.59	0.22	0	0	0	0	0.18	0.54	0.11	0	0.09
AC006206.1	ENSG00000256146.1	0	0	0	0	0.07	0	0	0	0	0	0.035	0
AC006206.2	ENSG00000256417.1	0	0	0	0	0	0.3	0.14	0	0	0	0.15	0.07
AC006213.1	ENSG00000266921.1	1.57	1.69	2.02	1.17	0.75	1.37	1.21	1.7	1.63	1.595	1.06	1.455
AC006213.2	ENSG00000267058.1	0.73	0.5	1.43	0.6	0.8	0.99	1.2	2.29	0.615	1.015	0.895	1.745
AC006213.4	ENSG00000277806.1	0.95	1.18	0.3	0.72	1.12	0	1.32	0.24	1.065	0.51	0.56	0.78
AC006213.6	ENSG00000278917.1	0.16	0	0.1	0.03	0	0.17	0.15	0.19	0.08	0.065	0.085	0.17
AC006252.1	ENSG00000243224.1	0.16	0.18	0	0	0	0.14	0	0.33	0.17	0	0.07	0.165
AC006254.1	ENSG00000243696.4	0.35	0.27	0.5	0.37	0.4	0.4	0.69	0.75	0.31	0.435	0.4	0.72
AC006262.1	ENSG00000268460.1	0	0	0	0	0	0.04	0.09	0	0	0	0.02	0.045
AC006270.2	ENSG00000264529.1	0	0	0	0.34	0	0	0.25	0	0	0.17	0	0.125
AC006270.3	ENSG00000272383.1	0	0	0	0	0.14	0	0	0.11	0	0	0.07	0.055
AC006277.1	ENSG00000279452.1	0.19	0.41	0.46	0.95	0.67	1.08	0.44	0.63	0.3	0.705	0.875	0.535
AC006305.1	ENSG00000206129.3	0	0.12	0.31	0.11	0.1	0.05	0.13	0.15	0.06	0.21	0.075	0.14
AC006329.1	ENSG00000232445.1	46.63	66.67	2.46	2.4	4.53	4.18	2.44	6.39	56.65	2.43	4.355	4.415
AC006330.1	ENSG00000280388.1	0.44	0.24	0.3	0.59	0.53	0.19	0.86	0.2	0.34	0.445	0.36	0.53
AC006333.2	ENSG00000272686.1	0.76	1.43	2.98	2.84	2.85	3.35	2	3.42	1.095	2.91	3.1	2.71
AC006372.3	ENSG00000234210.1	0	0	0	0.03	0	0	0.03	0.07	0	0.015	0	0.05
AC006435.1	ENSG00000262456.1	5.1	4.56	4.86	5.81	4.95	1.27	3.69	4.09	4.83	5.335	3.11	3.89
AC006435.2	ENSG00000263345.1	0.59	0	0	0.22	1.4	0.2	3.35	0	0.295	0.11	0.8	1.675
AC006441.3	ENSG00000265784.1	13.28	9.72	3.71	8.09	19.88	9.46	6.48	5.85	11.5	5.9	14.67	6.165
AC006449.3	ENSG00000275665.1	0.38	0	0	0	0.67	0.39	0	0	0.19	0	0.53	0
AC006449.5	ENSG00000277182.1	0.63	0.45	0.79	0.62	0.56	0.43	0.43	1.39	0.54	0.705	0.495	0.91
AC006449.6	ENSG00000277969.1	0.06	0	0.41	0.44	0.34	0.27	0.05	0.33	0.03	0.425	0.305	0.19
AC006449.7	ENSG00000279119.1	1.78	8.39	14.29	14.98	6.17	13.82	4.5	8.89	5.085	14.635	9.995	6.695
AC006460.1	ENSG00000228509.5	0.26	0	0	0	0	0	0	0.32	0.13	0	0	0.16
AC006480.2	ENSG00000273448.1	0.7	0.26	0.39	0	0.31	0.21	0.46	0.24	0.48	0.195	0.26	0.35
AC006486.2	ENSG00000279539.1	0	0.07	0	0.2	0.18	0.06	0.05	0.09	0.035	0.1	0.12	0.07
AC006504.1	ENSG00000261770.1	0.15	0.04	0.12	0.3	0	0	0	0.07	0.095	0.21	0	0.035
AC006504.3	ENSG00000267264.1	0.43	0	0	0	0	0	0.37	0.35	0.215	0	0	0.36
AC006504.5	ENSG00000267575.6	13.28	7.4	3.16	4.4	5.45	5.9	4.69	6.01	10.34	3.78	5.675	5.35
AC006504.8	ENSG00000281468.1	1.26	5.11	0	0	0	0.94	1.05	0.24	3.185	0	0.47	0.645
AC006511.2	ENSG00000255581.1	0.59	0.73	0	0	0	0	0	0	0.66	0	0	0
AC006511.3	ENSG00000279865.1	0	0.09	0	0.25	0	0.07	0.07	0.06	0.045	0.125	0.035	0.065
AC006518.1	ENSG00000256651.1	0	0	0	0	0	0.5	0.43	0	0	0	0.25	0.215
AC006518.2	ENSG00000256682.2	0	0	0.31	0	0.32	0.17	0	0	0	0.155	0.245	0
AC006538.1	ENSG00000261342.1	1.72	1.15	0.94	0.48	0.6	1.19	1.5	1.23	1.435	0.71	0.895	1.365
AC006538.2	ENSG00000267001.1	9.14	0	7.62	14.45	5.97	3.6	10.59	5.39	4.57	11.035	4.785	7.99
AC006539.2	ENSG00000268070.1	0.37	0	0.36	0.44	0.33	0	0.63	0	0.185	0.4	0.165	0.315
AC006547.1	ENSG00000236540.7	3.93	0.25	0.75	0.46	3.61	1.42	2.24	1.07	2.09	0.605	2.515	1.655
AC006547.2	ENSG00000243762.1	15.38	11.45	10.42	5.23	9.78	9.48	10.71	9.02	13.415	7.825	9.63	9.865
AC006547.3	ENSG00000268292.1	2.52	0	0.35	1.69	4.45	2.93	4.88	1.69	1.26	1.02	3.69	3.285
AC006557.1	ENSG00000267150.1	0.45	0.51	0.38	0.63	0	0.55	0.12	0.1	0.48	0.505	0.275	0.11
AC006557.3	ENSG00000267356.1	1.76	0	0.9	0	1.16	0	0.38	0.72	0.88	0.45	0.58	0.55
AC006557.4	ENSG00000267756.1	0	0	0.43	0.01	0.05	0.01	0	0	0	0.22	0.03	0
AC006581.2	ENSG00000282022.1	1.67	1.63	6.22	0	1.46	1.27	1	0.49	1.65	3.11	1.365	0.745
AC006942.1	ENSG00000269194.1	0.44	0	2.67	0	0	0	0	0.36	0.22	1.335	0	0.18
AC006946.2	ENSG00000273203.1	0.1	0	0	0	0	0	0	0	0.05	0	0	0
AC006978.1	ENSG00000235859.5	3.74	2.02	10.13	7.96	6.42	5.58	15.15	7.07	2.88	9.045	6	11.11
AC006994.1	ENSG00000231063.1	0	0	0	0.23	0	0	1.02	0.15	0	0.115	0	0.585
AC007000.1	ENSG00000213542.3	1.02	0	0.4	0	0	0	0	0	0.51	0.2	0	0
AC007000.2	ENSG00000225726.1	0	2.05	0	0	0.86	0.54	0	0	1.025	0	0.7	0
AC007009.1	ENSG00000244239.1	0	1.93	0	4.3	0.55	2.2	0	0.58	0.965	2.15	1.375	0.29
AC007032.1	ENSG00000273320.1	0.21	0.24	0.37	0.45	0.18	0.2	0	0.15	0.225	0.41	0.19	0.075
AC007038.1	ENSG00000229127.1	0.46	0.21	0.16	0.2	0.29	0.06	0.31	0.18	0.335	0.18	0.175	0.245
AC007038.2	ENSG00000272807.1	2.26	2.41	0.45	0.28	0.22	0.24	0.21	0.18	2.335	0.365	0.23	0.195
AC007066.2	ENSG00000261094.2	1.5	1.45	2.42	1.99	1.3	2.05	1.03	1.62	1.475	2.205	1.675	1.325
AC007068.1	ENSG00000213443.2	0.21	0	0.34	0.38	0.61	0.04	1.31	0.33	0.105	0.36	0.325	0.82
AC007098.1	ENSG00000231609.5	1.34	0.31	1.37	0.85	2.03	0.8	0.82	0.38	0.825	1.11	1.415	0.6
AC007114.1	ENSG00000263004.1	0	0.32	1.27	0.59	0.5	0.61	0.65	0.98	0.16	0.93	0.555	0.815
AC007114.2	ENSG00000263089.1	0.03	0.03	0.03	0	0	0	0	0	0.03	0.015	0	0
AC007128.1	ENSG00000229970.3	0	0	0.13	0.09	0.07	0.07	0.19	0.13	0	0.11	0.07	0.16
AC007163.1	ENSG00000230408.3	0.6	0	0	0	0.35	0	0.32	0.14	0.3	0	0.175	0.23
AC007182.1	ENSG00000224721.1	0.54	0.8	0.54	0.6	0.96	0.59	0.84	0.76	0.67	0.57	0.775	0.8
AC007191.1	ENSG00000279407.1	3.15	2.97	2.02	2.18	2.14	1.75	2.47	1.61	3.06	2.1	1.945	2.04
AC007192.2	ENSG00000269145.2	3.76	2.33	0	2.83	0	1.21	0	1.87	3.045	1.415	0.605	0.935
AC007193.1	ENSG00000268810.1	0.57	1.7	0.65	0.77	0	1.32	1.56	0.51	1.135	0.71	0.66	1.035
AC007193.2	ENSG00000269124.1	0.52	0	0	0.67	0	0	0	0.45	0.26	0.335	0	0.225
AC007204.1	ENSG00000273791.1	0	0	0	0	0.69	0.81	0	0	0	0	0.75	0
AC007216.3	ENSG00000261560.1	0	0.11	0.25	0.31	0	0	0	0.14	0.055	0.28	0	0.07
AC007216.4	ENSG00000263307.1	0.38	0	0.38	0.91	0	0.39	0	0	0.19	0.645	0.195	0
AC007218.1	ENSG00000260362.1	2.38	9.16	0	0	0	0	0	0	5.77	0	0	0
AC007225.1	ENSG00000260782.1	0	0.18	0.13	0.16	0.14	0	0.25	0.05	0.09	0.145	0.07	0.15
AC007249.2	ENSG00000257135.5	0.09	0.38	0.14	0	0	0	0	0.06	0.235	0.07	0	0.03
AC007250.1	ENSG00000273063.1	1.1	2.39	0	0	3.77	0	0	0	1.745	0	1.885	0
AC007255.1	ENSG00000223813.2	0.23	1.13	1.25	1.16	0.6	1.32	1.7	1.25	0.68	1.205	0.96	1.475
AC007256.1	ENSG00000213090.2	0	0.11	0.04	0	0	0.13	0	0.07	0.055	0.02	0.065	0.035
AC007272.1	ENSG00000232719.1	0.12	0	0	0.38	0	0	0	0	0.06	0.19	0	0
AC007277.1	ENSG00000213981.8	0.07	0	0	0	0	0	0.1	0	0.035	0	0	0.05
AC007279.1	ENSG00000230799.1	0.42	0.25	0	0.68	0	0	0.69	0.15	0.335	0.34	0	0.42
AC007283.1	ENSG00000234431.2	0	0	2.27	0	0	0.93	0	0	0	1.135	0.465	0
AC007292.1	ENSG00000267980.1	2.49	2.98	2.91	3.55	3.52	1.67	3.45	2.55	2.735	3.23	2.595	3
AC007292.2	ENSG00000269318.1	0.25	0.8	0.2	0.33	0.66	0.29	0.89	0.49	0.525	0.265	0.475	0.69
AC007298.2	ENSG00000257878.1	1.43	0.47	0.36	0	0	0	0	0.44	0.95	0.18	0	0.22
AC007308.1	ENSG00000272600.1	4.26	1.55	3.61	2.78	8.11	1.17	2.54	3.67	2.905	3.195	4.64	3.105
AC007318.1	ENSG00000172974.11	1.16	1.52	1.77	1.62	2.35	2.1	0.73	2.37	1.34	1.695	2.225	1.55
AC007319.1	ENSG00000224063.5	0	0	0	0	0.58	0.4	0.36	0	0	0	0.49	0.18
AC007325.2	ENSG00000277196.4	7.46	10.56	132	123.66	101.48	115.3	109.41	101.55	9.01	127.83	108.39	105.48
AC007325.3	ENSG00000278573.1	0.18	0	0.16	0.2	0	0	0	0.13	0.09	0.18	0	0.065
AC007325.4	ENSG00000278817.1	0.38	0.71	59.76	63.16	58.36	59.06	35.94	66.46	0.545	61.46	58.71	51.2
AC007326.1	ENSG00000271275.1	0.55	0.8	0	0	0	0	0	0.96	0.675	0	0	0.48
AC007336.1	ENSG00000261997.1	0	0.08	0.06	0.07	0.13	0.09	0.08	0.09	0.04	0.065	0.11	0.085
AC007336.3	ENSG00000279030.1	0	0	0.11	0.07	0	0	0	0	0	0.09	0	0
AC007342.1	ENSG00000259926.1	0	0	0	0	0	0	0.22	0	0	0	0	0.11
AC007342.6	ENSG00000279344.1	0.11	0	0.13	0.05	0	0	0.04	0.11	0.055	0.09	0	0.075
AC007342.7	ENSG00000279722.1	0.06	0	0.15	0.18	0.11	0	0.19	0.37	0.03	0.165	0.055	0.28
AC007364.1	ENSG00000231969.1	0.33	0.19	0.97	0.85	0.43	1.2	1.69	0.91	0.26	0.91	0.815	1.3
AC007368.1	ENSG00000255595.1	0.12	0.13	0	0	0	0	0	0	0.125	0	0	0
AC007370.2	ENSG00000250371.1	0.11	0	0	0	0	0	0	0	0.055	0	0	0
AC007375.2	ENSG00000269883.1	1.37	1.41	0.1	0.12	0	0.05	0.14	0.08	1.39	0.11	0.025	0.11
AC007382.1	ENSG00000279519.1	0.54	0.23	0.39	0.54	0.49	0.14	0.72	0.29	0.385	0.465	0.315	0.505
AC007383.2	ENSG00000227946.1	7.5	17.02	1.99	3.44	2.61	2.43	2.69	1.86	12.26	2.715	2.52	2.275
AC007383.3	ENSG00000231955.1	4.61	3.52	2.54	2.91	2.05	2.74	4.56	3.05	4.065	2.725	2.395	3.805
AC007390.2	ENSG00000272054.1	0.58	0.35	0.14	0.07	0.29	0.28	0.39	0.14	0.465	0.105	0.285	0.265
AC007402.1	ENSG00000231918.1	0.07	0	0.03	0.03	0	0	0	0	0.035	0.03	0	0
AC007405.1	ENSG00000234350.4	0.14	0.45	0	0	0	0.06	0.29	0.4	0.295	0	0.03	0.345
AC007405.3	ENSG00000239467.5	0.3	3.2	1.03	0.79	0	0.29	0.74	2.23	1.75	0.91	0.145	1.485
AC007406.5	ENSG00000261799.1	2.17	1.28	2.33	2.01	1.7	2.45	1.84	1.77	1.725	2.17	2.075	1.805
AC007431.3	ENSG00000280028.1	0	0.46	0	0	0	0.36	0.3	0	0.23	0	0.18	0.15
AC007448.3	ENSG00000266473.1	0.28	0	1.02	0	1.73	0.27	0.46	0.62	0.14	0.51	1	0.54
AC007450.4	ENSG00000278654.1	0.43	0	0	0	0	0.91	0	0.35	0.215	0	0.455	0.175
AC007485.2	ENSG00000279059.1	2.71	2.37	2.73	2.09	0.96	1.68	3.66	2.37	2.54	2.41	1.32	3.015
AC007490.1	ENSG00000279427.1	1.35	0.33	0	0	0.24	0	0	0	0.84	0	0.12	0
AC007494.3	ENSG00000279509.1	0.25	0	0	0	0	0.24	0	0	0.125	0	0.12	0
AC007495.1	ENSG00000246379.6	0	0	0	0	0.14	0.05	0	0.04	0	0	0.095	0.02
AC007496.3	ENSG00000280392.1	0	0.17	0.03	0	0.04	0.11	0.12	0	0.085	0.015	0.075	0.06
AC007497.1	ENSG00000275191.1	0.38	0.5	0	0	0	0	0.33	0.91	0.44	0	0	0.62
AC007537.1	ENSG00000242405.2	0	0	0.46	0	0	0	0	0	0	0.23	0	0
AC007541.1	ENSG00000260329.1	0.1	0	0	0.11	0.09	0.19	0	0.14	0.05	0.055	0.14	0.07
AC007563.2	ENSG00000236886.2	0	0	0	0.94	0	0	0.34	0	0	0.47	0	0.17
AC007566.1	ENSG00000244055.1	1.49	0	0	1.13	1.94	0	0.77	0	0.745	0.565	0.97	0.385
AC007608.3	ENSG00000260249.2	0.03	0	0.27	0.03	0	0.13	0.71	0.32	0.015	0.15	0.065	0.515
AC007608.4	ENSG00000278909.1	0.04	0	0.03	0.04	0	0	0.06	0.03	0.02	0.035	0	0.045
AC007610.4	ENSG00000279356.1	0.21	0.3	0.06	0.07	0.06	0.18	0.16	0.09	0.255	0.065	0.12	0.125
AC007611.1	ENSG00000260086.2	1.37	0.35	0	0	0.38	0	0.17	0	0.86	0	0.19	0.085
AC007613.1	ENSG00000262420.3	0.33	0.41	0.79	0.44	1.32	0.48	0.72	0.51	0.37	0.615	0.9	0.615
AC007614.1	ENSG00000279249.1	0.03	0	0	0	0	0	0.01	0	0.015	0	0	0.005
AC007620.2	ENSG00000242539.2	22.31	11.16	9.49	12.87	12.3	15.99	13.25	14.7	16.735	11.18	14.145	13.975
AC007622.2	ENSG00000258136.1	0	0	0.15	0	0.32	0	0.64	0	0	0.075	0.16	0.32
AC007637.1	ENSG00000256139.2	0	0	0	0.2	0.17	0	0	0	0	0.1	0.085	0
AC007663.4	ENSG00000273343.1	2.54	1.19	1.5	0.36	0.56	0.63	0.8	0.73	1.865	0.93	0.595	0.765
AC007666.1	ENSG00000236754.5	0	0	0.07	0.08	0.07	0.5	0	0	0	0.075	0.285	0
AC007679.1	ENSG00000225610.1	3.96	2.49	2.91	1.52	0.62	0.89	4.36	0.85	3.225	2.215	0.755	2.605
AC007681.1	ENSG00000270571.2	0	0.17	0.29	0.28	0.25	0.07	0.22	0.13	0.085	0.285	0.16	0.175
AC007684.1	ENSG00000273035.1	0.51	0	0	0	0	0	0	0.43	0.255	0	0	0.215
AC007686.3	ENSG00000273729.1	12.96	6.43	6.45	7.15	6.95	5.32	6.55	5.35	9.695	6.8	6.135	5.95
AC007728.2	ENSG00000261644.1	0.28	0.16	0	0	0	0	0	0	0.22	0	0	0
AC007731.1	ENSG00000215493.3	0.44	0.1	0.86	0.18	0.47	0.54	1.1	0.3	0.27	0.52	0.505	0.7
AC007743.1	ENSG00000233251.7	0.18	0.2	0.69	0.83	0.65	0.59	1.37	2.54	0.19	0.76	0.62	1.955
AC007744.1	ENSG00000271894.1	0	0	0.33	0.14	0.13	0	0	0.18	0	0.235	0.065	0.09
AC007773.1	ENSG00000267213.4	0.52	0.6	0.3	0	0.62	0.16	0.69	0.12	0.56	0.15	0.39	0.405
AC007780.1	ENSG00000267009.6	0	0	0.87	0.3	0	0	0	0.26	0	0.585	0	0.13
AC007785.3	ENSG00000268401.1	1.25	0	0	0	0	0.47	1.11	0	0.625	0	0.235	0.555
AC007823.1	ENSG00000260743.1	0	0.21	0.08	0.1	0	0.17	0	0.07	0.105	0.09	0.085	0.035
AC007842.1	ENSG00000269069.1	0.57	0.23	0.87	0.14	0.26	0	0.17	0.05	0.4	0.505	0.13	0.11
AC007878.1	ENSG00000281195.1	1.97	0.62	0.77	0.66	1.42	0.41	0.88	0.63	1.295	0.715	0.915	0.755
AC007881.3	ENSG00000272735.1	0	0	0.97	0	0.89	0.68	0.57	0	0	0.485	0.785	0.285
AC007906.2	ENSG00000277639.1	0.56	3	0.12	0	0	0.38	0.22	0.39	1.78	0.06	0.19	0.305
AC007920.1	ENSG00000198491.3	0.16	0	0	0	0	0	0	0	0.08	0	0	0
AC007938.1	ENSG00000259920.1	0	0.1	0.08	0	0	0	0	0	0.05	0.04	0	0
AC007938.2	ENSG00000270823.1	0.32	0.06	0.04	0.11	0.14	0.14	0.08	0	0.19	0.075	0.14	0.04
AC007938.3	ENSG00000270953.1	0	0	0.31	0.75	0.29	0.65	0	0.74	0	0.53	0.47	0.37
AC007952.1	ENSG00000197665.7	0.05	0.09	0	0.35	0	0.25	0.05	0.09	0.07	0.175	0.125	0.07
AC007952.2	ENSG00000228157.4	0.34	1.23	0.98	0.54	0	0.37	0.06	0.41	0.785	0.76	0.185	0.235
AC007952.4	ENSG00000262202.4	1.02	0.81	0	0.8	0	1.14	0.26	0	0.915	0.4	0.57	0.13
AC007952.5	ENSG00000262292.2	0.21	0	0	0	0.18	0.09	0.24	0.07	0.105	0	0.135	0.155
AC007952.6	ENSG00000262319.1	0	0	0	0.03	0.02	0.05	0	0.04	0	0.015	0.035	0.02
AC007956.1	ENSG00000258439.1	0	1.07	0.41	0.49	0	0	0.7	0	0.535	0.45	0	0.35
AC007969.1	ENSG00000233762.3	0	0	0	0	0.5	0.66	0	0.51	0	0	0.58	0.255
AC007996.1	ENSG00000277534.1	2.16	1.24	2.25	1.59	1.88	2.7	3.49	2.75	1.7	1.92	2.29	3.12
AC007998.2	ENSG00000267140.1	1.5	3.35	0	0	1.96	0	1.5	0	2.425	0	0.98	0.75
AC007998.3	ENSG00000267583.5	0	0	0.25	0	0.33	0	0	0	0	0.125	0.165	0
AC008014.1	ENSG00000257261.5	0.19	0	5.33	0.33	1.68	1.79	0.35	0.92	0.095	2.83	1.735	0.635
AC008026.3	ENSG00000264546.1	0	0	0	0.27	0	0.16	0.07	0	0	0.135	0.08	0.035
AC008040.1	ENSG00000239219.2	0.17	0.18	0	0.63	0.04	0.15	0.13	0	0.175	0.315	0.095	0.065
AC008040.2	ENSG00000242583.1	0	0.62	0	0	0	0	0.66	0	0.31	0	0	0.33
AC008040.5	ENSG00000268220.1	3.52	2.37	2.05	3.03	1.79	1.4	2.54	2.13	2.945	2.54	1.595	2.335
AC008073.3	ENSG00000276087.1	0	0	0.05	0.06	0	0	0	0.08	0	0.055	0	0.04
AC008074.2	ENSG00000260101.1	0.08	0	0.19	0	0.07	0	0.12	0.21	0.04	0.095	0.035	0.165
AC008079.1	ENSG00000280007.1	0.08	0.06	0.03	0.06	0.08	0.03	0.07	0.03	0.07	0.045	0.055	0.05
AC008080.1	ENSG00000173862.3	0.62	0.18	0	0	0	0	0	0	0.4	0	0	0
AC008105.1	ENSG00000233175.2	0.37	0.24	0.36	0.37	0.59	0	0.06	0.2	0.305	0.365	0.295	0.13
AC008105.2	ENSG00000233483.2	0.73	2.22	0.99	0.43	0.32	0.37	0.31	0.28	1.475	0.71	0.345	0.295
AC008105.3	ENSG00000267121.5	0.45	1.68	0.05	0.19	0.06	0.06	0.1	0.13	1.065	0.12	0.06	0.115
AC008115.3	ENSG00000275560.1	1.19	0	1.58	0.95	3.15	0	1.02	0.32	0.595	1.265	1.575	0.67
AC008124.1	ENSG00000273015.2	0.85	0.81	0.91	1.25	0.82	1.25	0.91	1.46	0.83	1.08	1.035	1.185
AC008132.1	ENSG00000161103.11	0	0	0.51	0.42	0.22	0.27	0.27	0.4	0	0.465	0.245	0.335
AC008132.2	ENSG00000239989.1	0	0	10.74	4.95	19.4	12.38	7.31	6.46	0	7.845	15.89	6.885
AC008147.2	ENSG00000257298.1	0.17	0.03	0.16	0.09	0.1	0.1	0.27	0.09	0.1	0.125	0.1	0.18
AC008149.1	ENSG00000258177.1	0	0	0	0	0	0	0.37	0	0	0	0	0.185
AC008264.1	ENSG00000224545.1	0.89	1.66	0	0	0.77	0	0	0	1.275	0	0.385	0
AC008264.2	ENSG00000273489.1	4.06	2.69	3.04	2.85	3.65	2.86	4.75	3.7	3.375	2.945	3.255	4.225
AC008267.2	ENSG00000230189.6	1.41	0	2.18	1.87	0.7	0	0.26	1.13	0.705	2.025	0.35	0.695
AC008267.7	ENSG00000279785.1	0	0	0.11	0.28	0	0	0	0	0	0.195	0	0
AC008393.1	ENSG00000245317.2	0	0.12	0.35	0	0.09	0.09	0	0.22	0.06	0.175	0.09	0.11
AC008403.2	ENSG00000268530.5	0.5	0.95	0.43	0.17	0.3	0	0.27	0.35	0.725	0.3	0.15	0.31
AC008429.1	ENSG00000204758.7	0.07	0.28	0.15	0.4	0.06	0	0	0.51	0.175	0.275	0.03	0.255
AC008429.2	ENSG00000253785.1	0.2	0.24	0	0	0	0	0	0	0.22	0	0	0
AC008440.2	ENSG00000232220.2	0.64	0	5.39	0.91	3.93	0.77	1.79	1.2	0.32	3.15	2.35	1.495
AC008443.1	ENSG00000233937.6	8.04	6.83	8.65	8.57	8.83	7.87	8.02	6.71	7.435	8.61	8.35	7.365
AC008443.2	ENSG00000247049.2	0	0	0.74	0	0.33	0	0	0.3	0	0.37	0.165	0.15
AC008443.3	ENSG00000248103.1	0.79	4.18	0.4	5.25	0	2.48	1.02	4.12	2.485	2.825	1.24	2.57
AC008453.1	ENSG00000250309.2	1.91	1.98	2.28	0	0	0	3.54	0	1.945	1.14	0	1.77
AC008467.1	ENSG00000249476.1	0	0.03	0	0	0	0.02	0.02	0.02	0.015	0	0.01	0.02
AC008481.2	ENSG00000213304.3	0.42	0.56	0	0	0.74	0	0.73	0	0.49	0	0.37	0.365
AC008494.3	ENSG00000271797.1	0	0.62	0.16	0.57	0	0.5	0.29	0.25	0.31	0.365	0.25	0.27
AC008507.1	ENSG00000266910.1	0.51	0.61	0.46	0	0	0.49	0	0.93	0.56	0.23	0.245	0.465
AC008507.2	ENSG00000267006.1	0	0	0	0	0	0	0.32	0	0	0	0	0.16
AC008514.1	ENSG00000253348.1	1.04	0	0	0	0	0	0	0	0.52	0	0	0
AC008514.2	ENSG00000253966.1	0	0	0.1	0.12	0.21	0.52	0	0.08	0	0.11	0.365	0.04
AC008522.1	ENSG00000279232.1	5.6	4.63	1.24	1.35	1.13	1.39	1.05	1.73	5.115	1.295	1.26	1.39
AC008537.2	ENSG00000269843.1	0	0	0.53	0	0	0.55	0	0	0	0.265	0.275	0
AC008537.3	ENSG00000279108.1	0.16	0	0.19	0	0.07	0	0	0.05	0.08	0.095	0.035	0.025
AC008543.1	ENSG00000197332.8	0.24	0.09	0.38	0.83	0.9	0.46	0.72	0.45	0.165	0.605	0.68	0.585
AC008555.1	ENSG00000261754.2	0.36	0.77	0.54	0.51	0.41	0.45	0.24	0.54	0.565	0.525	0.43	0.39
AC008555.2	ENSG00000269086.2	0.23	0.11	0.04	0.03	0.09	0	0.08	0.05	0.17	0.035	0.045	0.065
AC008555.5	ENSG00000271109.1	2.24	4.58	0.73	0.44	0.72	0.47	1.4	1.54	3.41	0.585	0.595	1.47
AC008555.8	ENSG00000280106.1	0.6	0.36	0.43	0	0.24	0.18	0.31	0.31	0.48	0.215	0.21	0.31
AC008556.1	ENSG00000277013.1	1.72	1.32	2.21	2.51	2.69	1.83	2.28	3.2	1.52	2.36	2.26	2.74
AC008569.2	ENSG00000267474.1	0	0.23	0.17	0	0	0	0	0	0.115	0.085	0	0
AC008581.1	ENSG00000250615.1	6.32	0	3.19	0	0	2.09	1.54	0.82	3.16	1.595	1.045	1.18
AC008608.2	ENSG00000271737.1	2	0	0	0.96	3.48	0	0	1.9	1	0.48	1.74	0.95
AC008622.2	ENSG00000275719.1	131.07	103.64	24.71	21.56	30.53	20.64	27.3	30.52	117.355	23.135	25.585	28.91
AC008655.1	ENSG00000267815.1	3.86	5.64	0	4.39	0	1.25	0	0	4.75	2.195	0.625	0
AC008663.2	ENSG00000253955.1	0	0.24	0	0	0.27	0	0.07	0	0.12	0	0.135	0.035
AC008669.1	ENSG00000260686.1	0.13	0.43	0.16	0.4	0.48	0	0.41	0.13	0.28	0.28	0.24	0.27
AC008676.1	ENSG00000248544.2	0.4	0.08	0.12	0.08	0.07	0	0.12	0.1	0.24	0.1	0.035	0.11
AC008686.1	ENSG00000267633.1	7.7	3.88	1.34	1.75	5.49	4.49	4.73	1.16	5.79	1.545	4.99	2.945
AC008687.3	ENSG00000268287.1	0	0.44	0	1.21	0.31	0	0	0.8	0.22	0.605	0.155	0.4
AC008731.1	ENSG00000261669.1	0.36	1.41	0	0	0	0.37	0.31	0.85	0.885	0	0.185	0.58
AC008735.1	ENSG00000267096.1	1.8	1.59	0.8	0	1.39	0.85	1.09	0.81	1.695	0.4	1.12	0.95
AC008735.2	ENSG00000267523.1	9.65	4.24	5.22	2.91	6.02	2.93	3.45	6.09	6.945	4.065	4.475	4.77
AC008735.4	ENSG00000276488.1	2.36	1.28	2.25	0.78	2.08	0.68	2.55	1.04	1.82	1.515	1.38	1.795
AC008736.1	ENSG00000267475.1	0	0.49	0.37	0.45	0	0	0	0.89	0.245	0.41	0	0.445
AC008738.3	ENSG00000267580.1	0.89	2.2	64.52	89.58	82.43	113.86	44.99	74.16	1.545	77.05	98.145	59.575
AC008738.5	ENSG00000267727.1	0	0	37.42	21.09	68.74	55.5	33.09	23.74	0	29.255	62.12	28.415
AC008738.7	ENSG00000273420.1	5.15	23.85	1.55	8.84	8.03	4.02	0	12.46	14.5	5.195	6.025	6.23
AC008739.5	ENSG00000279404.1	0.08	0.17	0.19	0	0.34	0.07	0.12	0.15	0.125	0.095	0.205	0.135
AC008741.1	ENSG00000259955.1	3.61	3.07	2.33	1.68	0.4	0.97	2.36	0	3.34	2.005	0.685	1.18
AC008750.1	ENSG00000254760.1	0.96	0	0	0	0	0.52	0	0	0.48	0	0.26	0
AC008750.2	ENSG00000255441.1	0.96	3.74	0.54	1.39	0	0.32	0.27	1.11	2.35	0.965	0.16	0.69
AC008750.7	ENSG00000268889.1	0.39	1.51	0	0	0	0.4	0	0.31	0.95	0	0.2	0.155
AC008752.3	ENSG00000267370.1	0.27	0	0.24	0.29	0	0	0.22	0.39	0.135	0.265	0	0.305
AC008758.3	ENSG00000248406.1	0.08	0.09	0.06	0.16	0	0.36	0.18	0	0.085	0.11	0.18	0.09
AC008758.4	ENSG00000268744.1	0	0	0.27	0	0.05	0	0.13	0.4	0	0.135	0.025	0.265
AC008758.5	ENSG00000268870.1	2.43	0.13	3.92	4.53	2.04	5.2	4.03	3.33	1.28	4.225	3.62	3.68
AC008758.6	ENSG00000269755.1	0	0.36	0	0	0.97	0	0	0.04	0.18	0	0.485	0.02
AC008760.1	ENSG00000269680.1	0.28	0.68	1.55	0.63	0.25	0.82	0.23	0.84	0.48	1.09	0.535	0.535
AC008761.3	ENSG00000279300.1	1.56	1.13	0.34	0	0	0	0	0	1.345	0.17	0	0
AC008763.1	ENSG00000268204.1	0	0.74	0	0	0.19	0.2	0.34	0.6	0.37	0	0.195	0.47
AC008764.10	ENSG00000279977.1	0	0	0	0	0	0	0.06	0.05	0	0	0	0.055
AC008764.2	ENSG00000268087.1	1.67	0	0	0	5.06	2.27	1.65	3.56	0.835	0	3.665	2.605
AC008764.3	ENSG00000268309.1	6.77	1.89	1.45	0.85	5.92	4.37	3.4	2.26	4.33	1.15	5.145	2.83
AC008764.4	ENSG00000268790.5	26.75	3.92	29.27	16.16	33.62	15.02	27.12	28.28	15.335	22.715	24.32	27.7
AC008764.6	ENSG00000269399.2	0.28	0.46	0.4	0.21	0.19	0.06	0.44	0.71	0.37	0.305	0.125	0.575
AC008764.8	ENSG00000279529.1	1.15	1.06	0.38	0.62	0.56	1.05	0.69	0.69	1.105	0.5	0.805	0.69
AC008764.9	ENSG00000279748.1	0	0.06	0.09	0	0	0	0	0	0.03	0.045	0	0
AC008770.1	ENSG00000257355.1	0	1.79	3.46	1.62	1.04	0	0	0	0.895	2.54	0.52	0
AC008770.3	ENSG00000267274.1	0.53	0	0	0	0	0.59	0	0	0.265	0	0.295	0
AC008771.1	ENSG00000249042.5	1.22	4.23	1.79	2.46	1.52	3.45	2.91	2.98	2.725	2.125	2.485	2.945
AC008781.1	ENSG00000228737.2	0	0	0.62	0	0.58	0	1.09	0	0	0.31	0.29	0.545
AC008781.2	ENSG00000246422.2	0	0	0	0.11	0.26	0.1	0	0.04	0	0.055	0.18	0.02
AC008806.1	ENSG00000279936.1	0	0	0	0	0	0.1	0.09	0	0	0	0.05	0.045
AC008813.1	ENSG00000255875.2	0.2	0	0	0	0	0	0	0	0.1	0	0	0
AC008840.1	ENSG00000250240.5	0	0	1.07	0.24	0.95	0	0.31	0.86	0	0.655	0.475	0.585
AC008870.2	ENSG00000260751.2	1.3	0.93	0.83	1.36	0.72	0.3	1.55	1.02	1.115	1.095	0.51	1.285
AC008870.3	ENSG00000261266.2	1.55	0	1.46	0	0.82	0.61	1.55	1.41	0.775	0.73	0.715	1.48
AC008894.2	ENSG00000269243.1	31.49	30.9	27.23	33.74	22.47	29.96	24.83	30.58	31.195	30.485	26.215	27.705
AC008894.3	ENSG00000279198.1	6.12	1.89	2.31	1.61	11.92	1.8	4.36	2.62	4.005	1.96	6.86	3.49
AC008895.1	ENSG00000279948.1	0.44	0.35	0.3	0.27	0	0.19	0.25	0.25	0.395	0.285	0.095	0.25
AC008897.1	ENSG00000242198.1	1.02	0	0	0	3.52	3.12	1.08	0	0.51	0	3.32	0.54
AC008906.1	ENSG00000248734.2	0	0	0	0.96	0.15	0	0	0	0	0.48	0.075	0
AC008914.1	ENSG00000262211.1	2.49	0.27	14.89	5.9	13.05	3.43	15.46	9.99	1.38	10.395	8.24	12.725
AC008915.2	ENSG00000260136.5	5.38	6.34	10.52	12.13	3.86	10.75	6.22	11.4	5.86	11.325	7.305	8.81
AC008937.1	ENSG00000225230.1	0	0.22	0	0.2	0.17	0	0.45	0	0.11	0.1	0.085	0.225
AC008937.3	ENSG00000271828.1	0.44	0.1	0.29	0.18	0.16	0.08	0	0.36	0.27	0.235	0.12	0.18
AC008945.1	ENSG00000272234.1	0.34	0.43	1.3	0.39	0.3	0.68	0	0.26	0.385	0.845	0.49	0.13
AC008957.3	ENSG00000279400.1	1.16	0.49	0.78	0.32	0.98	0.28	1.3	0.21	0.825	0.55	0.63	0.755
AC008966.1	ENSG00000247796.2	0.98	1.01	0.29	0.18	0	0.42	0.43	0.43	0.995	0.235	0.21	0.43
AC008969.1	ENSG00000176593.7	5.77	3.22	6.48	4.03	4.97	3.31	4.79	4.55	4.495	5.255	4.14	4.67
AC008972.1	ENSG00000271926.1	0	0	0	0	0.28	0	0.26	0.24	0	0	0.14	0.25
AC008972.2	ENSG00000272081.1	0	0.66	0	0	0.84	0.52	0.42	1.2	0.33	0	0.68	0.81
AC008982.2	ENSG00000269688.1	1.44	0	0.51	1.21	1.26	0	0.42	0.8	0.72	0.86	0.63	0.61
AC008985.1	ENSG00000278999.1	0.06	0.21	0.05	0.32	0.06	0	0.05	0.04	0.135	0.185	0.03	0.045
AC008993.1	ENSG00000282542.1	1.41	0.28	1.05	0.26	1.88	1.12	1.91	1.54	0.845	0.655	1.5	1.725
AC008993.2	ENSG00000282798.1	0.01	1.28	0.74	1.75	1.99	0.51	1.88	1.82	0.645	1.245	1.25	1.85
AC009005.1	ENSG00000267751.5	3.49	4.55	0.47	6.44	1.98	2.68	2.8	3.93	4.02	3.455	2.33	3.365
AC009032.1	ENSG00000274093.1	0	0.95	0	2.58	0	0.73	0.57	0	0.475	1.29	0.365	0.285
AC009034.1	ENSG00000261113.1	1.46	1.43	0.56	0	1.1	1.43	0.48	0.44	1.445	0.28	1.265	0.46
AC009041.2	ENSG00000260807.6	0.78	3.49	0	0	0.04	0	0.67	0.12	2.135	0	0.02	0.395
AC009041.4	ENSG00000276931.1	0.31	0	0	0	0.55	0	0	0	0.155	0	0.275	0
AC009053.1	ENSG00000214331.8	6.55	3.52	4.14	3.69	3.13	1.95	6.18	3.72	5.035	3.915	2.54	4.95
AC009053.2	ENSG00000261079.1	0.12	0.13	0.44	0	0.38	0.16	0.05	0.04	0.125	0.22	0.27	0.045
AC009054.2	ENSG00000261783.1	0	0	1.19	1.38	0	0	0	0	0	1.285	0	0
AC009055.2	ENSG00000260834.1	12.87	27.13	1.75	4.67	1.14	2.41	0.37	2.55	20	3.21	1.775	1.46
AC009060.1	ENSG00000247228.2	14.8	7.18	5.52	6.5	6.1	5.19	11.21	5.87	10.99	6.01	5.645	8.54
AC009061.1	ENSG00000261320.1	1.02	1.46	0	0	0	0	0	0	1.24	0	0	0
AC009061.2	ENSG00000270049.1	0	0	0.79	1.23	0.73	0.27	2.1	1.28	0	1.01	0.5	1.69
AC009063.2	ENSG00000260788.5	0	0	0.52	1.15	2.36	0.82	0	1.88	0	0.835	1.59	0.94
AC009065.1	ENSG00000259780.3	0.13	0.58	0.33	0.13	0.12	0.7	0.41	0.27	0.355	0.23	0.41	0.34
AC009065.2	ENSG00000259933.6	0	0	0	0	0.3	0.35	0.58	0	0	0	0.325	0.29
AC009065.4	ENSG00000260778.3	0.4	0.53	0.4	0.49	0.37	0	0	0.65	0.465	0.445	0.185	0.325
AC009065.5	ENSG00000261123.1	1.74	0.44	0	0	0	0	0	0	1.09	0	0	0
AC009065.7	ENSG00000261532.1	3.99	5.6	5.29	6.83	6.73	5.55	7.69	10.22	4.795	6.06	6.14	8.955
AC009065.8	ENSG00000261663.1	1.84	1.64	0.2	0.25	0.82	0.22	0.19	0.33	1.74	0.225	0.52	0.26
AC009078.2	ENSG00000240338.5	0	0.14	0.11	0	0	0	0.23	0.41	0.07	0.055	0	0.32
AC009078.3	ENSG00000280152.1	1.93	0.65	1.56	0.72	1.8	0.69	3.81	1.02	1.29	1.14	1.245	2.415
AC009084.2	ENSG00000280334.1	0.1	0	0.2	0.1	0.13	0.04	0.16	0.07	0.05	0.15	0.085	0.115
AC009084.3	ENSG00000280416.1	5.42	6.39	2.79	4.96	6.31	9.18	6.61	7.12	5.905	3.875	7.745	6.865
AC009086.2	ENSG00000277669.1	45.39	40.66	135.68	101.9	90.84	100.23	87.45	104.52	43.025	118.79	95.535	95.985
AC009086.3	ENSG00000279583.1	0.17	0.57	0.14	0	0.15	0.91	0.26	0.35	0.37	0.07	0.53	0.305
AC009088.1	ENSG00000260060.1	1.92	1.25	0	0.92	0	0.2	0.52	0.46	1.585	0.46	0.1	0.49
AC009088.2	ENSG00000260304.1	2.69	1.56	1.19	0.71	0.47	0	0.48	0.47	2.125	0.95	0.235	0.475
AC009088.3	ENSG00000261385.1	0	3.72	11.56	21.56	0	9.71	0.98	4.37	1.86	16.56	4.855	2.675
AC009090.3	ENSG00000276663.1	0	0	0	0	0.33	0	0	0.3	0	0	0.165	0.15
AC009090.4	ENSG00000279019.1	0.98	0.28	0.36	0.11	0.37	0.26	0.72	0.12	0.63	0.235	0.315	0.42
AC009090.5	ENSG00000279803.1	0.7	0.34	0.51	0.13	0.62	0.06	0.59	0.08	0.52	0.32	0.34	0.335
AC009093.3	ENSG00000260908.1	0.08	0.35	0	0.08	0	0	0	0	0.215	0.04	0	0
AC009095.1	ENSG00000237718.2	0.83	0	0.39	0.12	0.21	0	0	0.16	0.415	0.255	0.105	0.08
AC009097.4	ENSG00000261513.1	0	0	0	0	0.42	0.45	0	0.17	0	0	0.435	0.085
AC009102.1	ENSG00000260198.1	0	0.09	0	0	0.07	0.07	0	0	0.045	0	0.07	0
AC009102.2	ENSG00000272372.1	0.55	0.1	0.38	0.28	0.08	0.24	0	0.12	0.325	0.33	0.16	0.06
AC009108.1	ENSG00000243697.1	0	0	0.2	0	0.2	0.64	0.18	0	0	0.1	0.42	0.09
AC009108.3	ENSG00000270020.1	0.04	0	0.03	0	0.14	0.03	0.06	0.1	0.02	0.015	0.085	0.08
AC009113.1	ENSG00000259877.2	0.29	0.82	0.76	0.7	0.58	0.67	0.77	0.89	0.555	0.73	0.625	0.83
AC009113.2	ENSG00000260659.1	1.43	0	0.9	0	1.86	0	0	0.7	0.715	0.45	0.93	0.35
AC009118.2	ENSG00000276131.1	6.01	2.97	1.68	2.04	2.92	2.07	3	4.76	4.49	1.86	2.495	3.88
AC009118.3	ENSG00000276259.1	1	0.47	0.52	0.43	0.53	0.19	0.32	0.29	0.735	0.475	0.36	0.305
AC009119.2	ENSG00000260300.5	3.56	0.24	0.66	0.22	2.8	0.59	0.23	0.53	1.9	0.44	1.695	0.38
AC009120.1	ENSG00000239763.2	2.58	0	0.56	1.34	1.36	0.58	1.38	0	1.29	0.95	0.97	0.69
AC009120.2	ENSG00000259972.2	33.61	23.24	19.19	22.06	38.28	19.37	20.3	20.5	28.425	20.625	28.825	20.4
AC009120.3	ENSG00000260884.1	1.34	0	2.3	1.66	0.39	0	1.16	1.1	0.67	1.98	0.195	1.13
AC009121.1	ENSG00000262703.1	0.3	0.51	0.76	0.78	0.66	0.27	1.19	0.31	0.405	0.77	0.465	0.75
AC009121.2	ENSG00000263080.1	0.92	0	0.48	1.14	0.4	0.99	0.4	0.39	0.46	0.81	0.695	0.395
AC009123.1	ENSG00000250685.7	0.06	0	0.04	0.05	0	0	0	0	0.03	0.045	0	0
AC009126.1	ENSG00000247121.6	0.45	0.07	0.42	0.19	0.4	0.23	0.2	0.26	0.26	0.305	0.315	0.23
AC009133.1	ENSG00000238045.9	93.41	80.82	99.36	91.49	114.8	90.8	98.49	96.36	87.115	95.425	102.8	97.425
AC009133.2	ENSG00000259952.1	183.08	141.05	202.49	143.74	243.76	155.88	191.14	156.84	162.065	173.115	199.82	173.99
AC009133.3	ENSG00000260719.1	2.09	1.99	0.82	0.18	0.89	0.48	1.21	0.31	2.04	0.5	0.685	0.76
AC009133.4	ENSG00000275857.1	6.13	16.48	3.78	11.41	8.79	7.9	5.56	13.04	11.305	7.595	8.345	9.3
AC009137.2	ENSG00000266801.1	0.62	0	0	0	0	0	0	0	0.31	0	0	0
AC009139.1	ENSG00000260922.1	0.91	0	0	0.69	0.27	0.3	1.01	0.23	0.455	0.345	0.285	0.62
AC009139.2	ENSG00000261063.1	3.78	4.41	6.31	3.14	2.67	7.37	5.47	4.17	4.095	4.725	5.02	4.82
AC009148.1	ENSG00000260495.1	0.11	0.17	0.13	0.05	0.09	0.09	0.08	0	0.14	0.09	0.09	0.04
AC009159.3	ENSG00000278058.1	0	0.26	0.2	1.21	0	0.21	0.18	0.65	0.13	0.705	0.105	0.415
AC009163.1	ENSG00000203472.3	2.59	0	0.36	0	0.98	0.76	1.57	0.58	1.295	0.18	0.87	1.075
AC009163.2	ENSG00000260092.1	0.14	0.22	0.04	0.07	0	0	0	0.09	0.18	0.055	0	0.045
AC009163.3	ENSG00000261476.1	1.24	0.72	0.54	0.22	0	0	0.67	0.15	0.98	0.38	0	0.41
AC009163.4	ENSG00000261717.5	8.87	0	1.13	0	1.61	0.75	1.52	1.76	4.435	0.565	1.18	1.64
AC009163.6	ENSG00000274220.1	0.06	0.36	0.09	0.11	0	0.15	0.13	0.33	0.21	0.1	0.075	0.23
AC009166.1	ENSG00000261238.1	0.49	0.68	0	0	0	1.07	0	0	0.585	0	0.535	0
AC009166.2	ENSG00000280344.1	0	0	0	0.05	0	0	0.15	0.07	0	0.025	0	0.11
AC009171.2	ENSG00000263105.1	1.32	0	0	0	0	0	0	1.89	0.66	0	0	0.945
AC009185.1	ENSG00000253653.1	0	0.44	0	0	0.17	0	0.46	0	0.22	0	0.085	0.23
AC009220.2	ENSG00000239254.1	0.09	0.09	0	0	0	0	0	0	0.09	0	0	0
AC009226.1	ENSG00000223725.6	0.41	0	0	0	0	0	0	0.67	0.205	0	0	0.335
AC009245.1	ENSG00000230383.1	0	0	0.41	0.44	0.57	0.19	0	0.29	0	0.425	0.38	0.145
AC009268.1	ENSG00000259505.1	0	0.15	0.11	0.14	0	0	0	0	0.075	0.125	0	0
AC009268.2	ENSG00000278472.1	0.55	0	0	0	0	0.63	0	0.97	0.275	0	0.315	0.485
AC009271.1	ENSG00000267327.1	0.44	0	3.15	0.54	0.39	0.93	3.04	1.44	0.22	1.845	0.66	2.24
AC009283.1	ENSG00000273576.1	0	1.53	2.3	0.35	0.54	1.82	0.26	4.19	0.765	1.325	1.18	2.225
AC009299.2	ENSG00000232320.6	0	0	0	1.12	3.12	1.48	0	0.48	0	0.56	2.3	0.24
AC009299.3	ENSG00000235724.8	0	0	0	0	0.14	0	0.12	0.11	0	0	0.07	0.115
AC009302.1	ENSG00000233868.1	0	1.31	0	0	0	1	0.74	0.78	0.655	0	0.5	0.76
AC009303.4	ENSG00000279227.1	0.31	0.34	0.42	0.21	0.27	0.54	0.64	0	0.325	0.315	0.405	0.32
AC009309.1	ENSG00000273080.1	2.72	0	1.21	5.75	0.48	3.7	1.95	4.29	1.36	3.48	2.09	3.12
AC009318.1	ENSG00000257176.2	0.12	0.13	0.1	0.24	0.05	0	0.09	0.12	0.125	0.17	0.025	0.105
AC009336.3	ENSG00000279160.1	0	0.06	0.04	0	0.15	0	0	0	0.03	0.02	0.075	0
AC009403.1	ENSG00000216895.8	2.34	125.01	1.28	3.48	0.98	2.53	1.92	4.51	63.675	2.38	1.755	3.215
AC009404.1	ENSG00000236255.1	0.5	1.04	1.19	0.4	0.95	1.17	0.8	1.22	0.77	0.795	1.06	1.01
AC009407.1	ENSG00000261829.1	0	0	0.33	0	0	0	0.29	0.27	0	0.165	0	0.28
AC009446.1	ENSG00000254277.1	11.21	19.6	0.59	0.24	0.43	0.21	0	0.32	15.405	0.415	0.32	0.16
AC009487.2	ENSG00000226121.2	0.14	0.17	0.11	0.06	0.05	0.17	0.09	0.07	0.155	0.085	0.11	0.08
AC009495.3	ENSG00000235192.1	0.94	0.83	0	0	0	0	0	0	0.885	0	0	0
AC009506.1	ENSG00000224152.1	1.85	3.84	1.1	2.19	1.1	1.28	0.8	1.04	2.845	1.645	1.19	0.92
AC009509.1	ENSG00000256377.5	0.83	0	0.52	0.77	1.13	1.07	0.27	0.61	0.415	0.645	1.1	0.44
AC009511.2	ENSG00000256747.1	9.68	5.23	3.94	4.79	7.06	3.61	6.12	4.04	7.455	4.365	5.335	5.08
AC009533.1	ENSG00000111788.10	2.4	2.33	1.87	2.05	2.92	2.06	1.75	2.26	2.365	1.96	2.49	2.005
AC009542.1	ENSG00000231794.5	0	0	0.28	0	0.53	0	0	0.79	0	0.14	0.265	0.395
AC009549.1	ENSG00000270607.1	0.18	0	0.07	0	0	0	0.14	0.06	0.09	0.035	0	0.1
AC009570.1	ENSG00000272986.1	0	0	0.45	0.55	0.22	0	0	0.91	0	0.5	0.11	0.455
AC009630.2	ENSG00000253174.2	24.34	24.69	17.27	21	16.36	22.41	21.87	17.7	24.515	19.135	19.385	19.785
AC009630.3	ENSG00000264578.1	19.01	14.83	16.04	14.18	18.65	13.83	18.74	18.31	16.92	15.11	16.24	18.525
AC009654.1	ENSG00000259223.2	0.49	0	0	0	0.22	0	0.2	0	0.245	0	0.11	0.1
AC009686.2	ENSG00000272264.1	0	0	1.78	2.16	1.29	0.75	0.93	0.57	0	1.97	1.02	0.75
AC009690.1	ENSG00000260729.1	0	0	0.03	0	0	0.03	0.16	0	0	0.015	0.015	0.08
AC009690.2	ENSG00000261460.1	0.22	0.62	0.64	0.53	0.52	0.54	0.14	0.88	0.42	0.585	0.53	0.51
AC009779.2	ENSG00000258056.2	3.42	3.07	1.76	2.5	2.66	2.57	1.59	2.83	3.245	2.13	2.615	2.21
AC009779.3	ENSG00000258311.5	2.57	0.63	1.23	0.97	0.88	0	0.63	0.54	1.6	1.1	0.44	0.585
AC009812.1	ENSG00000251867.3	0	0	0.4	0.65	0.42	0.28	0	0	0	0.525	0.35	0
AC009812.3	ENSG00000254162.1	0	0.04	0.18	0.07	0	0	0.2	0.12	0.02	0.125	0	0.16
AC009812.4	ENSG00000260317.1	0.08	0	0.2	0.33	0.15	0.07	0.32	0.06	0.04	0.265	0.11	0.19
AC009831.1	ENSG00000263823.1	9.59	6	9.29	9.12	7.69	6.64	9.22	9.25	7.795	9.205	7.165	9.235
AC009878.1	ENSG00000278840.1	10.82	6.98	1.81	0	1.86	6.83	1.16	0	8.9	0.905	4.345	0.58
AC009902.2	ENSG00000254027.1	0	0.48	0	0	0	0	0.32	0.59	0.24	0	0	0.455
AC009902.3	ENSG00000272425.1	0.13	0	0	0	0	0	0	0	0.065	0	0	0
AC009927.1	ENSG00000250031.1	0	0	0	0.17	0.07	0.07	0.33	0	0	0.085	0.07	0.165
AC009948.1	ENSG00000238082.1	0	0	0.24	0	0.23	0	0.44	0.78	0	0.12	0.115	0.61
AC009948.2	ENSG00000270277.1	0.5	0.45	0.07	0.08	0.07	0.15	0.13	0.55	0.475	0.075	0.11	0.34
AC009948.3	ENSG00000270956.1	0	0.7	0	0.32	0.25	0.56	0.24	0.43	0.35	0.16	0.405	0.335
AC009948.4	ENSG00000279598.1	0.09	0.13	0	0	0.06	0.03	0.05	0	0.11	0	0.045	0.025
AC009955.4	ENSG00000269068.1	7.67	0.53	6.86	6.32	13.86	3.78	11.08	5.82	4.1	6.59	8.82	8.45
AC009961.1	ENSG00000226266.6	1.56	1.83	0.89	0.23	0.63	0	0	1.41	1.695	0.56	0.315	0.705
AC009962.1	ENSG00000260742.1	0	0	0	0.11	0.03	0.09	0	0.02	0	0.055	0.06	0.01
AC009996.1	ENSG00000259659.1	1.21	0	0	0	0.27	0	0.5	0.91	0.605	0	0.135	0.705
AC010132.2	ENSG00000234983.1	0.64	0.54	0	0.17	0.42	0	0.38	0.33	0.59	0.085	0.21	0.355
AC010132.3	ENSG00000256646.7	0.24	2.84	0.14	1.33	1.96	2.15	1.08	0.68	1.54	0.735	2.055	0.88
AC010132.4	ENSG00000261019.1	0	0.13	0.28	0.23	0.1	0.1	0.09	0	0.065	0.255	0.1	0.045
AC010148.1	ENSG00000235726.5	0	0.1	0.4	0	0	0	0.68	0	0.05	0.2	0	0.34
AC010163.1	ENSG00000229543.1	0	0	0.45	0	0.77	0.92	0	0	0	0.225	0.845	0
AC010168.2	ENSG00000261324.2	0.68	0.58	0.47	0.29	0.09	0.41	0.63	0.36	0.63	0.38	0.25	0.495
AC010173.1	ENSG00000258101.2	0	0.12	0.35	0.22	0.28	0.57	0	0.22	0.06	0.285	0.425	0.11
AC010186.2	ENSG00000256594.7	3.19	2.3	3.66	4.15	4.14	4.12	3.29	3.54	2.745	3.905	4.13	3.415
AC010186.3	ENSG00000257027.1	0.97	0.8	0.92	0.79	0.51	1.24	1.81	0.98	0.885	0.855	0.875	1.395
AC010198.1	ENSG00000246331.2	0	0	0.08	0	0	0	0	0.07	0	0.04	0	0.035
AC010200.1	ENSG00000257803.2	0	0.12	0	0.22	0	0	0.17	0	0.06	0.11	0	0.085
AC010201.2	ENSG00000271327.1	0	0	0	0.31	0.64	0.09	0.24	0.49	0	0.155	0.365	0.365
AC010203.1	ENSG00000257489.6	1.31	2.16	3.19	2.33	2.26	1.32	2.66	4	1.735	2.76	1.79	3.33
AC010207.1	ENSG00000260633.1	0.08	0.08	0.12	0.3	0	0	0	0.05	0.08	0.21	0	0.025
AC010226.1	ENSG00000249249.1	2.16	0	0.21	1.84	2.76	1.99	1.56	0.17	1.08	1.025	2.375	0.865
AC010240.2	ENSG00000235253.1	0	0	0.11	0.41	0.24	0	0.21	0	0	0.26	0.12	0.105
AC010245.1	ENSG00000248881.1	0.24	0	0	0.27	0	0	0.6	0.18	0.12	0.135	0	0.39
AC010260.1	ENSG00000251675.1	3.53	0.36	0.27	1.99	4.69	1.73	3.17	1.55	1.945	1.13	3.21	2.36
AC010261.2	ENSG00000251187.5	0	0	0	0.42	0.31	0	0	0	0	0.21	0.155	0
AC010271.1	ENSG00000268366.1	0	0	0	0	0.68	0.8	0.66	0.61	0	0	0.74	0.635
AC010285.1	ENSG00000249412.1	0	0	1.1	0	0	0	0	0.29	0	0.55	0	0.145
AC010300.1	ENSG00000267934.1	0.13	0.03	0.04	0.03	0	0.14	0.08	0.09	0.08	0.035	0.07	0.085
AC010306.1	ENSG00000253213.1	1.17	0	0	0	0	0	0.12	0.3	0.585	0	0	0.21
AC010307.3	ENSG00000249478.1	0	0	0	0.04	0	0	0.03	0	0	0.02	0	0.015
AC010319.1	ENSG00000254503.1	0.13	0.14	0	0	0	0	0.2	0	0.135	0	0	0.1
AC010319.3	ENSG00000269053.1	0.52	1.5	0	0.68	0	0	0.47	0	1.01	0.34	0	0.235
AC010319.4	ENSG00000269481.1	0.83	0.68	0.25	1.24	0	0.27	1.14	0.41	0.755	0.745	0.135	0.775
AC010320.2	ENSG00000268015.1	0.37	0.89	0	0	0	0	0	0	0.63	0	0	0
AC010320.4	ENSG00000269535.1	0	0	0.06	0	0	0.14	0.06	0	0	0.03	0.07	0.03
AC010326.3	ENSG00000269867.1	0.28	0	2.89	3.52	4.28	2.22	3.3	1.06	0.14	3.205	3.25	2.18
AC010326.4	ENSG00000270804.1	4.87	4.52	12.06	10.8	10.79	9.4	10.03	11.19	4.695	11.43	10.095	10.61
AC010327.3	ENSG00000267577.1	0.09	0.5	0	0.28	0.16	0.24	0.07	0	0.295	0.14	0.2	0.035
AC010327.4	ENSG00000267649.1	0	0	0	0.27	0.18	0.58	0.17	0	0	0.135	0.38	0.085
AC010327.5	ENSG00000276570.1	1.79	1.2	1.79	1.5	1.31	1	1.28	1.43	1.495	1.645	1.155	1.355
AC010328.1	ENSG00000267943.1	0	0	0.03	0.07	0	0.03	0	0.02	0	0.05	0.015	0.01
AC010329.1	ENSG00000268416.1	0	0	0	0.02	0.06	0.01	0	0	0	0.01	0.035	0
AC010329.5	ENSG00000280171.1	0	0	0.05	0	0	0	0	0	0	0.025	0	0
AC010331.1	ENSG00000277383.1	0.36	2.32	0.35	1.27	2.23	1.47	0	1.97	1.34	0.81	1.85	0.985
AC010335.1	ENSG00000268199.2	1.03	1.75	3.31	2.01	5.18	1.04	3.2	1.07	1.39	2.66	3.11	2.135
AC010336.1	ENSG00000214248.2	0.84	0.83	0.84	0.82	0.85	0.62	0.91	0.6	0.835	0.83	0.735	0.755
AC010336.2	ENSG00000260500.1	1.83	0	0	0	0	0	0	0.38	0.915	0	0	0.19
AC010336.3	ENSG00000268120.1	15.79	6.83	8.4	4.95	8.02	1.72	4.61	4.83	11.31	6.675	4.87	4.72
AC010336.4	ENSG00000268149.1	3.59	4.53	2.08	2.46	4.71	0.7	1.64	2.18	4.06	2.27	2.705	1.91
AC010336.6	ENSG00000269813.1	1.7	0	0.86	0.52	1.12	0	2.2	1.03	0.85	0.69	0.56	1.615
AC010342.1	ENSG00000226432.3	0	0.69	0	0.21	0	0.94	0.17	0	0.345	0.105	0.47	0.085
AC010359.1	ENSG00000269961.1	0	0	1.42	0	0	1.47	0	0.38	0	0.71	0.735	0.19
AC010401.1	ENSG00000262732.1	1.02	0.18	0.09	0.97	0.27	1.14	0.25	0.07	0.6	0.53	0.705	0.16
AC010422.2	ENSG00000268945.1	0.32	0.39	1.48	0.36	0	0	0.53	0.48	0.355	0.92	0	0.505
AC010422.3	ENSG00000269242.1	2.57	0	3.61	9.8	3.19	2.67	1.23	0.23	1.285	6.705	2.93	0.73
AC010422.6	ENSG00000269693.1	0.75	0.64	0.44	1.15	0.53	0.65	1.43	0.85	0.695	0.795	0.59	1.14
AC010424.1	ENSG00000249577.1	1.66	4.88	0	0	0	0	0	0	3.27	0	0	0
AC010435.1	ENSG00000279557.1	0	0	0	0	0.24	0	0.43	0.09	0	0	0.12	0.26
AC010463.3	ENSG00000269815.1	3.73	0	0.98	0	0	0	0.41	1.17	1.865	0.49	0	0.79
AC010478.1	ENSG00000259663.2	0	0	8.84	5.79	8.04	7.41	8.81	5.52	0	7.315	7.725	7.165
AC010480.1	ENSG00000279883.1	0.56	0	0.26	0.95	1	0	0.47	0.21	0.28	0.605	0.5	0.34
AC010487.1	ENSG00000268225.1	0.47	1.24	1.19	1.3	1.11	1.14	0.87	0.97	0.855	1.245	1.125	0.92
AC010487.2	ENSG00000269646.1	0	0	0.52	0	0	0	0	0.42	0	0.26	0	0.21
AC010491.1	ENSG00000261360.1	0	0.05	0.16	0.1	0	0	0	0.23	0.025	0.13	0	0.115
AC010501.1	ENSG00000271714.1	3.45	1.06	2.49	1.28	2.61	2.63	2.74	1.7	2.255	1.885	2.62	2.22
AC010503.1	ENSG00000268191.1	2.18	1.18	0	0	0	0	0	0	1.68	0	0	0
AC010503.4	ENSG00000275234.1	8.38	7.84	14.11	11.25	11.12	11.15	11.53	13.93	8.11	12.68	11.135	12.73
AC010504.1	ENSG00000267219.1	0.36	0	0	0.42	0	0	0	0	0.18	0.21	0	0
AC010507.1	ENSG00000282051.1	10.28	14.69	13.76	14.14	11.63	6.4	6.09	3.86	12.485	13.95	9.015	4.975
AC010522.1	ENSG00000268750.6	8.97	4.06	17.11	9.78	12.58	8.32	24.76	8.79	6.515	13.445	10.45	16.775
AC010530.1	ENSG00000270165.1	0.37	0	0.73	0	0	0	1.27	0.29	0.185	0.365	0	0.78
AC010531.1	ENSG00000131152.4	0.88	0	0.68	0	1.79	0.28	0	0.82	0.44	0.34	1.035	0.41
AC010531.6	ENSG00000270006.2	0	0	0	1.07	0	0.91	2.06	0	0	0.535	0.455	1.03
AC010531.7	ENSG00000270082.1	1.07	1.54	0	0	0.47	0	0	2.32	1.305	0	0.235	1.16
AC010533.1	ENSG00000278893.1	0	0	0	0.07	0	0.06	0.05	0	0	0.035	0.03	0.025
AC010536.1	ENSG00000226180.3	1.37	1.41	1.14	0.97	0.97	0.62	1.31	0.69	1.39	1.055	0.795	1
AC010536.3	ENSG00000277504.1	0.42	0	1.27	2.03	0.74	0	3.24	0.34	0.21	1.65	0.37	1.79
AC010542.4	ENSG00000261519.3	0.15	0.08	0	0.46	0.07	0.2	0.24	0.52	0.115	0.23	0.135	0.38
AC010542.5	ENSG00000277978.1	0	2.84	4.38	1.27	0	0	1.58	0	1.42	2.825	0	0.79
AC010547.4	ENSG00000261611.5	0	0.12	0.21	0.16	0.43	0.28	0	0.2	0.06	0.185	0.355	0.1
AC010615.1	ENSG00000213976.4	4.48	3.87	4.35	1.79	3.92	2.99	5.01	2.78	4.175	3.07	3.455	3.895
AC010615.2	ENSG00000268119.5	31.9	16.68	16.58	7.16	15.82	10.74	16.18	10.05	24.29	11.87	13.28	13.115
AC010618.3	ENSG00000269439.5	5.18	1.96	4.16	2.31	8.98	2.29	5.76	2.57	3.57	3.235	5.635	4.165
AC010619.2	ENSG00000273189.1	0	0.32	0.09	0	0.1	0	0	0	0.16	0.045	0.05	0
AC010624.1	ENSG00000204666.3	0	0	0	0	0	0	0.08	0	0	0	0	0.04
AC010624.2	ENSG00000267890.1	3.55	8.55	0.36	0.87	0.65	0.75	0.94	0.29	6.05	0.615	0.7	0.615
AC010632.1	ENSG00000267345.1	0.37	0	0	0	0	0	0	0	0.185	0	0	0
AC010636.2	ENSG00000269110.1	0	0	0	0	1.55	0	0	0.13	0	0	0.775	0.065
AC010642.1	ENSG00000269794.1	0.13	0.44	0.33	0.54	0.12	0.12	0.1	0	0.285	0.435	0.12	0.05
AC010643.1	ENSG00000268686.1	0	0.14	0	0.04	0.04	0	0.03	0	0.07	0.02	0.02	0.015
AC010646.1	ENSG00000269095.1	0	0	0	0	0.03	0.14	0	0	0	0	0.085	0
AC010653.2	ENSG00000279592.1	4.54	5.96	8.36	7.07	5.83	5.72	7.25	8.83	5.25	7.715	5.775	8.04
AC010654.1	ENSG00000277369.1	0	0.52	0.59	0	0.39	0.21	0.72	0.16	0.26	0.295	0.3	0.44
AC010655.2	ENSG00000240758.2	0.76	0.36	1.37	0.66	0	0	0	0.44	0.56	1.015	0	0.22
AC010655.3	ENSG00000272601.1	2.61	0	0	6.93	3.48	2.61	5.65	2.54	1.305	3.465	3.045	4.095
AC010680.1	ENSG00000267784.1	0	0	0	0.04	0.03	0	0	0.03	0	0.02	0.015	0.015
AC010680.2	ENSG00000270574.1	0.21	0.6	0.11	0.21	0.49	0	0.27	0.37	0.405	0.16	0.245	0.32
AC010680.3	ENSG00000271011.1	0.44	0	0.45	1.61	1.15	1.39	0.76	0.71	0.22	1.03	1.27	0.735
AC010680.4	ENSG00000271141.1	0	0	1.21	1.95	1.43	0	0.35	0.65	0	1.58	0.715	0.5
AC010719.1	ENSG00000270933.1	0.25	0.3	0.22	0.82	0.44	0.71	0.2	0.73	0.275	0.52	0.575	0.465
AC010729.1	ENSG00000236106.1	0.09	0.56	0.07	0.26	0	0.08	0.2	0.06	0.325	0.165	0.04	0.13
AC010733.2	ENSG00000267520.2	0	0.33	0.47	0.16	0.25	0.46	0.16	0.19	0.165	0.315	0.355	0.175
AC010735.1	ENSG00000261379.1	0	0	0	0.17	0.43	0	0	0.11	0	0.085	0.215	0.055
AC010761.1	ENSG00000264577.1	3.08	3.34	1.51	2.05	1.03	2.33	1.39	1.78	3.21	1.78	1.68	1.585
AC010761.2	ENSG00000265073.1	1.18	0.88	0	3.2	1.54	0.68	0.54	1.83	1.03	1.6	1.11	1.185
AC010761.3	ENSG00000265205.1	2.34	0.65	0.98	0	1.24	0	1.23	0	1.495	0.49	0.62	0.615
AC010761.4	ENSG00000265474.1	1.74	3.51	3.99	8.54	6.88	6.45	10.16	8.15	2.625	6.265	6.665	9.155
AC010761.5	ENSG00000265840.1	3.76	0	4.78	5.24	3.14	8.44	2.53	3.46	1.88	5.01	5.79	2.995
AC010776.2	ENSG00000267774.2	0.3	0.17	2.96	3.01	2.56	3.74	1.21	2.53	0.235	2.985	3.15	1.87
AC010809.1	ENSG00000259287.2	0	0	1.13	0.91	0.67	0	0.65	1.21	0	1.02	0.335	0.93
AC010809.2	ENSG00000259408.2	0.53	0	0.15	0.74	0.16	0.16	0.14	0.37	0.265	0.445	0.16	0.255
AC010834.1	ENSG00000253722.1	7.42	7.01	8.3	7.97	8.99	8.53	9.05	6.53	7.215	8.135	8.76	7.79
AC010834.3	ENSG00000253854.1	0.36	0.21	0.47	0	0.48	0.17	0.44	0.64	0.285	0.235	0.325	0.54
AC010857.1	ENSG00000272479.1	0	0	0	0	0	0.35	0.59	0	0	0	0.175	0.295
AC010864.1	ENSG00000273008.1	0.1	0.45	0.17	0.51	0.27	0.18	0.16	0.07	0.275	0.34	0.225	0.115
AC010883.1	ENSG00000234936.1	0	1.22	0	0	0	0	0.7	0	0.61	0	0	0.35
AC010894.2	ENSG00000226853.2	0	0	0.99	0	0	0	0	0.3	0	0.495	0	0.15
AC010894.3	ENSG00000236449.1	0.11	0.06	0.09	0.4	0.35	0.05	0.09	0	0.085	0.245	0.2	0.045
AC010900.1	ENSG00000232479.2	0.36	0.14	0	0	0	0.22	0.38	0.17	0.25	0	0.11	0.275
AC010913.1	ENSG00000272702.1	0	0.06	0.04	1.03	0	0	0	0	0.03	0.535	0	0
AC010931.2	ENSG00000248540.2	0.05	0.06	0	0	0	0	0	0	0.055	0	0	0
AC010969.2	ENSG00000269973.1	1.48	0.97	0.83	1.41	1.08	1.2	1.5	1.17	1.225	1.12	1.14	1.335
AC010973.2	ENSG00000244151.1	2.72	3.9	3.79	6.26	8.86	4.9	2.76	4.26	3.31	5.025	6.88	3.51
AC010976.1	ENSG00000231731.7	0.85	0.5	0.19	0.23	0.95	0.2	0	0.15	0.675	0.21	0.575	0.075
AC010978.1	ENSG00000235522.6	2.39	0	1.59	2.39	3.16	3.31	2.73	1.59	1.195	1.99	3.235	2.16
AC010980.1	ENSG00000237732.9	0	0	0	0.29	1.13	0	0	0.39	0	0.145	0.565	0.195
AC010980.2	ENSG00000267034.1	0	0	0	0.34	0	0	0.09	0.3	0	0.17	0	0.195
AC010998.2	ENSG00000271670.1	0	0.4	0	0.74	2	0.64	1.35	0.25	0.2	0.37	1.32	0.8
AC010999.2	ENSG00000276524.1	0	0.89	0.33	0	0	0.7	0.59	0	0.445	0.165	0.35	0.295
AC011005.1	ENSG00000230626.3	0.13	0	0	0	0	0	0.11	0	0.065	0	0	0.055
AC011005.4	ENSG00000243230.1	1.24	0.55	0	1.01	0	0.87	0.71	0	0.895	0.505	0.435	0.355
AC011008.2	ENSG00000280294.1	0.21	0.36	0.17	0.16	0.45	0.32	0.32	0.11	0.285	0.165	0.385	0.215
AC011043.1	ENSG00000276256.1	6.72	8.73	4.46	6.26	4.16	4.05	4.47	5.52	7.725	5.36	4.105	4.995
AC011043.2	ENSG00000278198.1	0.28	0.19	0.13	0.18	0.12	0.37	0.02	0.07	0.235	0.155	0.245	0.045
AC011270.2	ENSG00000279694.1	0.73	1.02	0.09	0	0.2	0.05	0.04	0	0.875	0.045	0.125	0.02
AC011290.2	ENSG00000236015.1	1.3	0.51	0.38	0.94	0.38	0.41	1.23	0.16	0.905	0.66	0.395	0.695
AC011298.1	ENSG00000219159.4	0	0	0.07	0.12	0	0.04	0.19	0.24	0	0.095	0.02	0.215
AC011306.1	ENSG00000272180.1	0.12	0	0	0.51	0.17	0.11	0.68	0	0.06	0.255	0.14	0.34
AC011330.2	ENSG00000275601.1	0.63	0.39	0.3	0	0	0.63	0.26	0.48	0.51	0.15	0.315	0.37
AC011337.1	ENSG00000271795.1	0.17	0.13	0.57	0.46	0.3	0.11	0.71	0.28	0.15	0.515	0.205	0.495
AC011365.2	ENSG00000254192.1	0.22	0	0.59	0	0	0.21	0.18	0	0.11	0.295	0.105	0.09
AC011379.2	ENSG00000254363.6	0	0	0.04	0	0.04	0.06	0.02	0	0	0.02	0.05	0.01
AC011405.1	ENSG00000249593.6	0	0	0	0.24	0	0.21	0.18	0.11	0	0.12	0.105	0.145
AC011442.1	ENSG00000266936.1	0	0	0	0	0.77	0	0.9	0.99	0	0	0.385	0.945
AC011445.1	ENSG00000268262.1	2.92	3.99	0.51	0.97	0	0	0.7	0.21	3.455	0.74	0	0.455
AC011446.1	ENSG00000267512.1	73	44.05	25.67	32.72	35.11	31.17	29.61	34.22	58.525	29.195	33.14	31.915
AC011446.2	ENSG00000267598.1	93.46	70.94	33.02	32.06	44.44	39.88	32	46.65	82.2	32.54	42.16	39.325
AC011447.1	ENSG00000224864.4	5.77	0	1.17	3.33	4.02	5.48	3.85	4.53	2.885	2.25	4.75	4.19
AC011447.3	ENSG00000267383.6	55.36	32.75	28.08	29.04	24.56	28.36	41.78	25.32	44.055	28.56	26.46	33.55
AC011447.6	ENSG00000279039.1	1.32	1.41	0.35	0.27	0.54	0.48	1.19	0.54	1.365	0.31	0.51	0.865
AC011447.7	ENSG00000280079.1	31.85	25.62	14.47	14.66	11.38	14.63	16.17	10.67	28.735	14.565	13.005	13.42
AC011448.1	ENSG00000258674.5	2.62	3.23	4.4	1.22	3.43	1.63	2.15	1.63	2.925	2.81	2.53	1.89
AC011451.2	ENSG00000270614.1	0.69	0	0	0	0.31	0.35	0	0.8	0.345	0	0.33	0.4
AC011453.1	ENSG00000269842.3	0.13	0.28	0.05	0	0.12	0	0.05	0.09	0.205	0.025	0.06	0.07
AC011462.1	ENSG00000255730.4	0.08	0	0	0	0	0	2.42	0.81	0.04	0	0	1.615
AC011462.4	ENSG00000277744.1	0	1.69	0.65	0	1.5	0	1.55	0.51	0.845	0.325	0.75	1.03
AC011466.1	ENSG00000268583.1	0.76	0.49	0.37	0	0	0	0.64	0	0.625	0.185	0	0.32
AC011466.3	ENSG00000269534.5	0.57	0	0	0	0	0	0.17	0.21	0.285	0	0	0.19
AC011468.1	ENSG00000260160.1	0.57	0	0.8	0.65	0.76	1.12	2.85	0.43	0.285	0.725	0.94	1.64
AC011468.2	ENSG00000267827.5	1.07	0	2.08	2.33	0	0	0.79	0.83	0.535	2.205	0	0.81
AC011468.5	ENSG00000275055.1	0.74	2.37	0.22	0.27	0.66	2.13	0.81	0.54	1.555	0.245	1.395	0.675
AC011472.3	ENSG00000267576.1	2.48	9.26	3.64	6.08	4.23	7.26	4.9	5.54	5.87	4.86	5.745	5.22
AC011472.4	ENSG00000273733.1	1.45	0	0	0.61	0	0	0.42	0	0.725	0.305	0	0.21
AC011472.5	ENSG00000279807.1	0.91	0	0	0.56	0	0	0	0	0.455	0.28	0	0
AC011476.3	ENSG00000267265.5	3.6	2.4	1.17	0.47	1.92	0.44	1.61	0	3	0.82	1.18	0.805
AC011477.1	ENSG00000267419.2	2.5	1.58	0	0.78	0.86	0.11	0	1.87	2.04	0.39	0.485	0.935
AC011477.2	ENSG00000267481.1	0.37	0.43	0.65	1.19	0.33	0.35	1.05	0.4	0.4	0.92	0.34	0.725
AC011477.3	ENSG00000267565.1	4.99	5.87	0.9	0	3.72	0.9	6.09	3.5	5.43	0.45	2.31	4.795
AC011479.1	ENSG00000267748.4	0	0.69	0	0	1.86	2.72	0	0.42	0.345	0	2.29	0.21
AC011479.3	ENSG00000269653.1	0	0.17	0.19	0	0	0	0.06	0.16	0.085	0.095	0	0.11
AC011481.3	ENSG00000280087.1	0.1	0.08	0	0.07	0.04	0	0	0.09	0.09	0.035	0.02	0.045
AC011484.1	ENSG00000204850.4	0.74	1.83	0.3	0.15	0.66	0	0.17	0.54	1.285	0.225	0.33	0.355
AC011487.1	ENSG00000213777.5	0	0.52	0.53	0.68	0.23	0	0.93	0.7	0.26	0.605	0.115	0.815
AC011487.4	ENSG00000274892.1	0	1.15	0	0	0.75	0	0.74	0	0.575	0	0.375	0.37
AC011491.2	ENSG00000269444.1	1.15	0	0	0	0.5	0	0	1.03	0.575	0	0.25	0.515
AC011495.2	ENSG00000268636.1	0	1.8	0	0	3.21	1.34	0	3.17	0.9	0	2.275	1.585
AC011495.3	ENSG00000268677.1	1.26	0.98	0	0	0.55	0	0	0	1.12	0	0.275	0
AC011497.2	ENSG00000269374.1	6.86	4.66	5.86	3.56	6.34	3.71	5.72	3.55	5.76	4.71	5.025	4.635
AC011498.2	ENSG00000267030.1	2.86	1.08	1.64	4.45	0.72	0	3.86	1.31	1.97	3.045	0.36	2.585
AC011498.4	ENSG00000267385.1	0.58	0.36	0.45	0.14	0.15	0	0.25	0.38	0.47	0.295	0.075	0.315
AC011498.6	ENSG00000267769.1	0.45	0	0.93	1.12	0.79	0	0	1.11	0.225	1.025	0.395	0.555
AC011498.7	ENSG00000280239.1	3.04	1.72	2.34	1.95	2.64	1.33	2.19	1.45	2.38	2.145	1.985	1.82
AC011500.3	ENSG00000269792.1	1.84	1.52	1.15	0.35	1.35	0.91	1.27	0.46	1.68	0.75	1.13	0.865
AC011503.1	ENSG00000269289.5	0	0	0	0	0.17	0	0.07	0.13	0	0	0.085	0.1
AC011503.2	ENSG00000269397.1	1.12	0.34	0.17	0.52	0.73	0.18	0.32	0.41	0.73	0.345	0.455	0.365
AC011511.1	ENSG00000167807.15	1.06	0.66	0.29	0.36	0.28	0.68	0.09	0.52	0.86	0.325	0.48	0.305
AC011511.3	ENSG00000267105.1	0	3.82	0	5.09	0.83	1.42	0	1.12	1.91	2.545	1.125	0.56
AC011511.5	ENSG00000267607.1	0.44	0.19	0.21	0.04	0.04	0.04	0.13	0.26	0.315	0.125	0.04	0.195
AC011558.1	ENSG00000279753.1	344.15	844.54	290.76	408.4	265.83	450.99	229.29	421.83	594.345	349.58	358.41	325.56
AC011603.2	ENSG00000258017.1	1193.36	2470.48	1541.65	2018.29	1579.44	1919.09	1493.1	2044.29	1831.92	1779.97	1749.27	1768.69
AC011611.3	ENSG00000257453.1	10.86	15.52	6.24	3.55	9.91	4.99	5.41	8.25	13.19	4.895	7.45	6.83
AC011611.4	ENSG00000257839.1	0.23	0	0	0	0	0	0	0.17	0.115	0	0	0.085
AC011611.5	ENSG00000257941.1	0.37	0	0	0.43	0	0	0	0.57	0.185	0.215	0	0.285
AC011676.5	ENSG00000280035.1	0	0.11	0.04	0.16	0.05	0	0.17	0	0.055	0.1	0.025	0.085
AC011700.1	ENSG00000274895.1	0	0	0	0	0.05	0.09	0	0	0	0	0.07	0
AC011773.3	ENSG00000258256.1	0	0	0	0	0.2	0	0	0.28	0	0	0.1	0.14
AC011773.4	ENSG00000260493.1	0.25	0.28	0	0	0.22	0.11	0.1	0	0.265	0	0.165	0.05
AC011815.1	ENSG00000268573.1	0.94	0.53	0.62	0.49	0.64	0.62	0.72	0.55	0.735	0.555	0.63	0.635
AC011815.2	ENSG00000274184.1	0	0.08	0	0	0	0.13	0.06	0	0.04	0	0.065	0.03
AC011815.3	ENSG00000279989.1	4.13	0	1.68	0	1.36	1.73	1.38	1.33	2.065	0.84	1.545	1.355
AC011825.3	ENSG00000263917.1	0.42	1.43	0	0	0	0	0	0.29	0.925	0	0	0.145
AC011825.4	ENSG00000265008.1	4.65	0	0.56	0.67	2.27	1.73	0.92	0	2.325	0.615	2	0.46
AC011840.1	ENSG00000231421.7	0	0	0.99	3.04	0	0.93	0	0.48	0	2.015	0.465	0.24
AC011840.2	ENSG00000259928.1	0	0	2.56	1.73	2.15	1.52	3.07	1.9	0	2.145	1.835	2.485
AC011841.1	ENSG00000273496.1	0.28	0.19	0.13	0.18	0.12	0.37	0.02	0.07	0.235	0.155	0.245	0.045
AC011899.1	ENSG00000231980.1	0.08	0.08	0	0	0	0	0	0	0.08	0	0	0
AC011912.1	ENSG00000279145.1	0.26	0.22	0.06	0.11	0.04	0.02	0.11	0.05	0.24	0.085	0.03	0.08
AC011921.1	ENSG00000259349.1	0	0	0	0.47	0	0	0.33	0.31	0	0.235	0	0.32
AC011933.2	ENSG00000264853.1	0.2	0.05	0	0.05	0.09	0.13	0.08	0.07	0.125	0.025	0.11	0.075
AC011939.3	ENSG00000275638.1	0	0.77	1.75	2.78	0.47	0.6	0.95	0	0.385	2.265	0.535	0.475
AC011944.1	ENSG00000177699.4	0	0	0.06	0.47	0.14	0.14	0.18	0.05	0	0.265	0.14	0.115
AC011978.2	ENSG00000261542.1	0.57	0.69	0.23	0.14	0.13	0.37	0.44	0.14	0.63	0.185	0.25	0.29
AC012065.4	ENSG00000270100.1	1.14	0	0	0	0	0	0.24	0	0.57	0	0	0.12
AC012073.1	ENSG00000271936.1	4.42	3.82	4.36	5.35	4.32	3.75	3.74	4.59	4.12	4.855	4.035	4.165
AC012074.1	ENSG00000235072.2	0.29	0.11	0	0	0	0	0.15	0.13	0.2	0	0	0.14
AC012085.1	ENSG00000186076.5	15.27	19.58	11.61	13.2	8.94	11.75	13.23	15.83	17.425	12.405	10.345	14.53
AC012085.2	ENSG00000258274.1	0	0	0.16	0.39	0	0	0	0	0	0.275	0	0
AC012123.1	ENSG00000228835.1	0.09	0	0	0	0	0	0	0.12	0.045	0	0	0.06
AC012146.1	ENSG00000234327.7	6.33	26.7	2.31	8.84	4.28	4.9	0.67	5.99	16.515	5.575	4.59	3.33
AC012157.1	ENSG00000258034.1	0	0.64	0.49	0	0.41	0	0.41	0	0.32	0.245	0.205	0.205
AC012173.1	ENSG00000260350.1	4.35	0.96	1.47	0	3.8	0	0	0.57	2.655	0.735	1.9	0.285
AC012181.1	ENSG00000261114.1	0	0	1.75	1.52	0.24	1.06	1.12	1.21	0	1.635	0.65	1.165
AC012181.2	ENSG00000261270.1	0.34	0	0	0.4	0	0	0	0	0.17	0.2	0	0
AC012184.1	ENSG00000260111.1	12.37	4.96	14.33	6.19	8.42	5.37	6.86	5.77	8.665	10.26	6.895	6.315
AC012184.2	ENSG00000260537.1	1.85	2.96	4.05	0	7.5	8.71	7.88	7.48	2.405	2.025	8.105	7.68
AC012184.3	ENSG00000261777.5	0	1.59	0.85	1.05	0.17	0.18	1.58	0.98	0.795	0.95	0.175	1.28
AC012213.1	ENSG00000253477.5	0	0	2.17	0.29	0.69	0	0.73	0.96	0	1.23	0.345	0.845
AC012213.2	ENSG00000261670.1	0	0	0	0	0.03	0	0.02	0.04	0	0	0.015	0.03
AC012213.3	ENSG00000266289.1	0	0	0	0.26	0.21	0.45	0	0	0	0.13	0.33	0
AC012213.4	ENSG00000271830.1	0	1.93	0	0	1.67	0	1.01	1.13	0.965	0	0.835	1.07
AC012254.3	ENSG00000267724.1	2.07	5.51	1.72	3.02	2.09	3.8	2.35	2.43	3.79	2.37	2.945	2.39
AC012306.2	ENSG00000272667.1	2.23	11.16	5.71	6.94	2.82	3.8	4.53	4.13	6.695	6.325	3.31	4.33
AC012309.1	ENSG00000267360.6	0	0	0.91	0	0	0.54	0	0	0	0.455	0.27	0
AC012313.1	ENSG00000232098.3	4.7	6.25	5.03	3.15	7.28	7.41	8.01	6.77	5.475	4.09	7.345	7.39
AC012313.10	ENSG00000279611.1	0.93	0.21	0.96	0.79	1.15	0.17	1.04	0.52	0.57	0.875	0.66	0.78
AC012313.2	ENSG00000268049.1	1.82	2.67	1.3	1.3	0.87	0.25	1.22	1.54	2.245	1.3	0.56	1.38
AC012313.3	ENSG00000268230.5	0.29	0.22	0.3	0.27	0.39	0.49	0.51	0.03	0.255	0.285	0.44	0.27
AC012313.4	ENSG00000268543.1	0.48	0.66	0	0	0	0.52	0.42	1.19	0.57	0	0.26	0.805
AC012313.5	ENSG00000268912.1	0.57	0.55	0	0.11	0.25	0.4	0.53	0.49	0.56	0.055	0.325	0.51
AC012313.6	ENSG00000269054.1	0.23	0.81	0.82	0	0.41	0	2.42	0.17	0.52	0.41	0.205	1.295
AC012313.7	ENSG00000269106.1	0	2.24	0	1.01	1.8	0.86	0.65	0.67	1.12	0.505	1.33	0.66
AC012313.8	ENSG00000269473.1	0.2	0.05	0	0.07	0.07	0.04	0.02	0.05	0.125	0.035	0.055	0.035
AC012313.9	ENSG00000273901.1	0	0.4	0	0	0.28	0.31	1.06	0.72	0.2	0	0.295	0.89
AC012317.2	ENSG00000279756.1	0.19	0.21	0	0.06	0	0	0	0	0.2	0.03	0	0
AC012321.1	ENSG00000260772.1	0	2.34	2.37	1.93	2.82	3.71	0.48	2.25	1.17	2.15	3.265	1.365
AC012358.2	ENSG00000227799.1	0.97	0.36	0.53	0.11	0.38	0.1	0.17	0.07	0.665	0.32	0.24	0.12
AC012358.3	ENSG00000240401.8	0.85	0	0.16	0	0	0	0	0	0.425	0.08	0	0
AC012360.3	ENSG00000272994.1	0.97	1.12	1	1.31	1.3	0.87	0.87	1.22	1.045	1.155	1.085	1.045
AC012363.1	ENSG00000224789.1	1.84	0	1.08	0.43	0.32	0	0.62	0	0.92	0.755	0.16	0.31
AC012368.1	ENSG00000225889.7	0.51	2.71	0	0.31	0.18	0.35	0.16	0.14	1.61	0.155	0.265	0.15
AC012377.1	ENSG00000246863.2	0	0	0.04	0.05	0.05	0.05	0	0.03	0	0.045	0.05	0.015
AC012414.5	ENSG00000260409.1	0.33	0.11	0.08	0.1	0	0	0	0	0.22	0.09	0	0
AC012435.1	ENSG00000260103.2	0.12	0.13	0.59	1.3	0.4	0.29	0.7	0.7	0.125	0.945	0.345	0.7
AC012442.1	ENSG00000228251.1	0	0	0	0.52	0.37	0	0	0	0	0.26	0.185	0
AC012464.1	ENSG00000257283.1	0	0	0.41	0.49	1.08	0	0.35	0	0	0.45	0.54	0.175
AC012464.2	ENSG00000258303.1	0	0	0.21	0.25	0	0	0	0.51	0	0.23	0	0.255
AC012467.2	ENSG00000271976.1	2.54	2.14	2.13	1.7	1.68	1.49	2.18	2.08	2.34	1.915	1.585	2.13
AC012485.1	ENSG00000225057.2	0.06	0	0	0	0	0	0	0	0.03	0	0	0
AC012501.2	ENSG00000242575.1	0	0	0.1	0	0	0	0	0	0	0.05	0	0
AC012508.2	ENSG00000260634.1	0.1	0.12	0	0	0	0	0	0	0.11	0	0	0
AC012510.1	ENSG00000273466.1	6.31	1.16	0.87	0.8	2.15	0.93	1.39	2.48	3.735	0.835	1.54	1.935
AC012512.1	ENSG00000226539.1	3.15	0.95	0.24	0.87	1.16	0.25	0.65	0.39	2.05	0.555	0.705	0.52
AC012513.2	ENSG00000236478.2	0	0.32	0.12	0.15	0.13	0	0.23	0.39	0.16	0.135	0.065	0.31
AC012513.3	ENSG00000279348.1	9.44	4.1	4.17	2.61	2.7	1.75	6.95	4.03	6.77	3.39	2.225	5.49
AC012557.1	ENSG00000271843.1	1.67	0	0	0	0	0.34	0.28	0.26	0.835	0	0.17	0.27
AC012569.1	ENSG00000267293.1	0.6	0.33	0.58	0.1	0.09	0	0	0.07	0.465	0.34	0.045	0.035
AC012603.1	ENSG00000271849.1	0.42	0	0.86	0.52	0	1.34	0	0.69	0.21	0.69	0.67	0.345
AC012615.1	ENSG00000261526.2	1.94	1.89	1.11	3.1	1.08	1.85	0.86	2.65	1.915	2.105	1.465	1.755
AC012615.2	ENSG00000267007.1	13.23	18.82	7.85	16.29	17.12	20.59	11.48	25.2	16.025	12.07	18.855	18.34
AC012615.3	ENSG00000267125.2	28.94	56.57	17.1	21.08	17.23	15.14	16.34	21.38	42.755	19.09	16.185	18.86
AC012615.5	ENSG00000267232.1	1.45	0.93	0	0	1.28	0.37	0	0.28	1.19	0	0.825	0.14
AC012615.6	ENSG00000267244.5	2.82	1.68	1.93	1.13	2.73	0.63	3.76	1.91	2.25	1.53	1.68	2.835
AC012617.1	ENSG00000267053.6	1.3	1.39	0.36	2.93	0.17	0.11	1.05	0.88	1.345	1.645	0.14	0.965
AC012618.1	ENSG00000213293.4	0	0	1.68	0	0	0	0	0.65	0	0.84	0	0.325
AC012618.2	ENSG00000234750.1	0.21	0.24	1.82	0.67	2.21	0.58	2.69	1.19	0.225	1.245	1.395	1.94
AC012618.3	ENSG00000234773.6	7.95	2.6	4.25	1.99	6.75	1.73	6.9	2.52	5.275	3.12	4.24	4.71
AC012640.2	ENSG00000259802.1	3.45	3.78	3.17	2.66	1.36	2.5	4.63	2.04	3.615	2.915	1.93	3.335
AC012640.4	ENSG00000271980.1	19.68	28.77	7.55	16.72	13.05	15.91	11.05	16.86	24.225	12.135	14.48	13.955
AC012645.1	ENSG00000250616.2	0.09	0.9	0.37	1.2	0.33	1.54	0.86	1.23	0.495	0.785	0.935	1.045
AC012645.4	ENSG00000275371.1	0	0.18	0.26	0.16	0.28	0.57	0	0.54	0.09	0.21	0.425	0.27
AC012651.1	ENSG00000258461.5	0.15	0	0.5	0.54	0.43	0.36	0.83	0.47	0.075	0.52	0.395	0.65
AC012653.1	ENSG00000259477.1	0	0	0	0.19	0.16	0	0	0	0	0.095	0.08	0
AC012653.2	ENSG00000274719.1	0	0	0.79	5.57	3.99	3.16	1.21	0	0	3.18	3.575	0.605
AC012676.1	ENSG00000262712.1	4.76	5.16	2.39	1.51	4.11	1.99	2.17	2.37	4.96	1.95	3.05	2.27
AC012676.3	ENSG00000277170.1	1.51	1.43	0.54	0	0	0	0	0.43	1.47	0.27	0	0.215
AC012676.5	ENSG00000280063.1	4.07	2.86	1.59	0.6	1.61	0.73	1.17	0.55	3.465	1.095	1.17	0.86
AC013268.1	ENSG00000186148.11	0.15	0.92	0.36	0.29	0.35	0	0.42	0	0.535	0.325	0.175	0.21
AC013268.3	ENSG00000235721.1	0	0	0	0.12	0.11	0.05	0	0	0	0.06	0.08	0
AC013275.1	ENSG00000231013.1	0	0	0	0	0	0	0.11	0	0	0	0	0.055
AC013356.3	ENSG00000259364.1	0	0.92	0	0.42	0.32	0	0	0	0.46	0.21	0.16	0
AC013394.1	ENSG00000279765.3	1.76	0.51	0.75	0.44	1.16	0.87	1.08	0.48	1.135	0.595	1.015	0.78
AC013403.2	ENSG00000272148.1	1.01	0	1.08	0	3.09	1.11	0	0	0.505	0.54	2.1	0
AC013452.2	ENSG00000259656.1	0	0	0	0	0.22	0.48	0	0	0	0	0.35	0
AC013460.1	ENSG00000229727.6	0	0	0	0	0.06	0.75	0	0.09	0	0	0.405	0.045
AC013472.1	ENSG00000205500.8	0	0	0	0.07	0	0.07	0.12	0.05	0	0.035	0.035	0.085
AC013472.3	ENSG00000272056.1	0	0	0	1.68	0	0.29	1.24	0	0	0.84	0.145	0.62
AC013489.3	ENSG00000279945.1	9.68	43.45	9.49	30.4	10.45	35.13	8.4	24.87	26.565	19.945	22.79	16.635
AC013553.3	ENSG00000277351.1	0	0	0.31	0	0.29	0	0.56	0.51	0	0.155	0.145	0.535
AC013564.1	ENSG00000274995.1	0.27	0	0	1.19	1.66	0.52	0.22	0.99	0.135	0.595	1.09	0.605
AC013643.3	ENSG00000279302.1	0	0	0.09	0	0	0	0.04	0.04	0	0.045	0	0.04
AC013652.1	ENSG00000259345.5	0	0.54	0.39	1.67	0	0	0.71	0.17	0.27	1.03	0	0.44
AC013726.1	ENSG00000259793.1	0.06	0.07	0	0	0	0	0.05	0	0.065	0	0	0.025
AC013731.1	ENSG00000270557.1	0	0	0.34	1.05	0.35	0.18	0.16	0.98	0	0.695	0.265	0.57
AC015563.2	ENSG00000264982.1	2.13	2.82	3.18	4.4	3.57	4.06	7.33	5.16	2.475	3.79	3.815	6.245
AC015674.1	ENSG00000264558.1	334.89	585.07	244.63	178.21	205.35	324.01	199.81	343.8	459.98	211.42	264.68	271.805
AC015688.6	ENSG00000266872.1	3.9	7.04	6.7	4.41	6.63	7.67	4.98	6.55	5.47	5.555	7.15	5.765
AC015712.2	ENSG00000259583.2	0.82	0.42	0.21	0.28	0.04	0.23	0.03	0.2	0.62	0.245	0.135	0.115
AC015726.1	ENSG00000270091.1	0.28	0.35	0.26	1.91	0.25	0.55	2.11	0.21	0.315	1.085	0.4	1.16
AC015799.1	ENSG00000279432.1	0.32	0.48	0.18	0.35	0.24	0.04	0.31	0.15	0.4	0.265	0.14	0.23
AC015802.1	ENSG00000267078.1	0	0	0.53	0.32	0	0.19	0.08	0.07	0	0.425	0.095	0.075
AC015802.4	ENSG00000267546.2	0.82	0	0	0.67	0	0	0	0	0.41	0.335	0	0
AC015813.1	ENSG00000264112.1	5.06	1.37	4.65	3.8	4.38	2.67	7.5	3.18	3.215	4.225	3.525	5.34
AC015813.2	ENSG00000266086.1	1.65	0.37	0.8	1.06	0.9	0.3	0.79	2.93	1.01	0.93	0.6	1.86
AC015813.3	ENSG00000266290.1	0.04	0.05	0.03	0	0	0	0	0	0.045	0.015	0	0
AC015813.5	ENSG00000279069.1	115.62	25.21	26.42	17.62	72.98	17.87	44.33	22.05	70.415	22.02	45.425	33.19
AC015813.6	ENSG00000279207.1	2.9	1.87	2.83	2.28	2.67	2.02	4.65	2.58	2.385	2.555	2.345	3.615
AC015813.7	ENSG00000280233.1	0	0	0.7	0	0.32	0.74	0	0	0	0.35	0.53	0
AC015818.2	ENSG00000260907.1	0.84	0.74	2.22	2.81	1.37	1.98	0.51	2.33	0.79	2.515	1.675	1.42
AC015849.4	ENSG00000270894.1	0	0	0	0	1.7	1.57	0	0	0	0	1.635	0
AC015849.5	ENSG00000270977.1	0.47	0.13	0.16	0.19	0.24	0.23	0.42	0.24	0.3	0.175	0.235	0.33
AC015853.1	ENSG00000262905.1	0.35	0	0	0.82	0	0	0	0	0.175	0.41	0	0
AC015871.3	ENSG00000278600.1	0.77	0.69	0.77	0.45	0.86	0.56	0.59	0.72	0.73	0.61	0.71	0.655
AC015883.1	ENSG00000279281.1	0.07	0.3	0.06	0.14	0.13	0.12	0	0	0.185	0.1	0.125	0
AC015908.3	ENSG00000264016.2	0	0.36	0	0	0	0	0.48	0	0.18	0	0	0.24
AC015909.5	ENSG00000279792.1	0.06	0.21	0.31	0	0.28	0.06	0.35	0.08	0.135	0.155	0.17	0.215
AC015912.1	ENSG00000262112.1	9.04	1.64	0.83	0	5.43	0.43	2.83	3.97	5.34	0.415	2.93	3.4
AC015912.3	ENSG00000274213.1	0	4.17	1.62	12.96	0	9.26	0	6.1	2.085	7.29	4.63	3.05
AC015920.1	ENSG00000278972.1	0	0.13	0	0	0.05	0	0.05	0	0.065	0	0.025	0.025
AC015921.1	ENSG00000262884.1	0.22	0	0	0	0.15	0.05	0.04	0.04	0.11	0	0.1	0.04
AC015922.2	ENSG00000265519.1	2.05	6.34	0	1.88	1.76	0	2.16	0	4.195	0.94	0.88	1.08
AC015922.3	ENSG00000276855.1	5.84	5.09	4.85	6.22	5.42	5.41	6.2	5.79	5.465	5.535	5.415	5.995
AC015961.1	ENSG00000267651.1	0	0	0.06	0.07	0	0	0.27	0	0	0.065	0	0.135
AC015961.2	ENSG00000267707.2	0.27	0	0.5	0	0.48	0.79	0	0.2	0.135	0.25	0.635	0.1
AC015971.1	ENSG00000228363.2	0.45	0	0.37	0.53	1.08	0.73	1.23	0.45	0.225	0.45	0.905	0.84
AC015982.1	ENSG00000272606.1	0	2.31	0.59	4.89	0.47	4.2	0.95	4.17	1.155	2.74	2.335	2.56
AC015987.1	ENSG00000224746.1	0	0	0	0.24	0.4	0	0	0	0	0.12	0.2	0
AC016026.1	ENSG00000093100.13	0.2	1.1	0	1.4	0.51	0.36	0.5	1.19	0.65	0.7	0.435	0.845
AC016027.1	ENSG00000225335.3	19.52	11.31	11.78	7.72	13.42	7.98	18.63	8.47	15.415	9.75	10.7	13.55
AC016044.1	ENSG00000259203.1	5.2	10.56	1.45	1.32	4.59	0.76	2.52	0.88	7.88	1.385	2.675	1.7
AC016065.1	ENSG00000246089.3	3.99	6.42	6.52	6.41	6.59	7.5	5.17	10.72	5.205	6.465	7.045	7.945
AC016168.3	ENSG00000280122.1	0.13	0	0	0	0	0.07	0	0.14	0.065	0	0.035	0.07
AC016205.1	ENSG00000267374.1	0.38	0.61	1.26	0.93	1.67	0.71	1.16	1.33	0.495	1.095	1.19	1.245
AC016355.1	ENSG00000270964.1	0	0	0.41	0.1	0.09	0.53	0.31	0.61	0	0.255	0.31	0.46
AC016394.1	ENSG00000272599.2	3.17	5.29	2.24	4.21	2.99	3.1	2.24	1.93	4.23	3.225	3.045	2.085
AC016397.2	ENSG00000279822.1	0.22	0.24	0	0	0	0	0	0.05	0.23	0	0	0.025
AC016405.3	ENSG00000272384.1	0	0.48	0.18	0.22	0	0	0	0.29	0.24	0.2	0	0.145
AC016542.2	ENSG00000279502.1	0	0.82	0	0.38	0	0	0.27	0	0.41	0.19	0	0.135
AC016571.1	ENSG00000251405.2	0	0	0.75	0.42	0	0	0.11	0.15	0	0.585	0	0.13
AC016582.1	ENSG00000225868.6	0.44	0.38	0	0.09	0.08	0.23	0.07	0	0.41	0.045	0.155	0.035
AC016582.2	ENSG00000267422.1	0.45	0.34	0.63	0.47	0.13	1.47	2.98	2.48	0.395	0.55	0.8	2.73
AC016582.3	ENSG00000267640.5	6.89	3.41	2.53	0.16	0.97	0.14	3.71	0.65	5.15	1.345	0.555	2.18
AC016583.1	ENSG00000280159.1	0	0	0	0	0.05	0.05	0.09	0	0	0	0.05	0.045
AC016586.1	ENSG00000268670.1	1.97	0.69	0.26	2.53	1	0.82	1.4	1.47	1.33	1.395	0.91	1.435
AC016588.1	ENSG00000267124.2	7.31	12.34	10.57	6.86	6.44	10.17	6.62	6.19	9.825	8.715	8.305	6.405
AC016588.2	ENSG00000282393.1	0	0.45	0.04	0.14	0	0.04	0.07	0.06	0.225	0.09	0.02	0.065
AC016590.1	ENSG00000267605.5	2.34	3.11	0.19	0	0.34	3.16	0.72	0.48	2.725	0.095	1.75	0.6
AC016590.2	ENSG00000267682.1	1.68	0	0	2.73	0	1.15	0	0	0.84	1.365	0.575	0
AC016590.3	ENSG00000276846.1	0	1.76	0.66	1.88	0.87	0.47	0.6	2.15	0.88	1.27	0.67	1.375
AC016629.2	ENSG00000269600.1	0	0	0	0	0	0	0.16	0.42	0	0	0	0.29
AC016705.2	ENSG00000259495.2	0.24	1.12	0.14	0.13	0.09	0.02	0.18	0.64	0.68	0.135	0.055	0.41
AC016708.1	ENSG00000229267.2	0.77	0	0	0	0.49	0	1.02	0	0.385	0	0.245	0.51
AC016722.2	ENSG00000228925.1	0.81	0.26	0.26	0.24	0.29	0.43	0.38	0.22	0.535	0.25	0.36	0.3
AC016727.1	ENSG00000270820.5	1.68	6.88	1.59	5.81	5.25	6.02	0.93	1.92	4.28	3.7	5.635	1.425
AC016734.1	ENSG00000228305.2	0.3	0	0	0.34	0	0	0	0.91	0.15	0.17	0	0.455
AC016737.1	ENSG00000271151.1	0.62	0	0	0	0	0.14	0	0.43	0.31	0	0.07	0.215
AC016738.1	ENSG00000223947.1	0.12	0.04	0	0	0	0	0.18	0.03	0.08	0	0	0.105
AC016739.1	ENSG00000218175.2	1.04	2.17	1.69	3.85	2.68	4.8	0	6.34	1.605	2.77	3.74	3.17
AC016747.1	ENSG00000212978.6	2.15	1.52	3.04	3.47	2.53	2.5	4.75	3.53	1.835	3.255	2.515	4.14
AC016747.3	ENSG00000273302.1	1.14	0.81	0.41	0.25	0.81	0	1.49	0	0.975	0.33	0.405	0.745
AC016773.1	ENSG00000270195.1	0.22	1.33	0.2	0.73	0.4	0.64	0.91	0.81	0.775	0.465	0.52	0.86
AC016825.1	ENSG00000232767.1	0.47	0.56	0	1.02	0.62	0.67	0.19	0.34	0.515	0.51	0.645	0.265
AC016831.1	ENSG00000226380.7	0.02	0.02	0	0	0	0	0	0	0.02	0	0	0
AC016876.1	ENSG00000233223.2	4.27	27.86	11.03	11.42	10.09	16.75	15.33	7.33	16.065	11.225	13.42	11.33
AC016876.2	ENSG00000264772.5	1.7	2.93	2.11	2.44	1.62	1.92	1.3	2.06	2.315	2.275	1.77	1.68
AC016876.3	ENSG00000276384.1	0	1.97	0	5.34	1.11	1.52	0	1.18	0.985	2.67	1.315	0.59
AC016888.1	ENSG00000266036.1	77.68	30.51	73.72	46.33	172.75	59.58	131.93	74.45	54.095	60.025	116.165	103.19
AC016949.1	ENSG00000230732.4	0.22	0.48	0.18	0.45	0.68	0.29	0.86	0.59	0.35	0.315	0.485	0.725
AC016954.1	ENSG00000258134.1	0.25	0	0.22	0	0.22	0	0.2	0	0.125	0.11	0.11	0.1
AC016957.2	ENSG00000276136.1	0.62	0.24	0.37	0.45	0.37	0.78	1.51	0.6	0.43	0.41	0.575	1.055
AC017007.4	ENSG00000250500.1	0.12	0.26	0	0.12	0	0	0	0	0.19	0.06	0	0
AC017074.1	ENSG00000227359.1	0	0	0	0.46	0.34	0	0	0.61	0	0.23	0.17	0.305
AC017083.1	ENSG00000273064.1	0	0.99	0.15	0	0.31	0.32	0.28	0.24	0.495	0.075	0.315	0.26
AC017083.2	ENSG00000273275.1	38.13	48.29	34.12	27.92	23.38	32.48	30.73	26.46	43.21	31.02	27.93	28.595
AC017083.3	ENSG00000273398.5	4.7	1.31	1.23	0.31	2.23	0.88	1.93	1.63	3.005	0.77	1.555	1.78
AC017100.1	ENSG00000259985.1	3.72	3.86	4.05	5.27	2.45	3.49	3.81	4.08	3.79	4.66	2.97	3.945
AC017104.1	ENSG00000224376.1	0.24	0.77	0	0.98	0	0.58	0	0.24	0.505	0.49	0.29	0.12
AC017116.1	ENSG00000239775.1	0.95	0.25	0	0	1.69	0.13	0.8	0	0.6	0	0.91	0.4
AC018362.1	ENSG00000261684.1	7.73	12.94	12.1	11	8.33	17.04	12.32	10.01	10.335	11.55	12.685	11.165
AC018362.2	ENSG00000261822.1	5.68	8.05	1.22	5.39	3.93	2.48	4.18	6.84	6.865	3.305	3.205	5.51
AC018410.2	ENSG00000256897.1	0.34	0.42	0	0	0	0	0	1.29	0.38	0	0	0.645
AC018413.1	ENSG00000265778.2	0	0.75	0	0.14	0	0	0.11	0.37	0.375	0.07	0	0.24
AC018445.3	ENSG00000279637.1	0.08	0.33	0.25	0	0	0.13	0.29	0.05	0.205	0.125	0.065	0.17
AC018463.1	ENSG00000230154.1	0	0.22	0.16	0	0	0	0	0.11	0.11	0.08	0	0.055
AC018470.1	ENSG00000280414.1	0	0	0.14	0.18	0.16	0	0.07	0.15	0	0.16	0.08	0.11
AC018512.1	ENSG00000262560.1	0.12	0.17	0	0	0	0.12	0	0	0.145	0	0.06	0
AC018521.2	ENSG00000264019.1	3.66	3.95	3.93	2.24	6.49	1.73	5.51	1.48	3.805	3.085	4.11	3.495
AC018521.4	ENSG00000264701.1	0	0.56	0.43	0	0	0.44	0	0	0.28	0.215	0.22	0
AC018521.5	ENSG00000264920.1	0.47	6.89	5.04	4.28	6.66	3.72	2.21	5.61	3.68	4.66	5.19	3.91
AC018529.2	ENSG00000278330.1	0	0.05	0	0	0.16	0	0	0	0.025	0	0.08	0
AC018553.1	ENSG00000277559.1	0	0.12	0.09	0	0.28	0	0	0.07	0.06	0.045	0.14	0.035
AC018557.1	ENSG00000260465.1	11.32	17.59	15.66	17.9	13.19	15.48	11.34	15.44	14.455	16.78	14.335	13.39
AC018628.1	ENSG00000279133.1	0.36	0.31	0.35	0.46	0.26	0.25	0.67	0.4	0.335	0.405	0.255	0.535
AC018630.2	ENSG00000275778.1	0	0	0.19	0.45	0.31	0.87	0.29	0.25	0	0.32	0.59	0.27
AC018635.1	ENSG00000242261.1	9.36	4.77	1.93	2.03	1.72	2.81	3.47	2.59	7.065	1.98	2.265	3.03
AC018638.1	ENSG00000229413.2	24.73	5.39	31.54	0	13.08	1.96	14.35	6.25	15.06	15.77	7.52	10.3
AC018638.2	ENSG00000230715.3	4.99	1.17	3.61	12.69	6.83	3.59	5.42	11.88	3.08	8.15	5.21	8.65
AC018638.4	ENSG00000243302.3	5.79	2.58	7.32	6.84	7.21	4.69	9.72	6.07	4.185	7.08	5.95	7.895
AC018638.5	ENSG00000243679.1	9.79	5.56	11	6.44	13.45	4.68	12.4	8.94	7.675	8.72	9.065	10.67
AC018638.6	ENSG00000271344.1	0	0	0.31	0.13	0.11	0.11	0.39	0.17	0	0.22	0.11	0.28
AC018638.7	ENSG00000271553.1	0.44	0	0.49	0.3	0.26	0.13	0.35	0.4	0.22	0.395	0.195	0.375
AC018641.1	ENSG00000226468.2	0.68	0.27	0	0	0	0	0	0.33	0.475	0	0	0.165
AC018645.2	ENSG00000273014.1	4.67	3.7	5.64	0.67	1.36	0.58	2.31	1.34	4.185	3.155	0.97	1.825
AC018647.2	ENSG00000271122.1	1.08	1.08	1.71	1.22	1.02	1.53	1.21	2.21	1.08	1.465	1.275	1.71
AC018653.3	ENSG00000256967.1	1.01	0.59	1.8	1.65	1.1	0.49	4.14	2.42	0.8	1.725	0.795	3.28
AC018659.2	ENSG00000279798.1	0.53	0.64	0	0	0	0	0	0	0.585	0	0	0
AC018665.1	ENSG00000279382.1	5.95	4.44	9.39	4.68	6.52	3.58	8.99	3.74	5.195	7.035	5.05	6.365
AC018682.1	ENSG00000250116.2	0.1	0	0	0	0.18	0.09	0.16	0.07	0.05	0	0.135	0.115
AC018690.1	ENSG00000273306.1	0.32	0	0.3	0.37	0.85	0	0	0.49	0.16	0.335	0.425	0.245
AC018695.4	ENSG00000270184.1	1.67	0.34	1.28	0.31	0.74	1.63	0.69	0	1.005	0.795	1.185	0.345
AC018755.1	ENSG00000267808.1	0	0	0	0	0	0	0.32	0.09	0	0	0	0.205
AC018755.3	ENSG00000269388.1	0.29	1.45	2.73	3.32	1.3	5.2	0.73	3.98	0.87	3.025	3.25	2.355
AC018761.2	ENSG00000267062.1	10.06	34.9	15.67	60.58	26.75	56.07	0	5.7	22.48	38.125	41.41	2.85
AC018766.1	ENSG00000268047.1	0	0	0	0	0.43	0	0.44	0.84	0	0	0.215	0.64
AC018797.2	ENSG00000246560.2	0	1.6	0.52	0.63	0.7	0.74	0.32	0.7	0.8	0.575	0.72	0.51
AC018797.3	ENSG00000251288.2	0.26	0	1.28	1.98	0.8	0.81	1.01	0.97	0.13	1.63	0.805	0.99
AC018809.1	ENSG00000269894.1	0.39	0	1.17	0.47	0.35	0.81	1.01	0.62	0.195	0.82	0.58	0.815
AC018809.2	ENSG00000269982.1	0.44	0.15	0.46	0.36	0.42	0.16	0.47	0.26	0.295	0.41	0.29	0.365
AC018845.3	ENSG00000261173.1	0.44	0	0.45	0	0	0	0	0.36	0.22	0.225	0	0.18
AC018892.3	ENSG00000279791.1	0	0	0	0.06	0	0	0.04	0.04	0	0.03	0	0.04
AC018904.1	ENSG00000259250.1	0	1.61	0.41	0.49	0	0	1.05	0	0.805	0.45	0	0.525
AC019069.1	ENSG00000272711.1	6.11	11.73	1.56	4.92	2.61	4	1.66	3.76	8.92	3.24	3.305	2.71
AC019080.1	ENSG00000213963.6	0	0	0.79	0.03	0.09	0.09	0.09	0.39	0	0.41	0.09	0.24
AC019080.5	ENSG00000280374.1	0	0	0.22	0.27	0.22	0	0	0.36	0	0.245	0.11	0.18
AC019097.1	ENSG00000231822.1	1.78	0.27	0.23	0.56	0.9	0.49	0.62	0	1.025	0.395	0.695	0.31
AC019129.2	ENSG00000273106.1	0	0.14	0	0.13	0	0	0.1	0.26	0.07	0.065	0	0.18
AC019131.2	ENSG00000272777.1	0.6	0.7	0.35	0	0.18	0	0.65	0.14	0.65	0.175	0.09	0.395
AC019155.1	ENSG00000205898.3	0	0.48	0.36	0	0	0	0	0	0.24	0.18	0	0
AC019163.1	ENSG00000248980.1	0.67	0.42	0.32	1.94	2.37	0	0.28	0.26	0.545	1.13	1.185	0.27
AC019171.1	ENSG00000269210.2	0.16	0.18	0.53	0.49	0.28	0.57	1.62	0.22	0.17	0.51	0.425	0.92
AC019193.2	ENSG00000272784.1	0	0	1.19	0	0	0.94	0.53	0	0	0.595	0.47	0.265
AC019205.1	ENSG00000229852.2	2.04	2.43	1.57	1.1	1.76	0.76	1.69	1.21	2.235	1.335	1.26	1.45
AC019322.4	ENSG00000279417.1	0	0	0	0	0.13	0.06	0.04	0	0	0	0.095	0.02
AC020558.2	ENSG00000265511.1	0.23	0	0	0	0.2	0	0	0	0.115	0	0.1	0
AC020612.1	ENSG00000257243.1	0.81	0	0.82	0	0	0	0.7	0.33	0.405	0.41	0	0.515
AC020612.3	ENSG00000257964.1	0.37	0.48	1.83	0	0.66	0.38	0.95	0.88	0.425	0.915	0.52	0.915
AC020633.1	ENSG00000240890.2	0.06	0	0	0	0	0.11	0.1	0	0.03	0	0.055	0.05
AC020656.2	ENSG00000274979.1	0	0.03	0.04	0	0	0	0	0.05	0.015	0.02	0	0.025
AC020658.3	ENSG00000260648.3	0.14	0.07	0	0	0.06	0	0.05	0	0.105	0	0.03	0.025
AC020658.4	ENSG00000273786.1	0	0.34	0	0	0.25	0	0.47	0	0.17	0	0.125	0.235
AC020658.6	ENSG00000279409.1	0	0	0.06	0.08	0.07	0.07	0	0	0	0.07	0.07	0
AC020659.2	ENSG00000250379.1	0	0.46	0.92	1.1	0	0.48	1.55	1.1	0.23	1.01	0.24	1.325
AC020661.1	ENSG00000251161.3	0.48	0.11	0.94	0.58	0.68	1.1	0.67	0.65	0.295	0.76	0.89	0.66
AC020663.3	ENSG00000275056.1	0.75	0	0.38	0.16	0.27	0.14	0.48	0	0.375	0.27	0.205	0.24
AC020688.1	ENSG00000224722.3	0.13	0.14	0	0	0.11	0	0	0.17	0.135	0	0.055	0.085
AC020763.2	ENSG00000279122.1	0.13	0.14	0	0.13	0	0	0.1	0.26	0.135	0.065	0	0.18
AC020763.3	ENSG00000279412.1	1.02	0.16	0.58	0.53	0.52	0.21	0.6	0.38	0.59	0.555	0.365	0.49
AC020763.4	ENSG00000279569.1	10.02	7.01	27.35	22.58	24.55	21.84	25.03	18.86	8.515	24.965	23.195	21.945
AC020904.2	ENSG00000273654.1	0	0.12	0	0.34	0.2	0.1	0.14	0	0.06	0.17	0.15	0.07
AC020907.1	ENSG00000179066.7	0.12	0.97	0	0	0.11	0.11	0	0	0.545	0	0.11	0
AC020907.4	ENSG00000271032.1	2.14	1.15	1.3	1.05	0.38	1.35	0	0.69	1.645	1.175	0.865	0.345
AC020907.5	ENSG00000279619.1	0.3	0.41	0	0	0.07	0	0	0	0.355	0	0.035	0
AC020908.3	ENSG00000269066.1	0	0	0	0	0	0.34	0.56	0	0	0	0.17	0.28
AC020909.2	ENSG00000268518.1	0	0	8.22	4.8	3.41	7.38	2.96	2.21	0	6.51	5.395	2.585
AC020909.3	ENSG00000268854.1	18.49	36.53	11.77	47.69	27.66	30.97	13.34	36.87	27.51	29.73	29.315	25.105
AC020910.3	ENSG00000271049.1	0.6	0.23	0.17	0	0	0	0	0.14	0.415	0.085	0	0.07
AC020910.4	ENSG00000274104.1	0	1.08	0	0	0.36	1.71	0	0.33	0.54	0	1.035	0.165
AC020910.5	ENSG00000279329.1	0.08	0.69	0.65	0.56	0.42	1.05	0.68	1.17	0.385	0.605	0.735	0.925
AC020915.1	ENSG00000267216.1	1.54	1.21	0.49	1.07	0.73	0.69	0.58	1.03	1.375	0.78	0.71	0.805
AC020915.2	ENSG00000268201.1	2.77	0.52	0.39	0.48	0.7	0.41	1.36	0.95	1.645	0.435	0.555	1.155
AC020915.3	ENSG00000268516.2	3.68	3.09	2.9	2.39	2.11	2.05	3.93	1.59	3.385	2.645	2.08	2.76
AC020915.4	ENSG00000268866.1	0.18	0.4	0	0	0	0.16	0	0	0.29	0	0.08	0
AC020916.1	ENSG00000267519.3	0	0.09	0.62	0.76	0.67	0.67	0.79	1.47	0.045	0.69	0.67	1.13
AC020917.1	ENSG00000240418.1	0	0	0	0.21	0	0.36	0.78	0	0	0.105	0.18	0.39
AC020917.4	ENSG00000280332.1	1.4	0.4	0.65	0.37	0.59	0.39	1.08	0.93	0.9	0.51	0.49	1.005
AC020922.1	ENSG00000267706.3	0.12	0.05	0	0	0	0	0	0	0.085	0	0	0
AC020922.2	ENSG00000268729.1	0	0	0	0	1.62	1.36	0	0	0	0	1.49	0
AC020922.3	ENSG00000269275.1	0	0	0.8	0.96	0	0	0	0.32	0	0.88	0	0.16
AC020928.1	ENSG00000267260.1	8.81	6.45	2.28	3.02	2.46	1.34	2.45	2.36	7.63	2.65	1.9	2.405
AC020928.2	ENSG00000267353.1	1.52	1.07	0.75	0.13	1.06	0.29	0.61	0.48	1.295	0.44	0.675	0.545
AC020934.1	ENSG00000267424.1	3.53	1.81	1.36	0.55	0.45	0	0	0.55	2.67	0.955	0.225	0.275
AC020951.1	ENSG00000278897.1	0.06	0.07	0.21	0.06	0.06	0.45	0.25	0.13	0.065	0.135	0.255	0.19
AC020978.4	ENSG00000261469.1	0.42	0	0	1.52	1.1	0	0.72	2.02	0.21	0.76	0.55	1.37
AC020978.5	ENSG00000262160.1	12.28	11.03	8.97	10.1	9.38	8.68	12.45	8.88	11.655	9.535	9.03	10.665
AC020978.6	ENSG00000262514.1	0	0	0	0.42	0.24	0	0.11	0.09	0	0.21	0.12	0.1
AC020978.7	ENSG00000263276.1	0.64	0.78	1.62	1.17	0.86	1.63	1.55	1.23	0.71	1.395	1.245	1.39
AC020978.8	ENSG00000279621.1	0	0.16	0	0.15	0.5	0.13	0	0	0.08	0.075	0.315	0
AC020978.9	ENSG00000279649.1	0.26	0.34	0.17	0.16	0.33	0.09	0.24	0.21	0.3	0.165	0.21	0.225
AC021016.2	ENSG00000261338.2	0.5	0.23	0.17	0.21	0.06	0.06	0.17	0.14	0.365	0.19	0.06	0.155
AC021016.3	ENSG00000273361.1	0	0	0.55	1.97	0.45	1.13	0	0.43	0	1.26	0.79	0.215
AC021054.1	ENSG00000177406.4	0.48	0.5	1.39	1.12	0.53	0.98	0.87	1.64	0.49	1.255	0.755	1.255
AC021078.1	ENSG00000230551.4	5.75	3	5.28	4.01	5.06	4.03	5.82	4.21	4.375	4.645	4.545	5.015
AC021086.1	ENSG00000247877.6	1.07	0	0.32	0.1	0	0	0	0.07	0.535	0.21	0	0.035
AC021087.2	ENSG00000250848.1	0.8	0.45	0.11	0.41	0.59	0	0.21	0	0.625	0.26	0.295	0.105
AC021087.3	ENSG00000260774.1	0.34	0.74	0.39	0.29	0.39	0.21	0.42	0.16	0.54	0.34	0.3	0.29
AC021087.4	ENSG00000261434.1	0.38	0	0	0.45	0	0.78	0	0.6	0.19	0.225	0.39	0.3
AC021092.1	ENSG00000186019.10	3.55	3.98	3.25	4.19	2.82	3.04	3.41	4.26	3.765	3.72	2.93	3.835
AC021097.1	ENSG00000272661.1	1.11	0.95	2.16	2.61	2.93	0.38	0	0.58	1.03	2.385	1.655	0.29
AC021106.1	ENSG00000249863.2	0.78	0.35	0.66	0.33	0.42	0.14	2.23	0.43	0.565	0.495	0.28	1.33
AC021106.2	ENSG00000251332.1	0	0	0.73	0	0.47	0	0.44	0.2	0	0.365	0.235	0.32
AC021106.3	ENSG00000279386.1	1.26	0	0.85	0.51	0.37	0.88	0.73	1.02	0.63	0.68	0.625	0.875
AC021146.12	ENSG00000272626.1	0	0	0.55	0	0	1.13	0	0.43	0	0.275	0.565	0.215
AC021146.2	ENSG00000248547.2	0	0	0	0.46	1.03	0	1	0	0	0.23	0.515	0.5
AC021148.1	ENSG00000224097.5	0	0.39	0	0	0.15	0	0.17	0	0.195	0	0.075	0.085
AC021205.1	ENSG00000240775.1	0	0	0	0	0.87	0	0	1.22	0	0	0.435	0.61
AC021205.3	ENSG00000273007.1	0	0.29	0	0.09	0.16	0	0.27	0.06	0.145	0.045	0.08	0.165
AC021224.1	ENSG00000262477.1	5.34	6.47	5.39	8.15	5.83	4.8	5.3	4.69	5.905	6.77	5.315	4.995
AC021231.2	ENSG00000259397.3	0.26	0	0.23	0	0	0	0	0.19	0.13	0.115	0	0.095
AC021242.3	ENSG00000272267.2	10.39	4.38	8.33	9.45	7.84	8.28	11.8	8.07	7.385	8.89	8.06	9.935
AC021321.1	ENSG00000271966.1	0.59	0.83	0.74	1.06	0.26	1.2	0.58	0.3	0.71	0.9	0.73	0.44
AC021483.2	ENSG00000261229.5	0.16	0.29	0.07	0	0.07	0.07	0.06	0.32	0.225	0.035	0.07	0.19
AC021491.2	ENSG00000250286.1	0.68	0	0.24	0	0	0	0	0	0.34	0.12	0	0
AC021683.1	ENSG00000267466.1	0.42	0.18	0.07	0	0.08	0.3	0.59	0.28	0.3	0.035	0.19	0.435
AC021683.2	ENSG00000267506.5	0.06	0.03	0.13	0	0	0.12	0.15	0.23	0.045	0.065	0.06	0.19
AC021739.2	ENSG00000259407.1	0.53	0	0	0.19	0	0.49	0	0.86	0.265	0.095	0.245	0.43
AC021752.1	ENSG00000273674.4	0	0	0.19	0.18	0	0	0.05	0.08	0	0.185	0	0.065
AC021851.1	ENSG00000272800.1	0.3	0.51	0	0	0.13	0.14	0	0.11	0.405	0	0.135	0.055
AC021876.1	ENSG00000232627.1	0	0	0	0	0	0	0.96	0	0	0	0	0.48
AC021945.1	ENSG00000279347.1	2.56	1.3	0.67	0.09	0.73	0.4	1.57	0.61	1.93	0.38	0.565	1.09
AC022007.1	ENSG00000206567.9	1.65	0.43	0.32	0.49	0.09	0.27	0.23	0.65	1.04	0.405	0.18	0.44
AC022031.2	ENSG00000267284.1	1.28	0	0	0.47	0.34	0	0	0.91	0.64	0.235	0.17	0.455
AC022034.1	ENSG00000237807.3	0	0	0.63	0.24	0.38	0.68	0.42	0.32	0	0.435	0.53	0.37
AC022034.3	ENSG00000254204.1	0	0	1.15	0	0	0	0	0.45	0	0.575	0	0.225
AC022075.1	ENSG00000245648.1	0	0	0.16	0	0	0	0.15	0.07	0	0.08	0	0.11
AC022075.2	ENSG00000256288.1	0.61	0.38	0	0	0	0	0	0	0.495	0	0	0
AC022087.1	ENSG00000259715.1	0	0	0	0	0.88	0	0.28	0	0	0	0.44	0.14
AC022098.1	ENSG00000267169.1	8.19	7.76	2.78	2.65	3.1	1.2	3.07	1.28	7.975	2.715	2.15	2.175
AC022107.1	ENSG00000280187.1	0.27	0.24	0.51	0.54	0.77	0.87	1.05	0.93	0.255	0.525	0.82	0.99
AC022137.2	ENSG00000249435.1	0	0.71	0	1.93	0	0	0.89	0	0.355	0.965	0	0.445
AC022140.1	ENSG00000248605.5	6.39	15.97	0.59	1.52	1.11	3.39	0.52	2.14	11.18	1.055	2.25	1.33
AC022144.1	ENSG00000267892.1	0.1	0.74	0	0.29	0.09	0	0.15	0	0.42	0.145	0.045	0.075
AC022148.1	ENSG00000180458.2	0.09	0	0.07	0	0.15	0.04	0.1	0.03	0.045	0.035	0.095	0.065
AC022148.2	ENSG00000267115.1	0	0	0	0	0	0	0.33	0	0	0	0	0.165
AC022149.1	ENSG00000269378.1	8.21	10.07	34.34	38.61	30.88	47.73	29.01	27.02	9.14	36.475	39.305	28.015
AC022150.1	ENSG00000268886.1	2.18	0.77	1.46	2.13	1.38	0.62	0.52	0.94	1.475	1.795	1	0.73
AC022150.2	ENSG00000268970.1	0.62	1.91	0.58	0.35	2.73	2.13	3.08	1.17	1.265	0.465	2.43	2.125
AC022150.3	ENSG00000269349.1	0.59	0.46	1.04	0.63	0.88	0.18	0.64	0.42	0.525	0.835	0.53	0.53
AC022150.4	ENSG00000269825.1	1.34	1.22	11.04	12.62	9.31	14.49	10.93	7.53	1.28	11.83	11.9	9.23
AC022154.1	ENSG00000268093.1	0.24	0.29	0.21	0	0.21	0	0	0	0.265	0.105	0.105	0
AC022165.1	ENSG00000261243.1	0.35	0	0	0.41	0	0	0	0.81	0.175	0.205	0	0.405
AC022167.1	ENSG00000259939.1	26.93	15.65	8.59	5.04	7.22	11.99	17.57	4	21.29	6.815	9.605	10.785
AC022167.2	ENSG00000260276.2	3.61	3.48	4.58	0.3	4.05	1.52	2.58	2.19	3.545	2.44	2.785	2.385
AC022210.1	ENSG00000213399.3	0.68	0	0.81	0.25	0.2	0.22	0	0	0.34	0.53	0.21	0
AC022211.1	ENSG00000263786.1	3.16	0.32	1.2	1.17	1.4	0.25	1.51	0.19	1.74	1.185	0.825	0.85
AC022211.2	ENSG00000263843.1	2.15	3.71	1.32	1.07	1.41	0.94	0.48	1.95	2.93	1.195	1.175	1.215
AC022211.3	ENSG00000265800.1	2.17	0	0	0	0	3.68	0	0	1.085	0	1.84	0
AC022211.4	ENSG00000279035.1	1.35	2.18	1.19	2.15	2.16	1.83	1.25	3.31	1.765	1.67	1.995	2.28
AC022274.1	ENSG00000253712.1	0	0	0.51	0	0.43	0.53	0	0	0	0.255	0.48	0
AC022306.1	ENSG00000259531.2	0.1	0.21	0	0	0.09	0.09	0	0	0.155	0	0.09	0
AC022336.3	ENSG00000280042.1	0.45	0.08	0.42	0.3	0.33	0.26	0.63	0.2	0.265	0.36	0.295	0.415
AC022364.1	ENSG00000247934.4	0.48	0.06	0.45	0	0.53	0.23	0.37	0.47	0.27	0.225	0.38	0.42
AC022384.1	ENSG00000272410.5	2.02	3.38	1.78	1	0.85	1.12	3.03	1.02	2.7	1.39	0.985	2.025
AC022395.1	ENSG00000231104.8	0.7	0	0.21	0.93	0	0.66	0.94	0	0.35	0.57	0.33	0.47
AC022400.2	ENSG00000229990.3	0.2	0	0	0	0.36	0	0	0.14	0.1	0	0.18	0.07
AC022400.5	ENSG00000272140.2	1.45	1.74	1.48	0.8	1.85	1.12	1.41	1.2	1.595	1.14	1.485	1.305
AC022400.6	ENSG00000272916.5	1.74	1.36	3.12	3.29	3.04	2.62	3.34	2.9	1.55	3.205	2.83	3.12
AC022400.7	ENSG00000279088.1	0.9	3.59	2.04	2.65	2.29	2.67	0.71	3.53	2.245	2.345	2.48	2.12
AC022400.8	ENSG00000279689.1	11.02	10.81	16.91	16.25	16.76	17.15	16.2	17.3	10.915	16.58	16.955	16.75
AC022413.1	ENSG00000280161.1	0	0.59	1.03	1.62	0.46	1.73	0.27	1.56	0.295	1.325	1.095	0.915
AC022415.1	ENSG00000242615.1	7.71	7.22	4.75	5.31	3.95	4.65	10.49	6.84	7.465	5.03	4.3	8.665
AC022417.1	ENSG00000279923.1	0	0.13	0	0	0.21	0	0.19	0	0.065	0	0.105	0.095
AC022424.1	ENSG00000250579.1	2.54	1.36	0.34	0.83	1.04	0.36	0.79	0.42	1.95	0.585	0.7	0.605
AC022497.1	ENSG00000280399.1	0.08	0.04	0.15	0.04	0.2	0.1	0.23	0	0.06	0.095	0.15	0.115
AC022509.1	ENSG00000255750.5	0	0	0	0	0	0	0.66	0.2	0	0	0	0.43
AC022532.1	ENSG00000280401.1	1.04	0.57	0.64	0.26	0.15	0	0.41	0.12	0.805	0.45	0.075	0.265
AC022613.1	ENSG00000256802.2	0.62	0.61	0.09	0.06	0.3	0.05	0.31	0.41	0.615	0.075	0.175	0.36
AC022613.2	ENSG00000259523.1	0	0	0.09	0.11	0.09	0	0.17	0	0	0.1	0.045	0.085
AC022613.3	ENSG00000259644.1	0.23	0.26	0.19	0.24	0.1	0.21	0.27	0	0.245	0.215	0.155	0.135
AC022706.1	ENSG00000267364.1	0	0	0	0.69	0	0	1.42	0	0	0.345	0	0.71
AC022730.4	ENSG00000253967.1	0.06	0.07	0	0	0.22	0	0	0	0.065	0	0.11	0
AC022762.2	ENSG00000267940.1	0.35	0.13	0.1	0	0.1	0.1	0.36	0.39	0.24	0.05	0.1	0.375
AC022784.5	ENSG00000254340.1	0.61	0	0.57	0.69	0.27	0.3	0.25	0.23	0.305	0.63	0.285	0.24
AC022819.1	ENSG00000259921.1	0	0	0	0.14	0.09	0	0.11	0.02	0	0.07	0.045	0.065
AC022826.2	ENSG00000258677.2	4.08	0	3.15	2.02	2.1	0	1.87	1.49	2.04	2.585	1.05	1.68
AC022893.1	ENSG00000253636.1	4.2	3.59	0.12	1	0.52	0.24	1.18	0.36	3.895	0.56	0.38	0.77
AC022893.2	ENSG00000260838.3	0	0	0.03	0.08	0.04	0	0.16	0.06	0	0.055	0.02	0.11
AC022893.3	ENSG00000272254.1	1.2	2.74	0	0	0	1.41	0	0	1.97	0	0.705	0
AC022898.2	ENSG00000273792.1	0	0	0	0.12	0.11	0	0	0	0	0.06	0.055	0
AC022916.1	ENSG00000266947.1	0.16	0.06	0.6	0.48	0.24	0.47	0.66	0.64	0.11	0.54	0.355	0.65
AC022919.1	ENSG00000279250.1	0	0	0	0.37	0	0	0.81	0.25	0	0.185	0	0.53
AC022960.2	ENSG00000276282.1	0	0	0	0	0.52	0.29	0	0	0	0	0.405	0
AC022966.1	ENSG00000267601.1	19.49	24.88	38.55	72.59	86.53	85.81	55.29	66.43	22.185	55.57	86.17	60.86
AC022968.1	ENSG00000260747.1	4.71	3.53	2.03	1.6	0	4.79	1.07	1.59	4.12	1.815	2.395	1.33
AC022973.4	ENSG00000254317.1	0.19	0	0	0	0	0	0	0.13	0.095	0	0	0.065
AC023024.1	ENSG00000259172.1	0.44	0.24	2.16	1.91	1.23	1.92	1.58	1.2	0.34	2.035	1.575	1.39
AC023024.2	ENSG00000279970.1	0.15	0.34	0.38	0.47	0.48	0.37	0.33	0.4	0.245	0.425	0.425	0.365
AC023043.1	ENSG00000260552.1	3.7	1.7	0.32	0	0.89	0.34	1.13	0.26	2.7	0.16	0.615	0.695
AC023055.1	ENSG00000257390.5	0	1.01	0	0	0	0.54	0.2	0.34	0.505	0	0.27	0.27
AC023090.2	ENSG00000279077.1	0	0.37	0	0.07	0	0.06	0.21	0.14	0.185	0.035	0.03	0.175
AC023157.3	ENSG00000276900.1	0	0.15	0.06	0.14	0.31	0.43	0.11	0.09	0.075	0.1	0.37	0.1
AC023158.1	ENSG00000259937.2	0.49	0	0	0.17	0	0.15	0	0	0.245	0.085	0.075	0
AC023271.1	ENSG00000228513.1	0	0	0	0.16	0	0	0.24	0	0	0.08	0	0.12
AC023300.2	ENSG00000277749.1	1	1.26	0	0.77	0	0	0	0	1.13	0.385	0	0
AC023301.1	ENSG00000265579.1	0.59	0.78	0	0.13	0	0	0.15	0.26	0.685	0.065	0	0.205
AC023355.1	ENSG00000259488.2	1.78	1.51	0.62	1.11	1.07	0.75	1.05	1.26	1.645	0.865	0.91	1.155
AC023389.2	ENSG00000265713.1	0	0	0	0	0	0	0.43	0.13	0	0	0	0.28
AC023449.2	ENSG00000274307.1	0.12	0.06	0.1	0	0	0	0.09	0	0.09	0.05	0	0.045
AC023490.2	ENSG00000277690.2	0	0	3.42	0.68	0.92	0.58	0.47	0.45	0	2.05	0.75	0.46
AC023491.1	ENSG00000278066.1	0.18	0	0.16	0.2	0	0	0	0.13	0.09	0.18	0	0.065
AC023509.1	ENSG00000257379.1	3.98	1.1	7.75	5.87	10.31	2.37	3.86	1.87	2.54	6.81	6.34	2.865
AC023509.2	ENSG00000257550.1	4.65	2.17	4.76	3.75	4.65	2.91	4.43	4.25	3.41	4.255	3.78	4.34
AC023509.3	ENSG00000267281.2	0.88	1.39	0.56	1.91	0.3	0.32	2.22	0.85	1.135	1.235	0.31	1.535
AC023509.4	ENSG00000270175.1	0.24	1.12	0	1.03	0	0.45	0.19	0.68	0.68	0.515	0.225	0.435
AC023632.2	ENSG00000253704.1	0.08	0.27	0	0.08	0.07	0	0	0.17	0.175	0.04	0.035	0.085
AC023632.6	ENSG00000280123.1	2.27	2.59	2.1	3.06	1.19	2.04	1.97	2.62	2.43	2.58	1.615	2.295
AC023790.2	ENSG00000255621.1	0	0	0.05	0.24	0	0	0	0.04	0	0.145	0	0.02
AC023794.5	ENSG00000260470.1	0.07	0	0	0.13	0	0	0.05	0	0.035	0.065	0	0.025
AC023818.1	ENSG00000280067.1	0.31	0.34	0.5	0.12	0.45	0.27	0.44	0.17	0.325	0.31	0.36	0.305
AC023830.1	ENSG00000261442.1	0	0	0.08	0	0.35	0	0	0.47	0	0.04	0.175	0.235
AC023830.3	ENSG00000278434.1	0.63	0.47	0.17	0.11	0.09	0	0.08	0	0.55	0.14	0.045	0.04
AC023906.3	ENSG00000259327.1	5	4.18	0.87	1.71	1.95	0.93	0.64	2.56	4.59	1.29	1.44	1.6
AC023906.4	ENSG00000259709.1	0.65	0.7	0.55	0	0.19	0	0.53	0.29	0.675	0.275	0.095	0.41
AC023908.3	ENSG00000261136.1	0.18	0.25	0.18	0.23	0.04	0.2	0	0.15	0.215	0.205	0.12	0.075
AC023946.1	ENSG00000255351.1	0.7	0.89	0	0	0.62	0	0	0.81	0.795	0	0.31	0.405
AC024060.1	ENSG00000271870.1	2.86	1.98	0.5	3.01	3.35	2.59	0.84	1.2	2.42	1.755	2.97	1.02
AC024075.1	ENSG00000267904.1	2.81	0.53	0.8	0.48	2.47	0.83	2.41	0.64	1.67	0.64	1.65	1.525
AC024075.2	ENSG00000269044.2	7.3	3.33	1.98	1.27	2.78	1.76	3.1	1.98	5.315	1.625	2.27	2.54
AC024075.3	ENSG00000269427.1	3.01	3.65	1.4	4.13	0.53	9.64	2.75	6.57	3.33	2.765	5.085	4.66
AC024267.3	ENSG00000264304.1	1.91	0	0.38	0.45	0	0	0.33	0.91	0.955	0.415	0	0.62
AC024267.4	ENSG00000265845.2	0	0	0	0	0	0.28	0.47	0	0	0	0.14	0.235
AC024267.5	ENSG00000265908.1	0	0.44	0.99	0.4	0.61	0	0	0.8	0.22	0.695	0.305	0.4
AC024267.6	ENSG00000266642.2	14.36	16.88	4.88	4.92	3.47	3.5	4.7	6.87	15.62	4.9	3.485	5.785
AC024293.1	ENSG00000244313.3	12.22	18.18	12.33	17.14	14.05	11.2	9.48	11.38	15.2	14.735	12.625	10.43
AC024451.2	ENSG00000253330.1	0.29	0.17	0	0	0.13	0.13	0.12	0.31	0.23	0	0.13	0.215
AC024560.2	ENSG00000249626.1	0.8	0	0.59	0.89	0.6	0.55	0.49	0.48	0.4	0.74	0.575	0.485
AC024560.3	ENSG00000273308.1	6.04	0	0	3.66	6.93	0	9.51	0	3.02	1.83	3.465	4.755
AC024575.1	ENSG00000267277.1	3.4	1.73	0.26	1.27	2	0.83	0.94	0.63	2.565	0.765	1.415	0.785
AC024580.1	ENSG00000279794.1	0.58	0.71	0.8	0.97	0.76	0.84	2.14	0.65	0.645	0.885	0.8	1.395
AC024592.3	ENSG00000267740.5	1.31	5.61	3.33	2.9	0.38	0.72	2.22	3.2	3.46	3.115	0.55	2.71
AC024896.1	ENSG00000247903.1	2.36	4.46	1.62	1.45	1.35	1.86	1.56	1.96	3.41	1.535	1.605	1.76
AC024909.2	ENSG00000274021.1	16.03	15.63	34.72	27.89	25.55	26.11	28.46	32.38	15.83	31.305	25.83	30.42
AC024940.1	ENSG00000177359.17	0	0.18	0.41	0.54	0.14	0.92	0.02	1.42	0.09	0.475	0.53	0.72
AC024940.5	ENSG00000275097.1	0	4.16	0	1.85	0	0.72	1.05	2.21	2.08	0.925	0.36	1.63
AC025031.4	ENSG00000275481.1	0.39	0.32	0.07	0.21	0.27	0	0.23	0.2	0.355	0.14	0.135	0.215
AC025031.5	ENSG00000278896.1	0.06	0.06	0.09	0	0.05	0	0	0	0.06	0.045	0.025	0
AC025034.1	ENSG00000258302.2	0	0	1.36	0.26	0.47	0.08	1.09	0.71	0	0.81	0.275	0.9
AC025048.2	ENSG00000267248.1	0.88	0.46	0.83	0.51	0.78	0.52	0.52	1.01	0.67	0.67	0.65	0.765
AC025048.6	ENSG00000280852.1	1.51	2.13	0.54	1.29	2.21	0.55	0	0.86	1.82	0.915	1.38	0.43
AC025162.1	ENSG00000258554.1	12.13	5.91	20.85	19.34	39.43	31.93	24.51	25.71	9.02	20.095	35.68	25.11
AC025162.2	ENSG00000273973.1	0	0	1.9	0	0	0.4	0.66	0.3	0	0.95	0.2	0.48
AC025164.1	ENSG00000245904.3	0.31	0.51	0.63	0.96	2.1	0.75	0.72	0.89	0.41	0.795	1.425	0.805
AC025165.1	ENSG00000224713.4	0	0.65	0.54	0.3	0.41	0.11	0.41	0.13	0.325	0.42	0.26	0.27
AC025165.2	ENSG00000257342.1	13.65	17.57	30.71	17.04	36.24	29.65	29.68	28.34	15.61	23.875	32.945	29.01
AC025165.3	ENSG00000257921.5	5.05	0	0	0	2.32	1.95	0	0	2.525	0	2.135	0
AC025165.4	ENSG00000269903.1	0.61	0	0	0	0	0.72	0	1.69	0.305	0	0.36	0.845
AC025165.5	ENSG00000270039.1	1.1	1.41	2.13	0.43	0.97	0	0	0.29	1.255	1.28	0.485	0.145
AC025171.1	ENSG00000177738.3	0.65	0	0.72	1.14	0.28	1.71	0.44	0.77	0.325	0.93	0.995	0.605
AC025171.2	ENSG00000215068.7	0	0	0.06	0.15	0	0.13	0.11	0	0	0.105	0.065	0.055
AC025171.5	ENSG00000272382.1	0	0	0	0	0	0	0.15	0.13	0	0	0	0.14
AC025175.1	ENSG00000272416.1	0	0	0.65	0	0.86	1.16	0.59	0.18	0	0.325	1.01	0.385
AC025178.1	ENSG00000250764.1	0.64	0.25	0	0	0	0.4	0	0	0.445	0	0.2	0
AC025181.2	ENSG00000272086.1	5.62	8.48	3.19	2.92	1.79	3.61	1.46	4.22	7.05	3.055	2.7	2.84
AC025257.1	ENSG00000257386.1	39.5	36.53	47.09	32.7	53.14	40.15	48.34	41.36	38.015	39.895	46.645	44.85
AC025259.1	ENSG00000257663.1	16.84	35.69	24.05	22.27	16.51	24.79	18.35	21.99	26.265	23.16	20.65	20.17
AC025259.3	ENSG00000259884.1	2.03	5.46	1.07	3.25	0.85	0.85	2.31	1.49	3.745	2.16	0.85	1.9
AC025262.3	ENSG00000280320.1	37.18	35.94	44.6	46.44	27.27	29.5	55.08	40.11	36.56	45.52	28.385	47.595
AC025265.1	ENSG00000257681.1	0.5	2.47	0.46	0.28	0	0	0	0.19	1.485	0.37	0	0.095
AC025268.1	ENSG00000281974.1	0	0.3	0	0	0	0	0.11	0.09	0.15	0	0	0.1
AC025271.1	ENSG00000240874.1	0	0.96	0	0	0	0	2.3	0	0.48	0	0	1.15
AC025271.4	ENSG00000276772.1	0.17	0.19	0.14	0.17	0.23	0.38	0.47	0.35	0.18	0.155	0.305	0.41
AC025279.1	ENSG00000198106.8	0	0	0	0	0	0.05	0.02	0	0	0	0.025	0.01
AC025280.2	ENSG00000279622.1	0.06	0.06	0	0	0.15	0.05	0	0	0.06	0	0.1	0
AC025283.2	ENSG00000262621.4	4.81	5.91	3.55	4.78	2.36	3.98	3.94	6.43	5.36	4.165	3.17	5.185
AC025284.1	ENSG00000260701.1	0	0	0	0.43	0.32	0	0.31	0.28	0	0.215	0.16	0.295
AC025287.3	ENSG00000276523.1	0	0	1.94	2.33	4.09	0.5	0	0.39	0	2.135	2.295	0.195
AC025370.1	ENSG00000253851.1	0	0	0	0	0.32	0	0.61	0.28	0	0	0.16	0.445
AC025423.2	ENSG00000256664.1	16.59	15.04	8.49	11.93	5.25	21.29	9.33	15.65	15.815	10.21	13.27	12.49
AC025423.4	ENSG00000257181.1	10.64	8.22	8.24	9.32	9.02	9	10.73	9.56	9.43	8.78	9.01	10.145
AC025431.1	ENSG00000259285.1	0	0	0.17	0.64	0.89	0.75	0	0.28	0	0.405	0.82	0.14
AC025442.1	ENSG00000253744.1	5.51	0.71	1.61	0.64	6.59	2.21	2.22	1.7	3.11	1.125	4.4	1.96
AC025449.1	ENSG00000270558.1	5.08	3.39	0.43	0.52	2.61	2.23	2.92	0.69	4.235	0.475	2.42	1.805
AC025539.1	ENSG00000251152.1	0	0.04	0	0	0.06	0	0.05	0	0.02	0	0.03	0.025
AC025569.1	ENSG00000258168.5	0.05	0	0.09	0.5	0.04	0.04	0.07	0.04	0.025	0.295	0.04	0.055
AC025576.1	ENSG00000255629.1	1.08	0	0	0	0	0.61	0	0	0.54	0	0.305	0
AC025678.3	ENSG00000279092.1	0.09	0.09	0.04	0.11	0.03	0	0	0	0.09	0.075	0.015	0
AC025682.1	ENSG00000263766.5	8.82	2.96	1.35	0.8	7.21	1.37	3.75	3.03	5.89	1.075	4.29	3.39
AC025809.2	ENSG00000278875.1	0.08	0	0.34	0.08	0	0.07	0	0.11	0.04	0.21	0.035	0.055
AC026150.3	ENSG00000270016.1	0	0	0	0	0	0	2.05	0	0	0	0	1.025
AC026191.1	ENSG00000254485.5	4.99	1.87	0.64	1.27	6.05	2.03	1.28	0.98	3.43	0.955	4.04	1.13
AC026202.2	ENSG00000233912.1	0	0	0	0	0.26	0	0.24	0.22	0	0	0.13	0.23
AC026202.3	ENSG00000268509.2	5.04	0.65	2.31	3.29	3.46	1.57	4.23	2.59	2.845	2.8	2.515	3.41
AC026250.1	ENSG00000245522.2	0.07	0.14	0.32	0.45	0	0.06	0.1	0.4	0.105	0.385	0.03	0.25
AC026271.1	ENSG00000174977.8	0.23	0	0.29	0.12	0.31	0.73	0.27	0.08	0.115	0.205	0.52	0.175
AC026271.3	ENSG00000264885.1	11.21	4.32	4.32	2.08	3.22	2.62	6.63	3.92	7.765	3.2	2.92	5.275
AC026304.1	ENSG00000268129.1	1.53	3.5	3.4	5.02	2.37	1.18	1.63	2.43	2.515	4.21	1.775	2.03
AC026310.3	ENSG00000278969.1	0.18	0.13	0.15	0	0.11	0.16	0.19	0.08	0.155	0.075	0.135	0.135
AC026333.3	ENSG00000256249.1	0	0	0.35	0	0.39	0.15	0.07	0.23	0	0.175	0.27	0.15
AC026333.4	ENSG00000274191.1	0.4	1.06	0	0	0	0	0.69	0	0.73	0	0	0.345
AC026356.1	ENSG00000274964.1	2.87	1.91	1.91	2	1.33	1.23	1.72	1.33	2.39	1.955	1.28	1.525
AC026356.2	ENSG00000276115.1	0.75	0.27	0.47	0.67	0.89	0.44	0.65	0.39	0.51	0.57	0.665	0.52
AC026358.1	ENSG00000256596.1	0.06	0	0.05	0.06	0	0	0	0.04	0.03	0.055	0	0.02
AC026362.1	ENSG00000256028.2	0.67	1.44	1.38	1.04	0.78	0.95	0.92	1.8	1.055	1.21	0.865	1.36
AC026362.2	ENSG00000280381.1	0.1	0.03	0	0	0	0	0	0	0.065	0	0	0
AC026367.1	ENSG00000270482.1	0.33	0	0	0.39	0	1.01	0	0.51	0.165	0.195	0.505	0.255
AC026367.2	ENSG00000275409.1	0.79	0.51	0	0	0.35	0	0.34	0.31	0.65	0	0.175	0.325
AC026367.3	ENSG00000275759.1	0	0.45	0.34	0.83	0.62	0.36	0.3	0.27	0.225	0.585	0.49	0.285
AC026369.1	ENSG00000249695.6	0.22	0.18	0	0	0	0	0.11	0	0.2	0	0	0.055
AC026369.2	ENSG00000256694.1	0.15	0	0	0	0	0	0	0	0.075	0	0	0
AC026401.3	ENSG00000280206.1	4.34	8.72	3.44	6.33	3.5	4.24	4.29	5.34	6.53	4.885	3.87	4.815
AC026403.1	ENSG00000229119.3	9.89	5.09	12.02	17.67	12.8	28.57	13.07	17.06	7.49	14.845	20.685	15.065
AC026412.1	ENSG00000188002.10	3.09	3.12	3.91	4.33	2.45	2.63	2.98	3.33	3.105	4.12	2.54	3.155
AC026412.2	ENSG00000232615.4	0	0	0	0	0	0.14	0.35	0	0	0	0.07	0.175
AC026412.3	ENSG00000271119.1	0.54	0.3	0.37	0.82	0.48	0.32	0.78	0.43	0.42	0.595	0.4	0.605
AC026427.1	ENSG00000249772.1	1.17	1.02	0.77	2.33	1.38	1.21	2.33	1.86	1.095	1.55	1.295	2.095
AC026464.4	ENSG00000260914.3	37.4	20.44	35.78	24.25	38.03	21.02	34.32	30.31	28.92	30.015	29.525	32.315
AC026464.6	ENSG00000272617.1	5.02	0	0	0	5.42	0	0	0	2.51	0	2.71	0
AC026469.1	ENSG00000275088.1	0.21	0.09	0.03	0.08	0.08	0.04	0.16	0.08	0.15	0.055	0.06	0.12
AC026471.1	ENSG00000260267.1	2.51	1.39	3.6	1.33	3.03	2.66	2.91	1.87	1.95	2.465	2.845	2.39
AC026471.6	ENSG00000280132.1	0	0.42	0.06	0.08	0	0	0	0	0.21	0.07	0	0
AC026585.1	ENSG00000278532.1	0	0	0.44	0.53	1.89	0.91	0	0	0	0.485	1.4	0
AC026688.1	ENSG00000253886.1	0	0	0.81	0.57	0.25	0.5	0.33	0	0	0.69	0.375	0.165
AC026688.2	ENSG00000254293.1	0	0	14.42	12.2	5.8	16.72	2.35	2.57	0	13.31	11.26	2.46
AC026691.1	ENSG00000270021.1	0	0	0.24	0.22	0.06	0	0	0.24	0	0.23	0.03	0.12
AC026740.1	ENSG00000271781.1	2.06	1.63	3.05	2.74	1.01	1.95	2.79	1.33	1.845	2.895	1.48	2.06
AC026748.1	ENSG00000279908.1	0.13	0.05	0	0	0	0	0.03	0	0.09	0	0	0.015
AC026765.2	ENSG00000257817.1	0	0	0	0	0.21	0.53	0	0.24	0	0	0.37	0.12
AC026774.1	ENSG00000248127.1	0	0	0	0	0.25	0.27	0	0.21	0	0	0.26	0.105
AC026785.2	ENSG00000248223.1	0	0	0	0.22	0	0	0.49	0	0	0.11	0	0.245
AC026801.2	ENSG00000272323.1	0.1	0	0.4	0.1	0.61	0.69	0.23	0.66	0.05	0.25	0.65	0.445
AC026803.2	ENSG00000267898.1	0	0.28	0.43	0	0	0	0	0	0.14	0.215	0	0
AC026951.1	ENSG00000259358.1	0	0	0.05	0.06	0	0	0	0	0	0.055	0	0
AC026954.2	ENSG00000261915.6	0	0.73	0.36	0	0.17	0	0	0.41	0.365	0.18	0.085	0.205
AC026979.2	ENSG00000271869.1	0	0	1.81	0	0	0	0	1.4	0	0.905	0	0.7
AC026979.3	ENSG00000272375.1	0.62	1.15	0.29	0	0	0	0.77	0	0.885	0.145	0	0.385
AC026992.2	ENSG00000261634.3	0.18	0	0	0.15	0	0	0.05	0.17	0.09	0.075	0	0.11
AC027020.1	ENSG00000259540.1	0	0	0.9	0	0.28	0	0.53	0.48	0	0.45	0.14	0.505
AC027020.2	ENSG00000270127.2	0.18	0.06	0.34	0.18	0.48	0.05	0.7	0.2	0.12	0.26	0.265	0.45
AC027031.2	ENSG00000254615.2	1.82	5.55	0.99	1.22	0.42	1.28	0.56	1.22	3.685	1.105	0.85	0.89
AC027097.1	ENSG00000267040.6	3.38	2.2	5.36	4.35	1.03	2.72	1.36	1.81	2.79	4.855	1.875	1.585
AC027097.2	ENSG00000267787.5	0.37	0.17	0.42	0.16	0.07	0.07	0.72	0.06	0.27	0.29	0.07	0.39
AC027139.1	ENSG00000259892.1	0	0	0	0	0	0	0.29	0	0	0	0	0.145
AC027228.2	ENSG00000261762.1	4.19	5.03	1.74	1.95	1.02	1.06	1.05	1.44	4.61	1.845	1.04	1.245
AC027228.3	ENSG00000279373.1	0	0.42	0	0	0.11	0	0	0	0.21	0	0.055	0
AC027237.3	ENSG00000259426.5	1.63	1.53	0.69	0.34	0.7	0.15	1.06	1.91	1.58	0.515	0.425	1.485
AC027277.1	ENSG00000256013.1	0.84	1.11	1.69	1.52	4.41	0	2.52	1.01	0.975	1.605	2.205	1.765
AC027279.1	ENSG00000260816.2	0	0	0.03	0	0	0	0	0.02	0	0.015	0	0.01
AC027279.4	ENSG00000280190.1	0	0	0	0	0	0	0.05	0	0	0	0	0.025
AC027281.2	ENSG00000279123.1	1.33	1.6	0.48	0.29	0.47	1.02	0.22	0	1.465	0.385	0.745	0.11
AC027288.1	ENSG00000257474.5	0.75	2.24	0.19	0.24	0	0	0	0.59	1.495	0.215	0	0.295
AC027288.3	ENSG00000257894.2	0	0	0	0.16	0.15	0	0.06	0	0	0.08	0.075	0.03
AC027290.1	ENSG00000256152.2	3.96	2.78	6.88	8.86	9.13	3.26	13.12	5.04	3.37	7.87	6.195	9.08
AC027290.2	ENSG00000280138.1	0.11	0.06	0.25	0.23	0.13	0.12	0.28	0.13	0.085	0.24	0.125	0.205
AC027307.2	ENSG00000267317.2	1.7	0.87	1.81	3.82	2.85	2.28	2.58	3.35	1.285	2.815	2.565	2.965
AC027307.3	ENSG00000268798.1	1.34	1.17	0.25	0.46	0	0.14	0.24	0.1	1.255	0.355	0.07	0.17
AC027309.1	ENSG00000253445.1	0.42	4.54	0	0	0	0	0.37	0	2.48	0	0	0.185
AC027319.1	ENSG00000267484.1	2.25	1.22	0.46	2.79	7.9	1.44	6.65	2.96	1.735	1.625	4.67	4.805
AC027348.1	ENSG00000275155.1	0.33	6.25	3.46	1.91	2.34	2.65	2.78	2.28	3.29	2.685	2.495	2.53
AC027373.1	ENSG00000260368.1	0	0.32	0	0.29	0.25	0.26	0.11	0.49	0.16	0.145	0.255	0.3
AC027451.1	ENSG00000255402.1	0.39	1.54	1.95	0.47	5.54	2.03	3.36	2.19	0.965	1.21	3.785	2.775
AC027514.1	ENSG00000266900.1	0.09	0	0	0.1	0.08	0	0	0	0.045	0.05	0.04	0
AC027514.2	ENSG00000267560.1	0	1.17	0	0.36	0.28	0	0	0	0.585	0.18	0.14	0
AC027575.2	ENSG00000278107.1	0	0	0	0	0	0	0.6	0	0	0	0	0.3
AC027601.1	ENSG00000260005.6	0.64	0.94	1.11	1.28	1.17	1.15	0.84	1.27	0.79	1.195	1.16	1.055
AC027601.2	ENSG00000262115.1	0	0	0	0.24	0	0	0.18	0	0	0.12	0	0.09
AC027601.3	ENSG00000275542.1	0.45	0	0.47	1.12	1.19	1.94	0.39	0.75	0.225	0.795	1.565	0.57
AC027601.4	ENSG00000276101.1	5.36	2.54	14.06	10.46	13.92	6.39	7.32	9.02	3.95	12.26	10.155	8.17
AC027601.5	ENSG00000279187.1	0.4	0.31	0.6	0.74	0.72	0.3	0.58	0.19	0.355	0.67	0.51	0.385
AC027607.1	ENSG00000248936.1	0	0	0	0	0	0	0.72	0.34	0	0	0	0.53
AC027612.1	ENSG00000223703.1	0.42	0.17	0	0	0.05	0	0	0	0.295	0	0.025	0
AC027627.1	ENSG00000249084.1	0.74	0	0	0	0.22	0	0	0.36	0.37	0	0.11	0.18
AC027644.3	ENSG00000272831.1	1.16	4.05	3.07	3.7	1.37	5.21	3.64	8.92	2.605	3.385	3.29	6.28
AC027682.1	ENSG00000259804.1	0.58	0.45	0.17	0.82	0.51	0.54	0.93	0.14	0.515	0.495	0.525	0.535
AC027682.2	ENSG00000259945.1	0	0	3.84	0	2.87	0	0	1.43	0	1.92	1.435	0.715
AC027682.4	ENSG00000261386.2	0.45	1.13	1.61	0.25	1.78	0.9	0.18	0	0.79	0.93	1.34	0.09
AC027682.7	ENSG00000280214.1	0.34	0.45	0.33	0.14	0.37	0.12	0.21	0.18	0.395	0.235	0.245	0.195
AC027702.1	ENSG00000260588.1	1.52	1.65	0.14	0.42	0	0.22	0.26	0.45	1.585	0.28	0.11	0.355
AC027763.1	ENSG00000262503.1	1.31	1.26	0.24	0	1.39	0.5	0	0.39	1.285	0.12	0.945	0.195
AC027796.1	ENSG00000261916.1	0.9	0	1.39	0.55	0.39	0	1.56	0	0.45	0.97	0.195	0.78
AC027796.3	ENSG00000262304.1	0.99	0.52	1.86	3	1.5	0.01	1.94	0	0.755	2.43	0.755	0.97
AC027796.4	ENSG00000262903.1	0.6	0	0	0.21	0.53	0.75	0.32	0.71	0.3	0.105	0.64	0.515
AC034102.1	ENSG00000237493.3	1.7	0.86	0.98	0.39	1.8	1.03	0.86	1.05	1.28	0.685	1.415	0.955
AC034102.4	ENSG00000257553.1	11.59	9.31	0	0	4.8	0.72	5.04	6.14	10.45	0	2.76	5.59
AC034102.5	ENSG00000257809.1	1.23	0.54	0	0	1.44	0.43	0	0	0.885	0	0.935	0
AC034102.6	ENSG00000258317.1	1.77	1.88	2	0.88	1.58	1.1	1.11	1.15	1.825	1.44	1.34	1.13
AC034111.1	ENSG00000260093.1	0	0.04	0	0	0	0	0.03	0	0.02	0	0	0.015
AC034198.2	ENSG00000272263.1	3.15	0.61	0	1.12	0.4	0.48	1.96	0.74	1.88	0.56	0.44	1.35
AC034229.3	ENSG00000271998.1	0.18	0.06	0.05	0	0	0	0	0	0.12	0.025	0	0
AC034229.4	ENSG00000272417.1	0.59	0	0	0	0	0	0	0	0.295	0	0	0
AC034231.1	ENSG00000249572.1	0.82	3.83	0.41	0.5	1.82	2.59	1.42	0.66	2.325	0.455	2.205	1.04
AC034236.1	ENSG00000185641.6	0.85	2.35	0	0	1.19	1.17	0.85	3.67	1.6	0	1.18	2.26
AC034236.2	ENSG00000271918.1	0.19	0.52	0.77	0.38	0.25	0.67	0.51	0.25	0.355	0.575	0.46	0.38
AC034243.1	ENSG00000253404.1	0	4.1	2.41	3.34	2.83	5.06	0	4.99	2.05	2.875	3.945	2.495
AC036103.1	ENSG00000261002.5	0	0	0	0.23	0.19	0	0	0	0	0.115	0.095	0
AC036108.2	ENSG00000261054.1	0.84	0.24	9.3	7.79	10.54	10.39	10.51	4.83	0.54	8.545	10.465	7.67
AC036108.3	ENSG00000261616.1	0	0.06	0.13	0.32	0.09	0.14	0.45	0.18	0.03	0.225	0.115	0.315
AC036176.1	ENSG00000267390.1	0	0.82	1.44	1.01	1.44	1.32	0.38	0.67	0.41	1.225	1.38	0.525
AC036214.1	ENSG00000249328.2	0	0.07	0.17	0	0	0	0.11	0.05	0.035	0.085	0	0.08
AC036214.2	ENSG00000272518.1	0.38	0.43	0.65	0.8	0.33	0	0.15	0	0.405	0.725	0.165	0.075
AC036214.3	ENSG00000276418.4	0	0	0.37	0.23	0	0	0.09	0.19	0	0.3	0	0.14
AC037198.1	ENSG00000276107.1	0.25	0	0	0.28	0	0	0	0	0.125	0.14	0	0
AC037198.2	ENSG00000278621.1	0.85	0	0.43	0.52	0	0	0	0.69	0.425	0.475	0	0.345
AC037441.1	ENSG00000248738.6	0.75	0	0	0.07	0	0	0	0.07	0.375	0.035	0	0.035
AC037459.1	ENSG00000248235.6	4.86	0	2.68	1.72	0.69	0.77	1.73	1.29	2.43	2.2	0.73	1.51
AC037459.2	ENSG00000251034.1	0.03	0.14	0.08	0.17	0.09	0.06	0.26	0.11	0.085	0.125	0.075	0.185
AC037459.3	ENSG00000253200.1	2.94	2.05	2.44	1.58	2.81	1.26	2.15	2.28	2.495	2.01	2.035	2.215
AC037459.4	ENSG00000254230.1	0.72	2.29	0.69	2.1	1.58	1.09	3.63	1.12	1.505	1.395	1.335	2.375
AC037471.2	ENSG00000261554.1	0.69	0	0	0	0	0	0	0	0.345	0	0	0
AC037487.4	ENSG00000280299.1	0	0.4	0.61	0	0	0	0.27	0	0.2	0.305	0	0.135
AC040160.1	ENSG00000262691.1	0.85	0.57	0.04	0.16	0.19	0	0.16	0.07	0.71	0.1	0.095	0.115
AC040160.2	ENSG00000280163.1	0	0	0.15	0.18	0	0	0	0.06	0	0.165	0	0.03
AC040162.1	ENSG00000261884.2	5.23	6.73	0.37	0.42	1.02	0.23	1.58	0.38	5.98	0.395	0.625	0.98
AC040162.3	ENSG00000263126.1	0.4	0.38	0.43	0.52	0.68	0.2	0.29	0.71	0.39	0.475	0.44	0.5
AC040169.1	ENSG00000260018.1	2.17	6.43	0.89	2.13	1.91	4.61	0.38	3.54	4.3	1.51	3.26	1.96
AC040169.3	ENSG00000274677.1	0.67	0.42	0.32	0	0.29	0	0	0.77	0.545	0.16	0.145	0.385
AC044787.1	ENSG00000213862.4	0	0	0	0.25	0.2	0	0	0.17	0	0.125	0.1	0.085
AC044802.1	ENSG00000246777.1	0.1	0.21	0.16	0.24	0.13	0.13	0.49	0.13	0.155	0.2	0.13	0.31
AC044810.2	ENSG00000254951.7	0.06	0	0.05	0.51	0	0	0.04	0.26	0.03	0.28	0	0.15
AC044839.2	ENSG00000255226.1	0	0	0.84	1.01	4.03	0.87	0.36	3.02	0	0.925	2.45	1.69
AC044849.1	ENSG00000272256.1	18.94	2.26	3.65	0.89	13.7	3.87	5.92	3.55	10.6	2.27	8.785	4.735
AC044860.1	ENSG00000229212.7	9.09	11.69	10.27	6.97	5.19	10.06	8.06	7.92	10.39	8.62	7.625	7.99
AC046130.1	ENSG00000245482.2	1.13	0.29	0.16	0.27	0.83	0.64	1.03	0.66	0.71	0.215	0.735	0.845
AC046130.2	ENSG00000256538.1	0	0	0.4	0.49	0.4	0.86	0	0	0	0.445	0.63	0
AC046143.1	ENSG00000229334.1	0.87	0.6	0.15	0.18	0.62	0.16	0.14	0.49	0.735	0.165	0.39	0.315
AC046158.2	ENSG00000261837.1	0	0	0	0	0.24	0.26	0	0	0	0	0.25	0
AC046158.3	ENSG00000279129.1	0	0.06	0	0.28	0.05	0	0	0.04	0.03	0.14	0.025	0.02
AC046168.1	ENSG00000259362.2	0.15	0.04	0	0	0.03	0	0.03	0.1	0.095	0	0.015	0.065
AC046176.1	ENSG00000236814.1	0	0.31	0	0	0.24	0.25	0.22	0	0.155	0	0.245	0.11
AC046185.2	ENSG00000270587.1	1.35	1.08	0.83	1.95	0.59	0	5.07	0.65	1.215	1.39	0.295	2.86
AC046185.3	ENSG00000279369.1	2.2	2.13	2.25	1.8	2.32	1.15	2.35	3	2.165	2.025	1.735	2.675
AC048338.1	ENSG00000256861.1	8.52	0	0.49	1.9	8.88	0	6.16	0.87	4.26	1.195	4.44	3.515
AC048341.1	ENSG00000257354.2	0.66	0.71	0.23	0.24	0.14	0.18	0.2	0.13	0.685	0.235	0.16	0.165
AC048341.2	ENSG00000275180.1	1.93	5.37	0.51	0.61	1.27	0.53	0	0.81	3.65	0.56	0.9	0.405
AC048344.4	ENSG00000277342.1	1.28	0	0.43	0	0	0	0	0	0.64	0.215	0	0
AC048380.2	ENSG00000278983.1	0	0	0	0.23	0.11	0	0.12	0	0	0.115	0.055	0.06
AC048382.2	ENSG00000259244.1	0	0	2.03	1.22	1.5	0	0	3.85	0	1.625	0.75	1.925
AC048382.6	ENSG00000276278.1	12.77	8.01	2.73	2.01	3.24	2	2.47	2.59	10.39	2.37	2.62	2.53
AC051619.6	ENSG00000259539.1	0	0	1.01	0	0.31	0.35	0	0	0	0.505	0.33	0
AC053503.2	ENSG00000229525.1	0	0	0	0.29	0	0	0.07	0	0	0.145	0	0.035
AC053503.5	ENSG00000268603.1	0	0	0.59	0	0.28	0	0	0.48	0	0.295	0.14	0.24
AC055713.1	ENSG00000247373.3	4.23	0.87	1.56	0.96	4.12	1.07	2.74	1.08	2.55	1.26	2.595	1.91
AC055717.1	ENSG00000251536.2	0.15	0	0	0	0	0	0	0	0.075	0	0	0
AC055811.1	ENSG00000263624.1	0	0.14	0.43	0	0.23	0.23	0.1	0.44	0.07	0.215	0.23	0.27
AC055811.2	ENSG00000264187.1	0.41	0.38	2.07	0.7	0.71	0.84	0.99	0.04	0.395	1.385	0.775	0.515
AC055811.3	ENSG00000266498.1	0	0	0.77	0	0	0.55	1.16	0	0	0.385	0.275	0.58
AC055811.4	ENSG00000278864.1	2.64	0.84	1.81	2.66	2.28	1.05	2.32	1.09	1.74	2.235	1.665	1.705
AC055822.1	ENSG00000272155.1	0.58	2.6	0.66	0.79	0	2.02	2.11	0.52	1.59	0.725	1.01	1.315
AC055876.1	ENSG00000232431.3	0	0	0	0	0	0.36	0.16	0.14	0	0	0.18	0.15
AC060766.1	ENSG00000267102.1	4.47	3.22	1.21	4.79	6.24	4.48	2.42	4.16	3.845	3	5.36	3.29
AC060766.4	ENSG00000267547.1	0.82	3.28	1.66	1	1.09	2.59	1.06	2.66	2.05	1.33	1.84	1.86
AC060766.5	ENSG00000267648.1	3.16	1.32	1.35	1.49	1.52	1.2	1.81	1.04	2.24	1.42	1.36	1.425
AC060766.7	ENSG00000267745.1	0.44	1.68	1.91	3.67	0.29	1.26	3.1	3.32	1.06	2.79	0.775	3.21
AC060780.1	ENSG00000267002.1	0.81	0.9	0.34	0	0.48	1.09	0.96	0.83	0.855	0.17	0.785	0.895
AC060834.1	ENSG00000197320.5	0	0	0	0.07	0.07	0	0.06	0	0	0.035	0.035	0.03
AC061975.1	ENSG00000260777.1	0.1	0	0	0.05	0	0.05	0	0.07	0.05	0.025	0.025	0.035
AC061975.6	ENSG00000266830.1	0	0	0.08	0.2	0.09	0.09	0.08	0	0	0.14	0.09	0.04
AC061975.7	ENSG00000267644.1	0	0.63	0.47	0	0	0	0.21	0	0.315	0.235	0	0.105
AC061992.1	ENSG00000266970.1	0.48	1.67	5.15	4.25	6.1	8.8	3.13	4.83	1.075	4.7	7.45	3.98
AC063926.3	ENSG00000279905.1	0.02	0	0	0	0	0	0	0	0.01	0	0	0
AC063947.1	ENSG00000258007.1	0	0	0.77	0	0	0	0	0.62	0	0.385	0	0.31
AC063976.2	ENSG00000224431.1	0	0	0.03	0	0.03	0.07	0	0	0	0.015	0.05	0
AC064799.1	ENSG00000212664.5	0.75	0	0.39	0	1.28	0	0.51	0	0.375	0.195	0.64	0.255
AC064801.2	ENSG00000279236.1	0	0	0.2	0	0.11	0.22	0	0.33	0	0.1	0.165	0.165
AC064802.1	ENSG00000254339.5	21.85	33.5	0.19	0.65	0	0	0.23	0	27.675	0.42	0	0.115
AC064807.1	ENSG00000228801.5	2.31	3.05	8.66	6.81	4.63	6.88	5.87	6.88	2.68	7.735	5.755	6.375
AC064807.4	ENSG00000272024.1	0	0	0.87	4.1	0	0.87	0	0.68	0	2.485	0.435	0.34
AC064836.3	ENSG00000273456.1	0.58	0.35	1.87	0.97	1.28	0.85	0	0.65	0.465	1.42	1.065	0.325
AC066612.2	ENSG00000259385.1	0	0.67	0.76	0	0	0	0	0	0.335	0.38	0	0
AC067750.1	ENSG00000272631.1	0.25	0.39	0.86	0.6	1.05	0.39	1	0.58	0.32	0.73	0.72	0.79
AC067838.1	ENSG00000272338.2	1.83	1.41	2.14	0.43	0.32	0.37	0.62	1.15	1.62	1.285	0.345	0.885
AC067852.2	ENSG00000266962.2	10.24	8	13.66	10.05	11.52	9.04	13.24	11.88	9.12	11.855	10.28	12.56
AC067852.3	ENSG00000267632.1	0.86	0.66	0.56	0.78	0.61	0.08	0.94	0.46	0.76	0.67	0.345	0.7
AC067930.4	ENSG00000254859.1	0	0	0.49	0.59	1.24	1.02	1.24	0	0	0.54	1.13	0.62
AC067930.5	ENSG00000255050.1	0.27	0.77	0.23	0.14	0.98	0.62	0.22	1.04	0.52	0.185	0.8	0.63
AC067930.6	ENSG00000279605.1	5.11	4.15	2.7	2.73	2.05	2.42	2.22	2.52	4.63	2.715	2.235	2.37
AC067931.1	ENSG00000279766.1	0.87	0.71	0	0	0	0	0	0.22	0.79	0	0	0.11
AC067931.2	ENSG00000280326.1	0.1	0	0.08	0.2	0	0.09	0	0.2	0.05	0.14	0.045	0.1
AC067942.1	ENSG00000227304.3	0	0.18	0	0	0	0	0.12	0	0.09	0	0	0.06
AC067968.1	ENSG00000267022.1	0.4	0	0.2	0.45	0.25	0.5	0.07	0.37	0.2	0.325	0.375	0.22
AC068134.2	ENSG00000237087.1	0.37	0	0	0	0.65	0.37	0.62	0	0.185	0	0.51	0.31
AC068134.3	ENSG00000251485.1	1.59	1.23	0.76	2.12	0.73	0	0.29	2.65	1.41	1.44	0.365	1.47
AC068152.1	ENSG00000262879.5	14.69	7.02	12.35	11.08	8.87	6.61	6.37	11.17	10.855	11.715	7.74	8.77
AC068254.2	ENSG00000279221.1	0	0	0.12	0.15	0.1	0.07	0	0.1	0	0.135	0.085	0.05
AC068282.1	ENSG00000236682.1	0.21	0.45	0.08	0.1	0.14	0.14	0.04	0.49	0.33	0.09	0.14	0.265
AC068338.2	ENSG00000260274.1	1.19	1.19	2.05	1.32	2.88	2.02	2.12	2.93	1.19	1.685	2.45	2.525
AC068385.1	ENSG00000255498.1	47.64	5.59	3.44	2.02	9.63	6.85	13.02	7.33	26.615	2.73	8.24	10.175
AC068446.1	ENSG00000237161.4	0	0	0	0	0	0.09	0.15	0	0	0	0.045	0.075
AC068446.2	ENSG00000247765.2	0.17	0.07	0	0	0	0	0	0	0.12	0	0	0
AC068448.1	ENSG00000279912.1	0	0	0.03	0	0.06	0.03	0.04	0	0	0.015	0.045	0.02
AC068473.1	ENSG00000178412.4	0	0.17	0.12	0	0	0	0	0	0.085	0.06	0	0
AC068473.5	ENSG00000274828.1	0.42	0.99	0.97	1.27	0.82	0.99	0.71	1.27	0.705	1.12	0.905	0.99
AC068491.4	ENSG00000279191.1	0.12	0	0	0.2	0	0	0.1	0	0.06	0.1	0	0.05
AC068580.3	ENSG00000235027.1	0.73	0.71	0.77	0.15	0.39	0.38	0.9	0.87	0.72	0.46	0.385	0.885
AC068580.4	ENSG00000250644.2	0	0.39	0	0	1.3	0	0.56	0.25	0.195	0	0.65	0.405
AC068620.1	ENSG00000269921.1	0	0.57	0	0.52	0.37	0	0.73	0.34	0.285	0.26	0.185	0.535
AC068631.1	ENSG00000197099.8	0.77	0.62	0.47	1.7	0.45	0.72	0.84	0.38	0.695	1.085	0.585	0.61
AC068669.1	ENSG00000279199.1	0.39	0.63	0.1	0.32	0.12	0.17	0.3	0.04	0.51	0.21	0.145	0.17
AC068700.1	ENSG00000260398.1	0.04	0.08	0.03	0.11	0	0.03	0	0	0.06	0.07	0.015	0
AC068768.1	ENSG00000235423.8	4.07	6.01	6.06	8.45	4.28	7.12	7.93	5.24	5.04	7.255	5.7	6.585
AC068768.2	ENSG00000269980.1	0	0	0	0	0.91	1.64	1.12	0	0	0	1.275	0.56
AC068790.1	ENSG00000256827.1	0.96	0	0	1.7	0	0	0	0	0.48	0.85	0	0
AC068790.2	ENSG00000269938.1	0	0	1.92	0	1.03	0.4	0	0.92	0	0.96	0.715	0.46
AC068790.3	ENSG00000269997.1	0	0	0.39	3.29	0	0.41	0.67	0	0	1.84	0.205	0.335
AC068790.5	ENSG00000270061.1	0	0	0	6.79	0.83	0	0	4.47	0	3.395	0.415	2.235
AC068790.9	ENSG00000275389.1	0	0	0.08	0	0	0.09	0	0	0	0.04	0.045	0
AC068792.1	ENSG00000275769.1	0.66	1.05	0	0	0	0	0	0	0.855	0	0	0
AC068831.1	ENSG00000258384.1	0.16	0	0.26	0.16	0.07	0.07	0.43	0.27	0.08	0.21	0.07	0.35
AC068831.4	ENSG00000259661.1	1.82	6.45	6.46	7.41	4.23	5.38	5.54	7.4	4.135	6.935	4.805	6.47
AC068860.1	ENSG00000279266.1	0	0	0.03	0.11	0	0.03	0.06	0	0	0.07	0.015	0.03
AC068870.2	ENSG00000277782.1	0	2.65	0	0	0	0	2.24	0	1.325	0	0	1.12
AC068888.1	ENSG00000257337.6	4.9	4.15	1.14	1.51	0.97	0.47	1.62	1.51	4.525	1.325	0.72	1.565
AC068896.1	ENSG00000258539.1	0.32	0.26	0.08	0.07	0.1	0.35	0.25	0.32	0.29	0.075	0.225	0.285
AC068946.1	ENSG00000280537.2	0	0	0.22	0.05	0.11	0.04	0.21	0.19	0	0.135	0.075	0.2
AC068987.1	ENSG00000259887.1	0	0	0	0	0.55	0.75	0	0	0	0	0.65	0
AC068987.2	ENSG00000260122.1	0.77	2.02	2.52	0.82	0.17	1.8	2.02	0.55	1.395	1.67	0.985	1.285
AC068987.3	ENSG00000260473.1	0	0	0.14	0	0	0.15	0.39	0	0	0.07	0.075	0.195
AC068987.4	ENSG00000261586.2	2.72	3.02	26.25	19.27	15.16	19.72	23.2	16.47	2.87	22.76	17.44	19.835
AC069148.1	ENSG00000273209.1	5.96	7.66	0.64	0.26	0	0.68	0	0	6.81	0.45	0.34	0
AC069185.1	ENSG00000255046.1	0.22	0.52	0	0.24	0.59	0.58	0.36	0.64	0.37	0.12	0.585	0.5
AC069222.1	ENSG00000273374.1	0	0.04	0.03	0	0	0	0.16	0.03	0.02	0.015	0	0.095
AC069224.1	ENSG00000260572.1	0	0.1	0.14	0.18	0.23	0.08	0	0.18	0.05	0.16	0.155	0.09
AC069234.2	ENSG00000256364.1	145.64	64.41	54.36	41.15	73.4	50.31	77.58	56.09	105.025	47.755	61.855	66.835
AC069234.3	ENSG00000256569.1	53.56	37.35	29.72	29.71	22.46	22.27	37.89	30.36	45.455	29.715	22.365	34.125
AC069234.5	ENSG00000277423.1	2.66	0	0.81	0.96	0	0	0	0.63	1.33	0.885	0	0.315
AC069257.3	ENSG00000272741.1	0	0.52	0	0	0	0	0.56	0	0.26	0	0	0.28
AC069277.1	ENSG00000189229.10	0.76	0.17	0.77	0	1.75	0.14	1.28	0.21	0.465	0.385	0.945	0.745
AC069281.2	ENSG00000274272.1	2.45	1.95	3.46	2.85	2.63	2.22	2.65	2.85	2.2	3.155	2.425	2.75
AC069282.1	ENSG00000225507.1	1.71	1.72	1.74	1.57	0	2.26	1.11	0.69	1.715	1.655	1.13	0.9
AC069287.2	ENSG00000254559.1	8.86	9.06	8.65	7.41	12.05	12.83	10.34	7.53	8.96	8.03	12.44	8.935
AC069307.1	ENSG00000269949.1	0	1.71	0	0	0.5	0.66	1.57	0.51	0.855	0	0.58	1.04
AC069368.1	ENSG00000249240.2	3.03	5.1	1.01	0.24	2.29	0	2.91	0	4.065	0.625	1.145	1.455
AC069431.2	ENSG00000270554.1	0	0	0	0	0	0.14	0.12	0	0	0	0.07	0.06
AC069499.1	ENSG00000241634.1	6.33	1.85	0.47	2.81	0.8	2.42	1.18	2.24	4.09	1.64	1.61	1.71
AC069499.2	ENSG00000276763.1	0.8	0	0	0	0.7	0	0.79	0	0.4	0	0.35	0.395
AC069544.1	ENSG00000272853.1	0.17	1.34	0.43	0.88	0.15	1.7	0.27	0.7	0.755	0.655	0.925	0.485
AC069547.1	ENSG00000279863.1	0.38	0.31	0.94	1.06	1.28	0.51	0.75	0.45	0.345	1	0.895	0.6
AC072061.1	ENSG00000259826.1	0.06	0.21	0.1	0.06	0.46	0.28	0.3	0.09	0.135	0.08	0.37	0.195
AC073046.1	ENSG00000235499.1	1.53	1.31	5.07	4.73	9.99	2	6.68	3.9	1.42	4.9	5.995	5.29
AC073050.1	ENSG00000228222.1	10.26	0.78	0	0	2.84	0	0	0	5.52	0	1.42	0
AC073052.1	ENSG00000228446.2	0	0	0	0	0	0.26	0.22	0	0	0	0.13	0.11
AC073052.2	ENSG00000274629.1	13.26	17.03	12.37	15.37	11.75	10.1	15.26	13.28	15.145	13.87	10.925	14.27
AC073072.1	ENSG00000179428.2	0	0	0	0.47	0	0	0.09	0.16	0	0.235	0	0.125
AC073073.2	ENSG00000272604.1	0.5	0.59	0.09	0.33	0.35	0.39	0.39	0.4	0.545	0.21	0.37	0.395
AC073107.1	ENSG00000272693.3	0.08	0	0.06	0.15	0.27	0	0.17	0.2	0.04	0.105	0.135	0.185
AC073111.1	ENSG00000239377.1	0	1.03	0	0.93	0.57	0	1.82	0.61	0.515	0.465	0.285	1.215
AC073130.3	ENSG00000279086.1	0.13	0	0.05	0	0.28	0.06	0.34	0.17	0.065	0.025	0.17	0.255
AC073174.1	ENSG00000227121.1	0	0	6.55	4.81	0	3.28	4.39	6.37	0	5.68	1.64	5.38
AC073195.1	ENSG00000271855.1	0.6	0.69	1.04	0.85	1.41	0.74	0.16	1.27	0.645	0.945	1.075	0.715
AC073254.1	ENSG00000237126.8	19.79	12.9	11.81	5.52	8.13	10.22	12.03	7.83	16.345	8.665	9.175	9.93
AC073283.1	ENSG00000225187.1	0	0	0	0.22	0	0.19	0.16	0.15	0	0.11	0.095	0.155
AC073283.2	ENSG00000226087.1	0	0	1.36	2.06	0.34	1.43	1.49	0.55	0	1.71	0.885	1.02
AC073316.3	ENSG00000236708.1	0.17	0.2	0.88	0.9	1.37	1.26	0.55	1.93	0.185	0.89	1.315	1.24
AC073323.1	ENSG00000232524.1	0.57	0	0	0	0	0	0	0	0.285	0	0	0
AC073342.1	ENSG00000231840.1	1.1	0	0.61	0	1.93	0.63	0	2.42	0.55	0.305	1.28	1.21
AC073343.2	ENSG00000228010.5	0.84	0.56	0.42	0.51	0	0.88	0.36	1.02	0.7	0.465	0.44	0.69
AC073346.2	ENSG00000279288.1	0	0	0	0	0	0.06	0.11	0	0	0	0.03	0.055
AC073349.1	ENSG00000189316.3	0.16	0	0	0.49	0	0	0.12	0.22	0.08	0.245	0	0.17
AC073349.2	ENSG00000234338.1	2.36	0.1	1.47	0.48	2.02	0.5	1.48	0.51	1.23	0.975	1.26	0.995
AC073352.1	ENSG00000272662.1	0.46	0	0	0	0.81	0.5	0	0.38	0.23	0	0.655	0.19
AC073389.1	ENSG00000268584.1	0	0	1.01	0.49	1.01	2.58	0.92	1.48	0	0.75	1.795	1.2
AC073389.3	ENSG00000272791.1	0	0.21	0.16	0.58	0.81	0.17	0	0.26	0.105	0.37	0.49	0.13
AC073410.1	ENSG00000236047.1	0	0.45	0	0.41	0.63	0.72	0	0.55	0.225	0.205	0.675	0.275
AC073439.1	ENSG00000279328.1	0.08	0	0	0.08	0.07	0.15	0	0	0.04	0.04	0.11	0
AC073476.1	ENSG00000237641.1	1.4	0	2.62	1.02	2.43	1.74	5.93	0	0.7	1.82	2.085	2.965
AC073476.2	ENSG00000260622.1	0.47	0.65	0	0	0.41	0	0	0	0.56	0	0.205	0
AC073476.3	ENSG00000261096.1	0.06	0.12	0	0.06	0.15	0.05	0.09	0.15	0.09	0.03	0.1	0.12
AC073508.2	ENSG00000264058.1	0.64	0.86	0.44	0.69	0.34	0.39	0.78	0.77	0.75	0.565	0.365	0.775
AC073508.3	ENSG00000278834.1	3.05	2.77	4.5	4.11	3.39	3.4	3.68	5.1	2.91	4.305	3.395	4.39
AC073529.1	ENSG00000234129.7	0.76	1.45	0	0	0	1.16	0.32	0.89	1.105	0	0.58	0.605
AC073534.1	ENSG00000268442.1	0	0	0.13	0.33	0.28	0.14	0	0	0	0.23	0.21	0
AC073548.1	ENSG00000279861.1	0.34	0	0.84	0.47	1.32	0.75	0.49	0.63	0.17	0.655	1.035	0.56
AC073569.1	ENSG00000258044.1	0	0	0	0	0	0	0.24	0.44	0	0	0	0.34
AC073569.2	ENSG00000258048.1	19.41	3.86	3	6.87	16.72	12.92	8.04	2.26	11.635	4.935	14.82	5.15
AC073569.3	ENSG00000277130.1	0	0	0	0.63	0	0.55	0.7	0	0	0.315	0.275	0.35
AC073575.2	ENSG00000274227.1	2.57	2.81	0	1.1	1.42	0.32	1.34	1.22	2.69	0.55	0.87	1.28
AC073592.3	ENSG00000279071.1	0.32	0.26	0	0.16	0	0.14	0.06	0	0.29	0.08	0.07	0.03
AC073592.5	ENSG00000279121.1	0	1.14	0.43	0	0	0	0	0	0.57	0.215	0	0
AC073592.6	ENSG00000279334.1	0	0	0	0.96	0.58	0	0	0	0	0.48	0.29	0
AC073592.7	ENSG00000279527.1	0	0	0.47	0	0	0.49	0	0	0	0.235	0.245	0
AC073610.1	ENSG00000239617.1	0	0	0	0	0	0	0.71	0.74	0	0	0	0.725
AC073611.1	ENSG00000257605.2	0.61	1.14	0.57	0	0.54	1.81	0	0	0.875	0.285	1.175	0
AC073612.1	ENSG00000258064.1	0	0	1.81	0.18	1.01	0	0	0	0	0.995	0.505	0
AC073641.1	ENSG00000228802.1	1.87	0.96	2.21	0	2.73	0	0.58	0	1.415	1.105	1.365	0.29
AC073834.1	ENSG00000237655.1	0	0	0.34	0.41	0.31	0.36	0.6	0	0	0.375	0.335	0.3
AC073842.2	ENSG00000242798.1	1.86	1.92	2.18	1.76	1.31	0.76	1.58	0.88	1.89	1.97	1.035	1.23
AC073857.1	ENSG00000280120.1	2.16	3.28	1.87	2.48	1.25	1.44	2.62	1.96	2.72	2.175	1.345	2.29
AC073861.1	ENSG00000242299.1	1.64	3.18	1.82	5.06	4.79	5.58	3.93	5.27	2.41	3.44	5.185	4.6
AC073864.1	ENSG00000255686.1	0.38	0	0	0.45	0	0	0	0	0.19	0.225	0	0
AC073869.1	ENSG00000152117.17	4.6	5.36	4.61	5.39	3.61	2.7	4.57	5.51	4.98	5	3.155	5.04
AC073896.1	ENSG00000144785.8	83.98	73.17	53.66	37.51	48.94	66.94	54.12	64.42	78.575	45.585	57.94	59.27
AC073896.2	ENSG00000257303.1	2.19	3.65	0.93	3.3	3.89	14.08	1.1	3.28	2.92	2.115	8.985	2.19
AC073896.3	ENSG00000257740.1	3.61	0	0	0	0.53	0	2.75	0.55	1.805	0	0.265	1.65
AC073909.1	ENSG00000235071.1	0.17	0	0.14	0.18	0	0	0	0	0.085	0.16	0	0
AC073910.1	ENSG00000226774.1	0	0	0.69	0	1.05	0	0	2.18	0	0.345	0.525	1.09
AC073911.3	ENSG00000279817.1	0.32	0	0	0.36	0	0	0	0	0.16	0.18	0	0
AC073912.3	ENSG00000279650.1	0	0	0	0.44	0	0	0.17	0	0	0.22	0	0.085
AC073957.2	ENSG00000257607.1	0.29	0.64	0.32	0.99	0.78	0.78	0.46	1.25	0.465	0.655	0.78	0.855
AC073957.3	ENSG00000273151.1	2.14	1.81	4.43	2.95	3.92	2.24	3.74	2.4	1.975	3.69	3.08	3.07
AC074032.1	ENSG00000272368.2	0.55	0	0.25	0.3	0.46	0.53	0.45	1.27	0.275	0.275	0.495	0.86
AC074044.1	ENSG00000272844.1	0	0	0	0.3	0.71	0.52	0.22	0.79	0	0.15	0.615	0.505
AC074050.3	ENSG00000261731.2	0.59	0	0	1.61	0.52	0	0	0	0.295	0.805	0.26	0
AC074050.4	ENSG00000276867.1	0	0.56	0	0.51	0	0	0.36	0.34	0.28	0.255	0	0.35
AC074091.1	ENSG00000259080.1	0	0.19	0	0.6	0.28	0	0	0	0.095	0.3	0.14	0
AC074117.1	ENSG00000234072.1	8.81	8.51	7	6.74	7.23	7.86	5.77	6.11	8.66	6.87	7.545	5.94
AC074135.1	ENSG00000267886.1	44.77	27.04	23.3	23.8	21.81	14.41	27.45	24.77	35.905	23.55	18.11	26.11
AC074138.1	ENSG00000276071.1	1.21	0.13	0.2	0	0.21	0.11	0.95	0.08	0.67	0.1	0.16	0.515
AC074143.1	ENSG00000265690.7	0	0	0	0.27	0	0	0.16	0.13	0	0.135	0	0.145
AC074212.1	ENSG00000259605.3	20.54	25.06	19.09	20.7	14.97	16.69	15.69	21.58	22.8	19.895	15.83	18.635
AC074367.1	ENSG00000233716.1	0	0.49	0	0	0	0	0.11	0	0.245	0	0	0.055
AC074387.1	ENSG00000282033.1	1.08	1.02	0	0.7	0.38	1.23	0	0	1.05	0.35	0.805	0
[truncated: 21,186 more rows]

## Sheet: DifferentiallyExpressed_top100
DifferentiallyExpressed_top100
ABCA4
AC002094.1
AC007325.4
AC008738.5
AC009041.2
AC009446.1
AC010478.1
AC064802.1
AC069148.1
ACADL
ACKR3
ADAMTS18
ADAMTS8
ADAMTS9
ADCY8
ADCYAP1R1
ADORA1
AHNAK
AKR1D1
AL096711.2
AL117378.1
AL161747.2
AL358473.1
ALDH1A2
ALDH3B2
AMER2
ANKRD1
ANO1
AP002856.2
APLNR
ARC
ARHGAP24
ARMC4
ATCAY
ATP12A
ATP1A2
ATP1A3
B3GALT5
B3GALT5-AS1
BARX2
BMPER
BTBD17
C11orf96
C1orf94
C3orf70
CABP1
CACNA1B
CAMKV
CCDC177
CD274
CDCA7L
CDX1
CDX2
CHRNA4
CHST9
CLIC5
CNTN2
CNTNAP3B
COL6A6
CRH
CSF1R
CYP2B6
CYSLTR2
D21S2088E
DIO2
DIO3
DIO3OS
DLEU7
DLL3
DLX2
DLX5
DLX6
DLX6-AS1
DMRTA2
EMX1
EN1
ENPEP
EPAS1
ERP27
ESRG
EVPL
FAM189A1
FFAR4
FGFBP3
FOXD3
FOXD3-AS1
FOXF2
FOXI1
FRZB
FXYD7
GATA2
GATA2-AS1
GATA3
GATA3-AS1
GATA5
GCK
GDPD2
GFPT2
GGT3P
GLB1L3
GLP1R
GREB1L
GRHL3
GRIA4
GRIN2B
GRPR
HAND1
HAPLN1
HBA1
HBA2
HBB
HECW1
HES3
HESX1
HEY1
HIST2H2AA4
HMX1
HOXB2
HOXB3
HOXB5
HOXB6
HOXC13
HPAT5
HPGD
HRH3
HS3ST2
HTR1E
IDO1
IGFBP3
IGSF21
INHBE
IRF4
ISL1
ITGB6
JAKMIP2-AS1
JPH4
KANK4
KAT2B
KCND2
KCNK13
KCNN3
KIF21B
KLKB1
KRT16
KRT16P1
KRT16P2
KRT16P3
KRT80
LCK
LEFTY1
LEFTY2
LINC00599
LINC00698
LINC01108
LINC01194
LINC02188
LINC02458
LINC02570
LINC02593
LIX1L
LMO1
LMO3
LNCPRESS1
LNCPRESS2
LRAT
LRRC20
LUM
LZTS1
MAB21L3
MAP6
MAT1A
MEGF10
MEIS1
MEIS2
MGAT4C
MIAT
MLKL
MPPED2
MSX1
MSX2
NANOG
NAV3
NECTIN4
NIPAL4
NOTUM
NOVA2
NPNT
NR5A2
NRROS
NRXN2
OTX2
P2RY6
PAPLN
PAQR9
PARM1
PCAT14
PDLIM3
PHYHIP
PIK3AP1
PIM2
PLA2G2A
PLXNA2
PNMT
POU3F1
POU3F4
PPARG
PPARGC1B
PPP1R16B
PPP1R17
PRDM14
PRLR
PRTG
PTGES
RASGRP2
RASSF9
RMST
RNF43
SCHIP1
SCN4B
SEC14L5
SEMA3G
SEMG1
SEPT3
SEZ6
SHD
SHISA3
SHISAL1
SIT1
SLC16A6
SLC24A2
SLC40A1
SLC6A4
SLCO2A1
SORBS2
SOWAHA
SOX2
SOX8
SPARCL1
SPIB
SPNS2
ST6GAL2
STAMBPL1
TBC1D9
TBX20
TBX3
TCIM
TCTE1
TDGF1
TEX15
TFAP2A
TFAP2B
THBS2
TM4SF18
TMEM132E
TMEM151B
TMEM54
TNFRSF8
TNFSF11
TP63
TRABD2A
TRDN
TRIM54
TRIM55
TRPC4
TTBK1
UCMA
UNC13A
UNC5A
UPK2
USP44
UTF1
UTS2R
VIT
VTCN1
WIF1
WLS
WNT5B
WNT6
WNT9B
WT1
Z99774.1
ZIC2
ZIC5
ZNF703

## Sheet: LineageSpecificHumanEmbryo
lineageSpecific
AARS2
ABHD12B
ACADS
ACE
ACOT11
ACTG2
ADAM15
ADCK1
ADD3
ADK
ADORA2B
AGER
AMBN
AMOTL2
ANKMY2
APELA
APOBEC3C
ARFGEF1
ARRDC2
ATG9B
ATP6V0A4
B3GNT2
BCL3
BCOR
BMP6
C9orf135
CACNB3
CADM1
CALB1
CAPN5
CBFA2T2
CCDC80
CD200
CD70
CDCA7L
CDH11
CERS4
CIDEC
CITED4
CNR2
COCH
CTSF
CXCL12
CXorf65
DEFB124
DEPDC7
DLG5
DND1
DPF1
DPP4
DSTNP2
DUSP4
ESAM
ESRG
FADS3
FAM162B
FGFR2
FLRT3
FRZB
GAL
GATA4
GDPD3
GPCPD1
GUCA1A
H1FX
HAND1
HESX1
HLA-C
HNF1B
HNF4A
HOMER2
HS6ST1
IGF1
IGFBP2
IGSF1
INA
INPP5D
IRX2
KIFAP3
KLF17
KLRG2
L3HYPDH
LAPTM4B
LDLRAP1
LIM2
LINC01108
MAD2L2
MAEL
MAGED2
MAN1C1
MAP4K1
MDP1
MIR663A
MIR6761
MLN
MXRA8
MYCL
NBAS
NEFH
NFKB2
NGEF
NID1
NKD2
NPPB
NRBP2
NUAK2
P4HA1
PAGE2B
PALLD
PARD6B
PBX3
PCED1B
PCP4L1
PDCL2
PDE6G
PDGFA
PHKA2-AS1
PHLDA3
PITX1
PITX2
PKIB
PLK2
POLD4
POU5F1P4
PQLC1
PRDM14
PRPF19
PTGES2
PWWP2B
PYCARD
R3HCC1
REC8
REEP6
RHOU
RNF24
RRAD
SLC12A3
SLC16A9
SLC28A3
SLPI
SNORD116-26
SOAT2
SOCS3
SOX17
SOX2
SPINK1
ST6GALNAC3
STARD10
STAT3
STOM
SUSD2
TACSTD2
TCF7L1
TDGF1P3
TMEM123
TMEM159
TMEM171
TMPRSS2
TNFRSF1A
TNNC1
TRIM2
TRIM8
TSPAN18
UAP1L1
UBTD1
UCP2
UTF1
WFDC2
WNT11
WNT3
ZNF385A
ZNF428
ZSCAN10
ZYG11A
